# Supplementary material for: Acceptorless dehydrogenative condensation: synthesis of indoles and quinolines from diols and anilines
Source: Royal Society of Chemistry journal article supplement (doi:10.1039/d0ob01964j), 2020-12-17

# Acceptorless Dehydrogenative Condensation: Synthesis of Indoles and Quinolines from Diols and Anilines.

## Electronic Supplementary Information

*Delia Bellezza, Ramón J. Zaragoza, M. José Aurell, Rafael Ballesteros  
and Rafael Ballesteros-Garrido\**

|                                                                                                                                                                                                              | Page         |
|--------------------------------------------------------------------------------------------------------------------------------------------------------------------------------------------------------------|--------------|
| <b>Optimized geometries : Figure S1 and Figure S2</b>                                                                                                                                                        | <b>2</b>     |
| <b>Figure S3.</b> Mulliken atomic charges                                                                                                                                                                    | <b>3</b>     |
| <b>IRCs (Figure S4-S14)</b>                                                                                                                                                                                  | <b>3-5</b>   |
| <b>Figure S15.</b> Mechanism for the transformation of the imine <b>Ia</b> into indole <b>II</b> catalysed with H <sub>2</sub> O at B3LYP level                                                              | <b>5</b>     |
| <b>Figure S16.</b> Mechanism for the transformation of the imine <b>Ia</b> into indole <b>II</b> catalysed with H <sub>2</sub> O and p-TSA at B3LYP level                                                    | <b>6</b>     |
| <b>Figure S17.</b> Transformation of imine (from aniline and 1,2-Ethyleneglycol) into indole catalysed with H <sub>2</sub> O. Free energy profile ( $\Delta G$ ) at B3LYP/6-31G* level in 1,2-Ethyleneglycol | <b>6</b>     |
| <b>Figure S18.</b> Comparison of the energy of <b>TS3a1</b> with <b>TS3a1-1H2O</b> (with the additional water molecule) at <b>B3LYP-D3/6-31G*</b> level.                                                     | <b>7</b>     |
| <b>Figure S19.</b> Comparison of the energy of <b>TS3b1</b> with <b>TS3b1-1H2O-1,2,3</b> (with the additional water molecule) at <b>B3LYP-D3/6-31G*</b> level.                                               | <b>7</b>     |
| <b>Table S1-S3.</b> <b>B3LYP/6-31G*</b> total energies                                                                                                                                                       | <b>8-10</b>  |
| <b>Table S4-S5.</b> <b>B3LYP-D3/6-31G*</b> total energies                                                                                                                                                    | <b>11-12</b> |
| <b>Z-matrix</b>                                                                                                                                                                                              | <b>13-29</b> |
| <b>Materials, Measurements, Characterization data and <sup>1</sup>H- <sup>13</sup>C-NMR spectra</b>                                                                                                          | <b>30-69</b> |

## Optimized Geometries

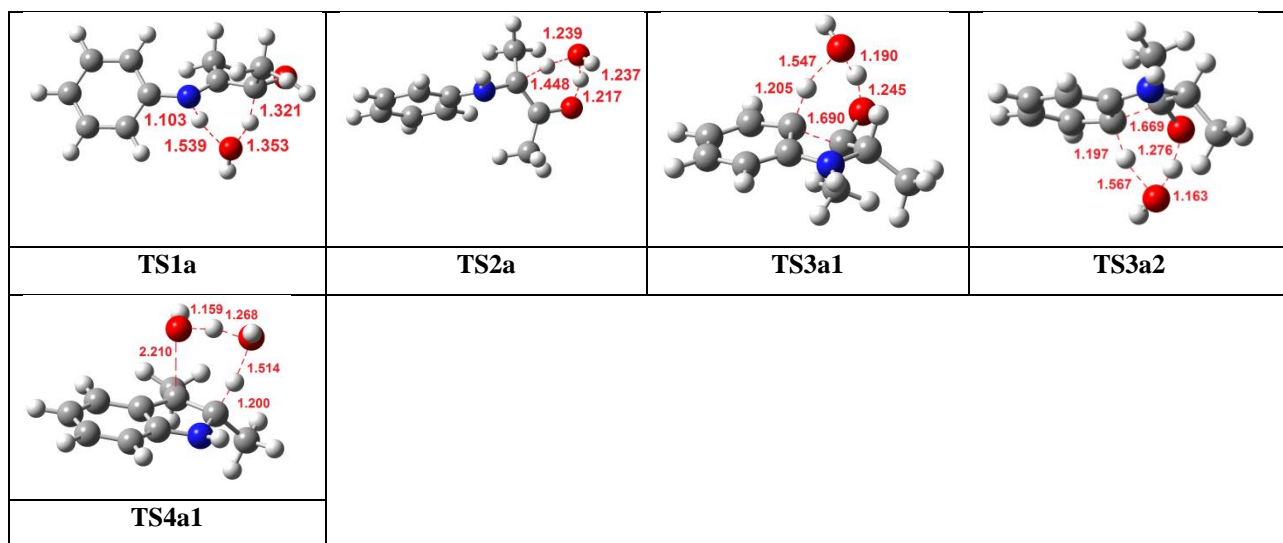

**Figure S1.** Geometries at B3LYP/6-31G\* level of TSs involved in the transformation imine **Ia** into indole **II** catalysed with H<sub>2</sub>O.

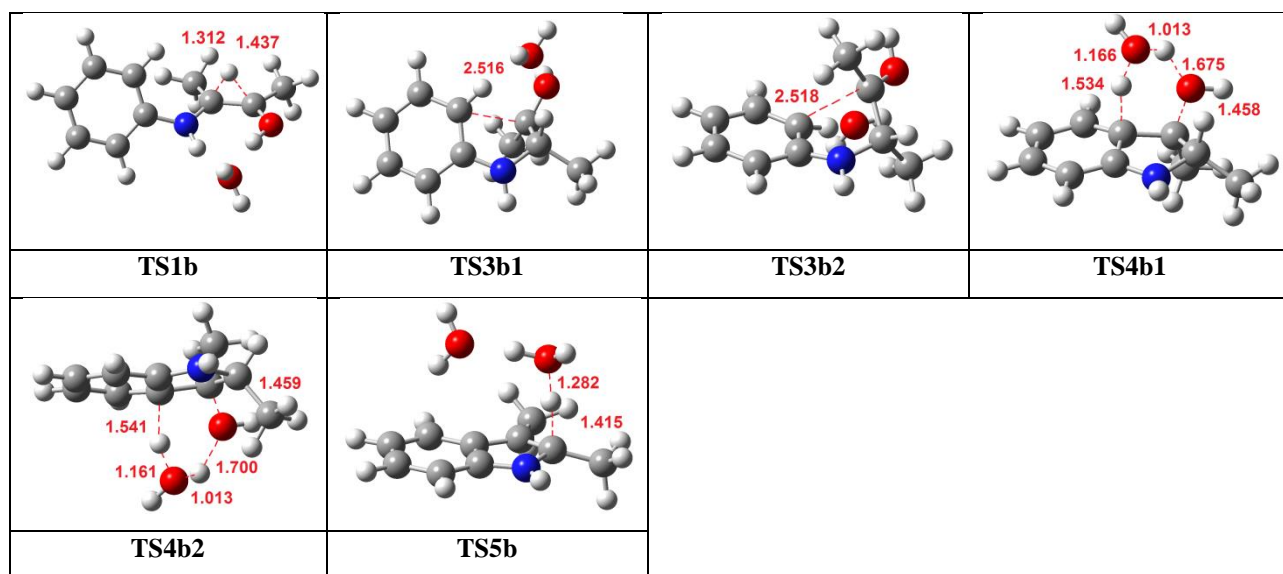

**Figure S2.** Geometries at B3LYP/6-31G\* level of TSs involved in the transformation imine **Ia** into indole **II** catalysed with H<sub>2</sub>O and TsOH.

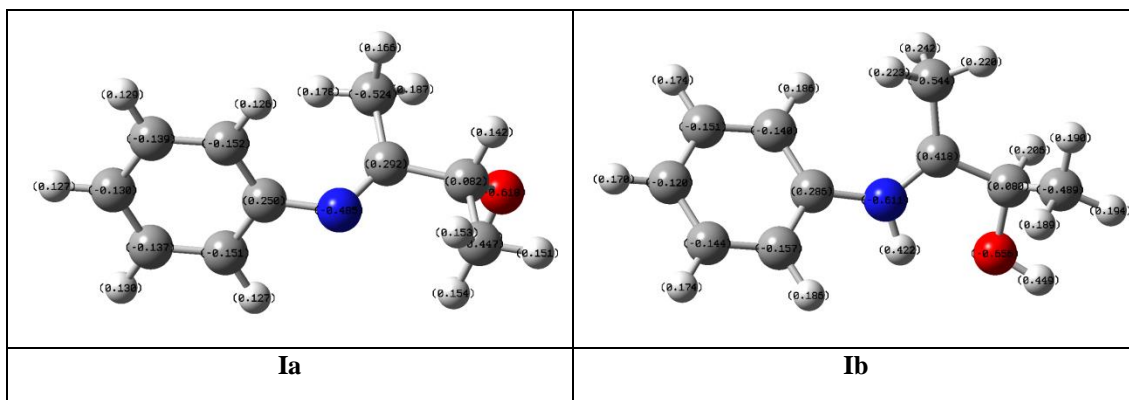

**Figure S3.** Mulliken atomic charges.

### IRCs

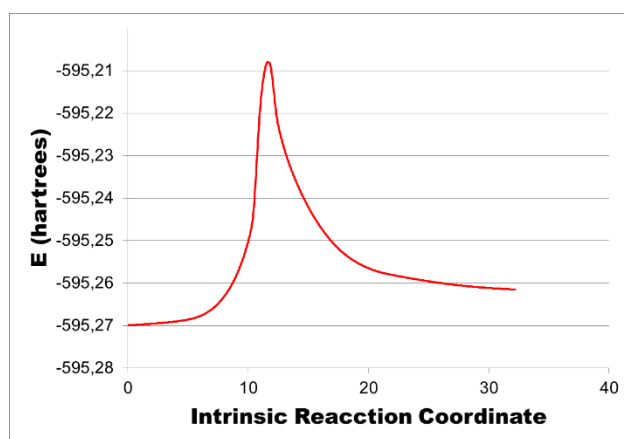

**Figure S4.** Energy profile (IRC,  $E$ ) corresponding to the transition structure TS1a in gas-phase

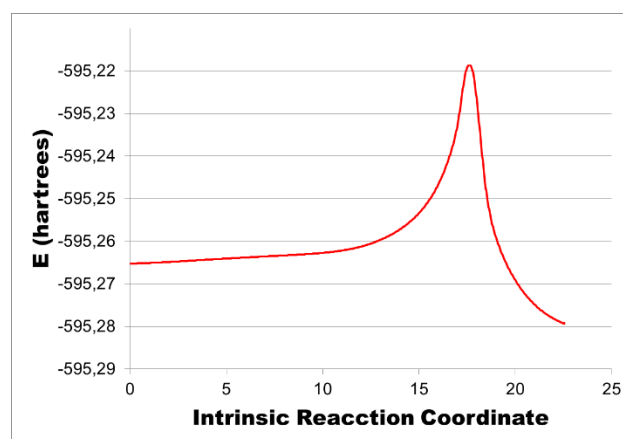

**Figure S5.** Energy profile (IRC,  $E$ ) corresponding to the transition structure TS2a in gas-phase

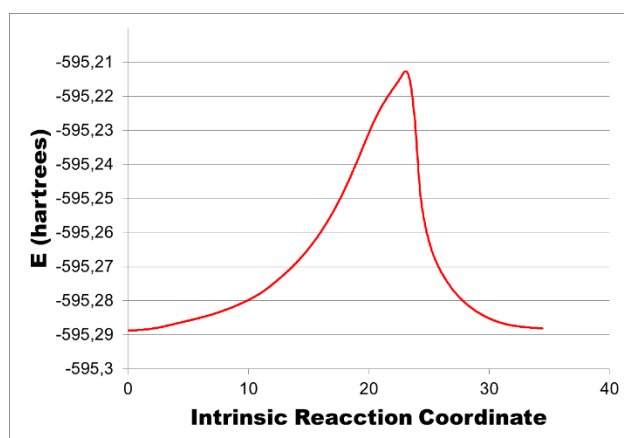

**Figure S6.** Energy profile (IRC,  $E$ ) corresponding to the transition structure TS3a1 in gas-phase

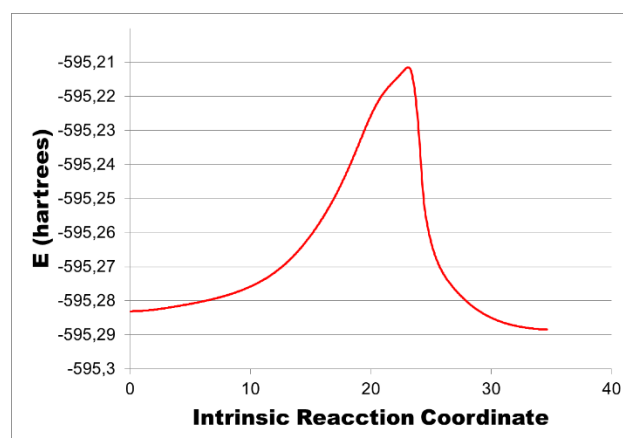

**Figure S7.** Energy profile (IRC,  $E$ ) corresponding to the transition structure TS3a2 in gas-phase

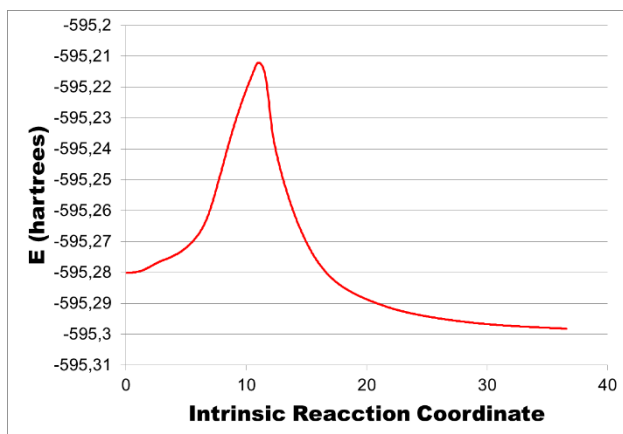

**Figure S8.** Energy profile (IRC,  $E$ ) corresponding to the transition structure **TS4a1** in gas-phase

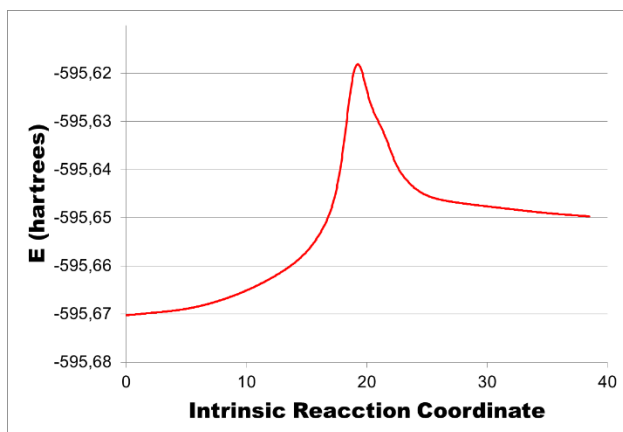

**Figure S9.** Energy profile (IRC,  $E$ ) corresponding to the transition structure **TS1b** in gas-phase

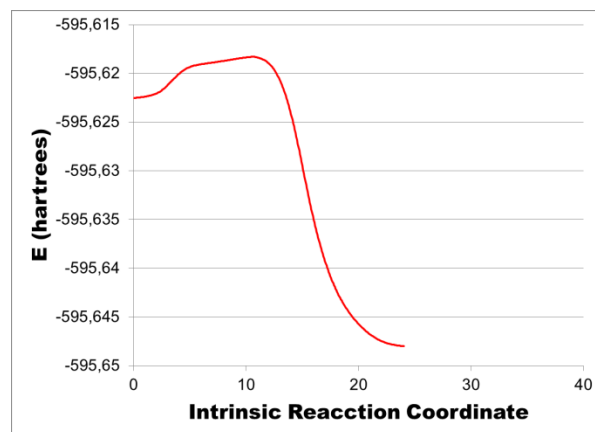

**Figure S10.** Energy profile (IRC,  $E$ ) corresponding to the transition structure **TS3b1** in gas-phase

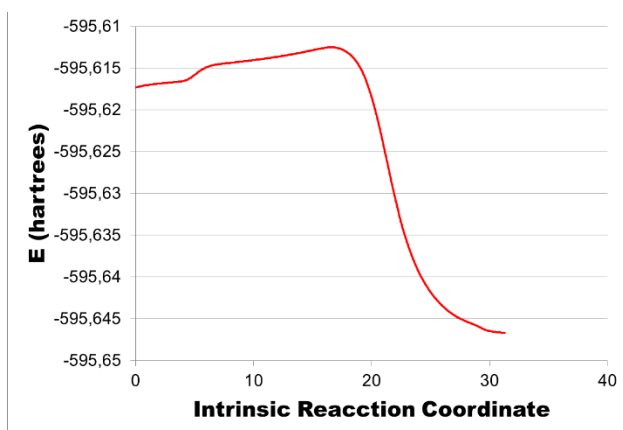

**Figure S11.** Energy profile (IRC,  $E$ ) corresponding to the transition structure **TS3b2** in gas-phase

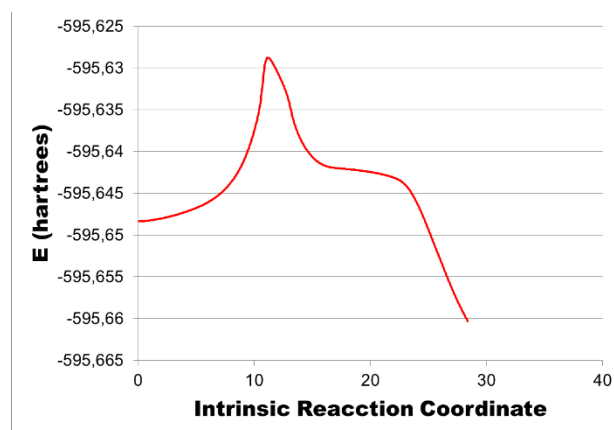

**Figure S12.** Energy profile (IRC,  $E$ ) corresponding to the transition structure **TS4b1** in gas-phase

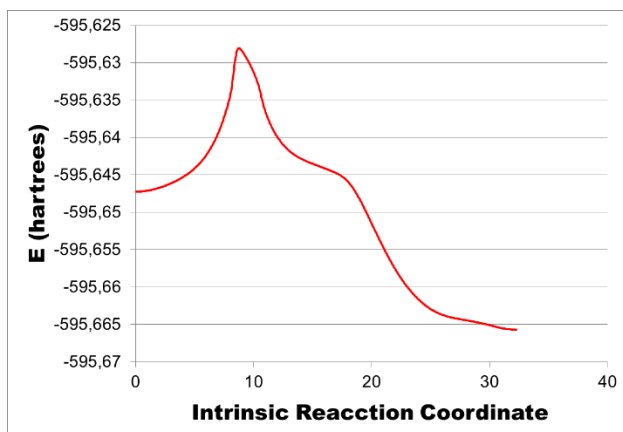

Figure S13. Energy profile (IRC,  $E$ ) corresponding to the transition structure **TS4b2** in gas-phase

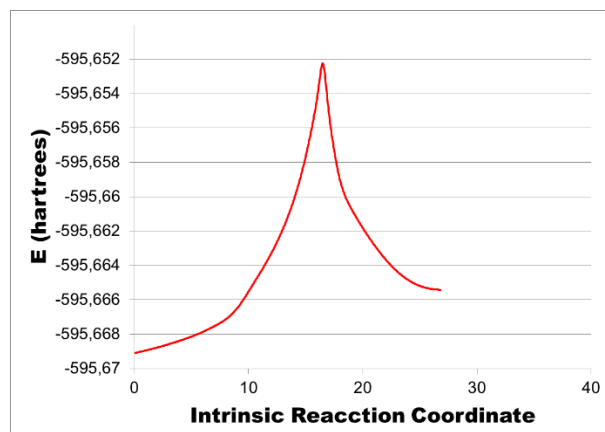

Figure S14. Energy profile (IRC,  $E$ ) corresponding to the transition structure **TS5b** in gas-phase

Figure S15. Mechanism for the transformation of the imine **Ia** into indole **II** catalysed with  $H_2O$  at B3LYP level (See Table S1)

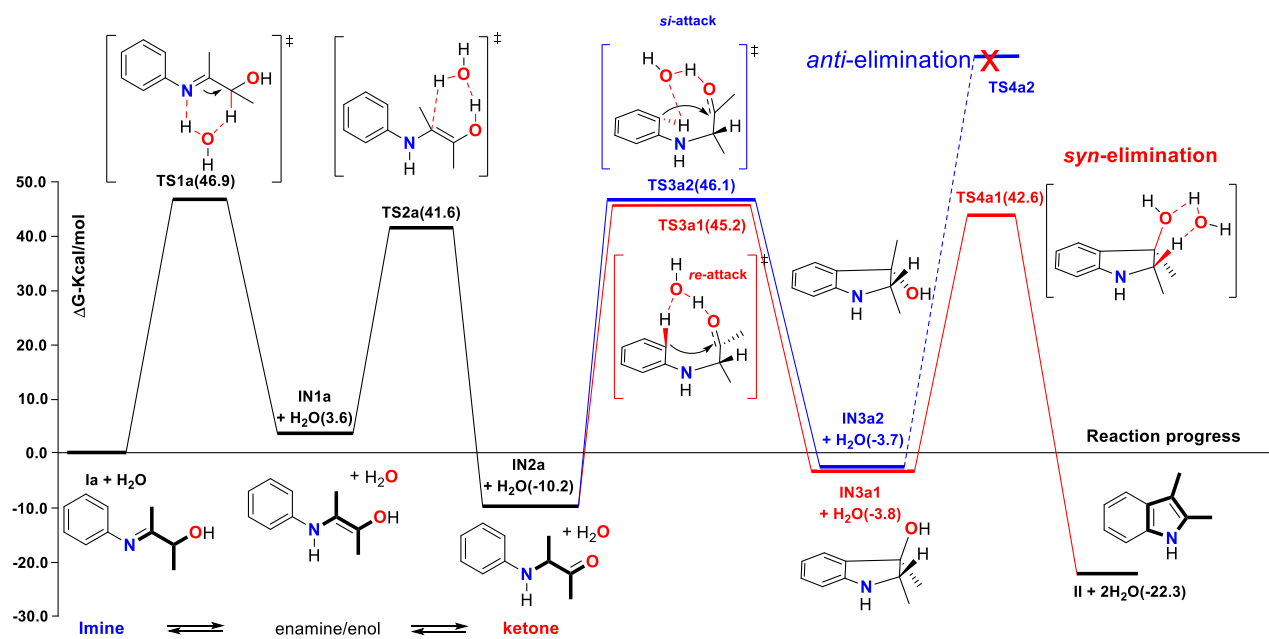

**Figure S16.** Mechanism for the transformation of the imine **Ia** into indole **II** catalysed with H<sub>2</sub>O and p-TSA at **B3LYP** level (See Table S2)

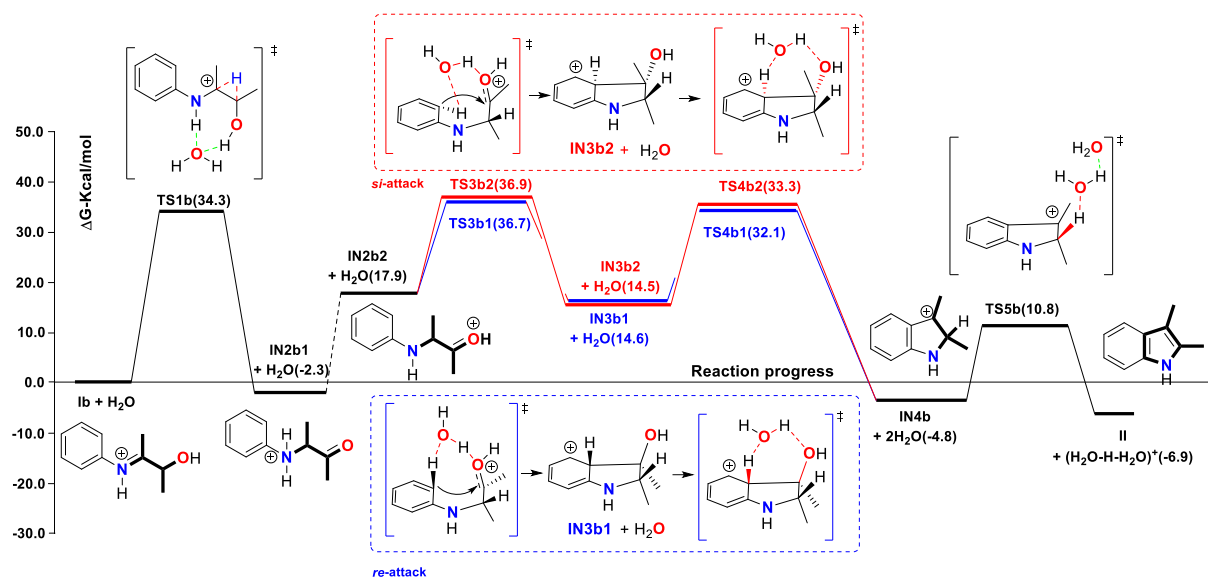

**Figure S17.** Transformation of imine (from aniline and 1,2-Ethyleneglycol) into indole catalysed with H<sub>2</sub>O. Free energy profile ( $\Delta G$ ) at **B3LYP/6-31G\*** level in 1,2-Ethyleneglycol as solvent.(See Table S3)

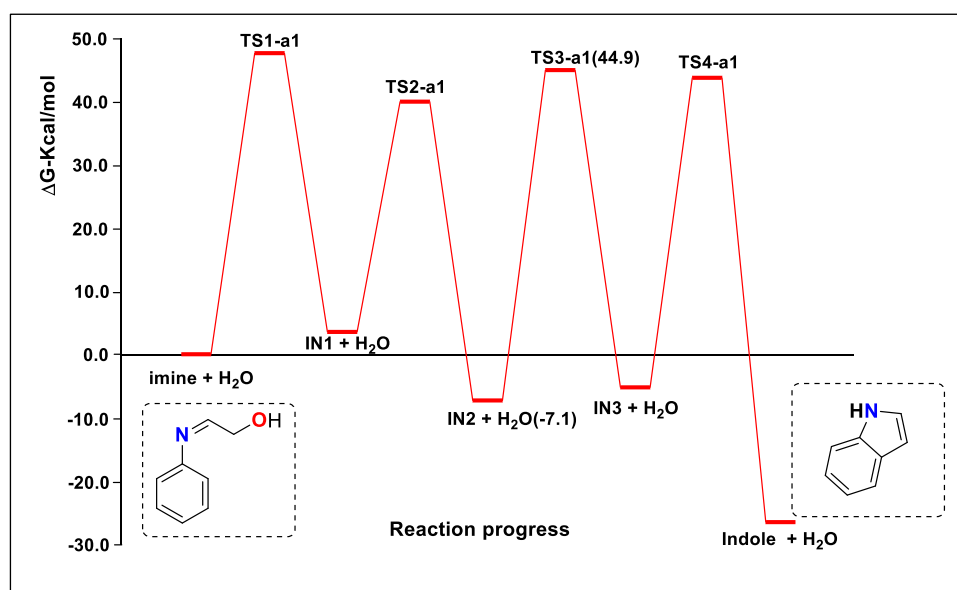

|                                                                                       |                                                                                                              |
|---------------------------------------------------------------------------------------|--------------------------------------------------------------------------------------------------------------|
|                                                                                       |                                                                                                              |
| <b>TS3a1</b>                                                                          | <b>TS3a1-1H2O</b>                                                                                            |
| $\Delta G=36.9$ kcal/mol relative to <b>la</b> + <b>H<sub>2</sub>O</b> (see Table S4) | $G=-671,505922$ au<br>$\Delta G=22.4$ kcal/mol relative to <b>la</b> + <b>2H<sub>2</sub>O</b> (see Table S4) |

**Figure S18.** Comparison of the energy of **TS3a1** with **TS3a1-1H2O** (with the additional water molecule) at **B3LYP-D3/6-31G\*** level. **TS3a1-1H2O** has been calculated keeping the core of the transition state frozen.

|                                                                                                              |                                                                                                              |
|--------------------------------------------------------------------------------------------------------------|--------------------------------------------------------------------------------------------------------------|
|                                                                                                              |                                                                                                              |
| <b>TS3b1</b>                                                                                                 | <b>TS3b1-1H2O-1</b>                                                                                          |
| $\Delta G=24.8$ kcal/mol relative to <b>lb</b> + <b>H<sub>2</sub>O</b> (see Table S5)                        | $G=-671,946571$ au<br>$\Delta G=20.7$ kcal/mol relative to <b>lb</b> + <b>2H<sub>2</sub>O</b> (see Table S5) |
|                                                                                                              |                                                                                                              |
| <b>TS3b1-1H2O-2</b>                                                                                          | <b>TS3b1-1H2O-3</b>                                                                                          |
| $G=-671,950031$ au<br>$\Delta G=18.5$ kcal/mol relative to <b>lb</b> + <b>2H<sub>2</sub>O</b> (see Table S5) | $G=-671,947817$ au<br>$\Delta G=19.9$ kcal/mol relative to <b>lb</b> + <b>2H<sub>2</sub>O</b> (see Table S5) |

**Figure S19.** Comparison of the energy of **TS3b1** with **TS3b1-1H2O-1,2,3** (with the additional water molecule) at **B3LYP-D3/6-31G\*** level. **TS3b1-1H2O** has been calculated keeping the core of the transition state frozen. Note: Observe the calculated energy difference depending on the location and orientation of the additional water molecule.

**Table S1.** Transformation of imine **Ia** into indole **II** catalysed with H<sub>2</sub>O. B3LYP/6-31G\* total energies (*E*, au) in gas phase. B3LYP/6-31G\* total energies (*E*, *H* and *G* in au), *S* (Cal/Mol-Kelvin) and  $\Delta G$  (kcal/mol) in N,N-dimethylacetamide (423.15 K). (see Figure S15)

|                               | B3LYP/6-31G* | B3LYP/6-31G*. solvent = N,N-dimethylacetamide |             |          |             |            |
|-------------------------------|--------------|-----------------------------------------------|-------------|----------|-------------|------------|
|                               | <i>E</i>     | <i>E</i>                                      | <i>H</i>    | <i>S</i> | <i>G</i>    | $\Delta G$ |
| <b>Ia</b>                     | -518.848375  | -518.855583                                   | -518.620440 | 131.006  | -518.708782 |            |
| <b>H<sub>2</sub>O</b>         | -76.408954   | -76.416124                                    | -76.389571  | 47.956   | -76.421910  |            |
| <b>IN1a</b>                   | -518.843929  | -518.851236                                   | -518.615990 | 129.161  | -518.703087 |            |
| <b>IN2a</b>                   | -518.865575  | -518.873927                                   | -518.638518 | 128.325  | -518.725052 |            |
| <b>IN3a1</b>                  | -518.863570  | -518.871222                                   | -518.635259 | 117.961  | -518.714804 |            |
| <b>IN3a2</b>                  | -518.863550  | -518.870937                                   | -518.634922 | 118.233  | -518.714651 |            |
| <b>II</b>                     | -442.456083  | -442.462727                                   | -442.257025 | 113.309  | -442.333434 |            |
| <b>2H<sub>2</sub>O</b>        | -152.830336  | -152.839557                                   | -152.784484 | 71.647   | -152.832798 |            |
|                               |              |                                               |             |          |             |            |
| <b>Ia + H<sub>2</sub>O</b>    | -595.257329  | -595.271707                                   | -595.010011 | 178.962  | -595.130692 | 0.0        |
| <b>TS1a</b>                   | -595.207924  | -595.219697                                   | -594.962219 | 138.955  | -595.055921 | 46.9       |
| <b>IN1a + H<sub>2</sub>O</b>  | -595.252883  | -595.267360                                   | -595.005561 | 177.117  | -595.124997 | 3.6        |
| <b>TS2a</b>                   | -595.218671  | -595.228612                                   | -594.972407 | 136.518  | -595.064465 | 41.6       |
| <b>IN2a + H<sub>2</sub>O</b>  | -595.274529  | -595.290051                                   | -595.028089 | 176.281  | -595.146962 | -10.2      |
| <b>TS3a1</b>                  | -595.212638  | -595.228712                                   | -594.971903 | 128.680  | -595.058676 | 45.2       |
| <b>IN3a1 + H<sub>2</sub>O</b> | -595.272524  | -595.287346                                   | -595.024830 | 165.917  | -595.136714 | -3.8       |
| <b>TS4a1</b>                  | -595.212157  | -595.228105                                   | -594.971620 | 135.148  | -595.062754 | 42.6       |
| <b>II + 2H<sub>2</sub>O</b>   | -595.286419  | -595.302285                                   | -595.041509 | 184.956  | -595.166232 | -22.3      |
| <b>TS3a2</b>                  | -595.211452  | -595.228037                                   | -594.971062 | 127.737  | -595.057200 | 46.1       |
| <b>IN3a2 + H<sub>2</sub>O</b> | -595.272504  | -595.287061                                   | -595.024493 | 166.189  | -595.136561 | -3.7       |



**Table S2.** Transformation of imine **Ib** into indole **II** catalysed with H<sub>2</sub>O and TsOH. B3LYP/6-31G\* total energies (*E*, au) in gas phase. B3LYP/6-31G\* total energies (*E*, *H* and *G* in au), *S* (Cal/Mol-Kelvin) and Δ*G* (kcal/mol) in N,N-dimethylacetamide (423.15 K). (see Figure S16)

|                                                           | B3LYP/6-31G* | B3LYP/6-31G*. solvent = N,N-dimethylacetamide |             |          |             |            |
|-----------------------------------------------------------|--------------|-----------------------------------------------|-------------|----------|-------------|------------|
|                                                           | <i>E</i>     | <i>E</i>                                      | <i>H</i>    | <i>S</i> | <i>G</i>    | Δ <i>G</i> |
| <b>Ib</b>                                                 | -519.240394  | -519.310435                                   | -519.062613 | 124.831  | -519.146791 |            |
| <b>H<sub>2</sub>O</b>                                     | -76.4089536  | -76.416124                                    | -76.389571  | 47.956   | -76.421910  |            |
| <b>IN2b1</b>                                              | -519.238769  | -519.315732                                   | -519.065048 | 126.719  | -519.150498 |            |
| <b>IN2b2</b>                                              | -519.208780  | -519.283405                                   | -519.034287 | 124.454  | -519.118210 |            |
| <b>IN3b1</b>                                              | -519.219915  | -519.291836                                   | -519.044441 | 117.291  | -519.123534 |            |
| <b>IN3b2</b>                                              | -519.219715  | -519.291677                                   | -519.042864 | 119.843  | -519.123678 |            |
| <b>IN4b</b>                                               | -442.816429  | -442.886055                                   | -442.667451 | 112.759  | -442.743488 |            |
| <b>II</b>                                                 | -442.456083  | -442.462727                                   | -442.257025 | 113.309  | -442.333434 |            |
| <b>2H<sub>2</sub>O</b>                                    | -152.830336  | -152.839557                                   | -152.784484 | 71.647   | -152.832798 |            |
| <b>(H<sub>2</sub>O-H-H<sub>2</sub>O)<sup>+</sup></b>      | -153.163083  | -153.264847                                   | -153.199040 | 70.041   | -153.246271 |            |
|                                                           |              |                                               |             |          |             |            |
| <b>Ib + H<sub>2</sub>O</b>                                | -595.649348  | -595.726559                                   | -595.452184 | 172.787  | -595.568701 | 0.0        |
| <b>TS1b</b>                                               | -595.618084  | -595.690297                                   | -595.416648 | 144.315  | -595.513964 | 34.3       |
| <b>IN2b1 + H<sub>2</sub>O</b>                             | -595.647722  | -595.731856                                   | -595.454619 | 174.675  | -595.572408 | -2.3       |
| <b>IN2b2 + H<sub>2</sub>O</b>                             | -595.617734  | -595.699529                                   | -595.423858 | 172.410  | -595.540120 | 17.9       |
| <b>TS3b1</b>                                              | -595.618277  | -595.691076                                   | -595.417336 | 137.824  | -595.510275 | 36.7       |
| <b>IN3b1 + H<sub>2</sub>O</b>                             | -595.628868  | -595.707960                                   | -595.434012 | 165.247  | -595.545444 | 14.6       |
| <b>TS4b1</b>                                              | -595.628773  | -595.701134                                   | -595.428722 | 131.649  | -595.517497 | 32.1       |
| <b>TS3b2</b>                                              | -595.612475  | -595.685669                                   | -595.411275 | 146.349  | -595.509963 | 36.9       |
| <b>IN3b2 + H<sub>2</sub>O</b>                             | -595.628669  | -595.707801                                   | -595.432435 | 167.799  | -595.545588 | 14.5       |
| <b>TS4b2</b>                                              | -595.628033  | -595.700619                                   | -595.427712 | 130.478  | -595.515697 | 33.3       |
| <b>IN4b + 2H<sub>2</sub>O</b>                             | -595.646765  | -595.725612                                   | -595.446593 | 184.406  | -595.576286 | -4.8       |
| <b>TS5b</b>                                               | -595.652245  | -595.723360                                   | -595.451968 | 147.619  | -595.551513 | 10.8       |
| <b>II + (H<sub>2</sub>O-H-H<sub>2</sub>O)<sup>+</sup></b> | -595.619166  | -595.727575                                   | -595.456065 | 183.350  | -595.579705 | -6.9       |

**Table S3.** Transformation of imine into indole catalysed with H<sub>2</sub>O. B3LYP/6-31G\* total energies (*E*, au) in gas phase. B3LYP/6-31G\* total energies (*E*, *H* and *G* in au), *S* (Cal/Mol-Kelvin) and  $\Delta G$  (kcal/mol) in 1,2-Ethyleneglycol (423.15 K). (see Figure S17)

|                                 | B3LYP/6-31G* | B3LYP/6-31G*. solvent = 1,2-Ethanediol |             |          |             |            |
|---------------------------------|--------------|----------------------------------------|-------------|----------|-------------|------------|
|                                 | <i>E</i>     | <i>E</i>                               | <i>H</i>    | <i>S</i> | <i>G</i>    | $\Delta G$ |
| <b>imine</b>                    | -440.210750  | -440.218655                            | -440.045121 | 113.810  | -440.121866 |            |
| <b>H<sub>2</sub>O</b>           | -76.408954   | -76.416149                             | -76.389596  | 49.333   | -76.422863  |            |
| <b>IN1</b>                      | -440.204747  | -440.213484                            | -440.039680 | 113.058  | -440.115919 |            |
| <b>IN2</b>                      | -440.222967  | -440.231728                            | -440.058285 | 110.965  | -440.133112 |            |
| <b>IN3</b>                      | -440.228071  | -440.236193                            | -440.061358 | 101.598  | -440.129869 |            |
| <b>indole</b>                   | -363.816693  | -363.823780                            | -363.679597 | 90.996   | -363.740959 |            |
|                                 |              |                                        |             |          |             |            |
| <b>imine + H<sub>2</sub>O</b>   | -516.619704  | -516.634803                            | -516.434717 | 163.143  | -516.544729 | 0.0        |
| <b>TS1-a1</b>                   | -516.571441  | -516.583557                            | -516.389997 | 116.999  | -516.468893 | 47.6       |
| <b>IN1-a + H<sub>2</sub>O</b>   | -516.613701  | -516.629632                            | -516.429276 | 162.391  | -516.538782 | 3.7        |
| <b>TS2-a1</b>                   | -516.584425  | -516.595025                            | -516.400621 | 118.586  | -516.480588 | 40.2       |
| <b>IN2-a + H<sub>2</sub>O</b>   | -516.631921  | -516.647876                            | -516.447881 | 160.298  | -516.555975 | -7.1       |
| <b>TS3-a1</b>                   | -516.576555  | -516.593679                            | -516.398099 | 111.375  | -516.473203 | 44.9       |
| <b>IN3-a + H<sub>2</sub>O</b>   | -516.637025  | -516.652342                            | -516.450954 | 150.931  | -516.552732 | -5.0       |
| <b>TS4-a1</b>                   | -516.576639  | -516.591277                            | -516.396870 | 115.460  | -516.474728 | 43.9       |
| <b>indole + 2H<sub>2</sub>O</b> | -516.634601  | -516.656077                            | -516.458789 | 189.662  | -516.586685 | -26.3      |

**Table S4.** Transformation of imine **Ia** into indole **II** catalysed with H<sub>2</sub>O. **B3LYP-D3/6-31G\*** total energies (*E*, *H* and *G* in au), *S* (Cal/Mol-Kelvin) and  $\Delta G$  (kcal/mol) in N,N-dimethylacetamide (423.15 K). (see Figure 3)

|                               | <b>B3LYP-D3/6-31G*. solvent = N,N-dimethylacetamide</b> |             |            |             |            |
|-------------------------------|---------------------------------------------------------|-------------|------------|-------------|------------|
|                               | <i>E</i>                                                | <i>H</i>    | <i>S</i>   | <i>G</i>    | $\Delta G$ |
| <b>Ia</b>                     | -518.875610                                             | -518.641732 | 122.184    | -518.724125 |            |
| <b>H<sub>2</sub>O</b>         | -76.416132                                              | -76.389581  | 47.956     | -76.421920  |            |
| <b>IN1a</b>                   | -518.871034                                             | -518.635770 | 129.507    | -518.723100 |            |
| <b>IN2a</b>                   | -518.895468                                             | -518.659908 | 128.379    | -518.746478 |            |
| <b>IN3a1</b>                  | -518.894121                                             | -518.657993 | 117.493    | -518.737222 |            |
| <b>IN3a2</b>                  | -518.894233                                             | -518.658064 | 117.668    | -518.737411 |            |
| <b>II</b>                     | -442.477989                                             | -442.272308 | 113.846    | -442.349078 |            |
| <b>2H<sub>2</sub>O</b>        | -152.841023                                             | -152.785963 | 71.638     | -152.834271 |            |
|                               |                                                         |             |            |             |            |
| <b>Ia + H<sub>2</sub>O</b>    | -595.291742                                             | -595.031313 | 170.140    | -595.146045 | 0.0        |
| <b>TS1a</b>                   | -595.244944                                             | -594.987332 | 137.982    | -595.080378 | 41.2       |
| <b>IN1a + H<sub>2</sub>O</b>  | -595.287166                                             | -595.025351 | 177.463000 | -595.145020 | 0.6        |
| <b>TS2a</b>                   | -595.254635                                             | -594.998491 | 136.631    | -595.090625 | 34.8       |
| <b>IN2a + H<sub>2</sub>O</b>  | -595.311600                                             | -595.049489 | 176.335000 | -595.168398 | -14.0      |
| <b>TS3a1</b>                  | -595.257420                                             | -595.000581 | 128.546    | -595.087264 | 36.9       |
| <b>IN3a1 + H<sub>2</sub>O</b> | -595.310253                                             | -595.047574 | 165.449000 | -595.159142 | -8.2       |
| <b>TS4a1</b>                  | -595.255044                                             | -594.998531 | 135.452    | -595.089871 | 35.2       |
| <b>II + 2H<sub>2</sub>O</b>   | -595.319012                                             | -595.058271 | 185.484000 | -595.183349 | -23.4      |
| <b>TS3a2</b>                  | -595.257453                                             | -595.000418 | 127.454    | -595.086364 | 37.5       |
| <b>IN3a2 + H<sub>2</sub>O</b> | -595.310365                                             | -595.047645 | 165.624000 | -595.159331 | -8.3       |

**Table S5.** Transformation of imine **Ib** into indole **II** catalysed with H<sub>2</sub>O and TsOH. B3LYP-D3/6-31G\* total energies (*E*, *H* and *G* in au), *S* (Cal/Mol-Kelvin) and  $\Delta G$  (kcal/mol) in N,N-dimethylacetamide (423.15 K). (see Figure 4)

|                                                           | B3LYP-D3/6-31G*. solvent = N,N-dimethylacetamide |             |          |             |            |
|-----------------------------------------------------------|--------------------------------------------------|-------------|----------|-------------|------------|
|                                                           | <i>E</i>                                         | <i>H</i>    | <i>S</i> | <i>G</i>    | $\Delta G$ |
| <b>Ib</b>                                                 | -519.323855                                      | -519.075701 | 120.330  | -519.156843 |            |
| <b>H<sub>2</sub>O</b>                                     | -76.416132                                       | -76.389581  | 47.956   | -76.421920  |            |
| <b>IN2b1</b>                                              | -519.338080                                      | -519.087497 | 127.258  | -519.173311 |            |
| <b>IN2b2</b>                                              | -519.305482                                      | -519.057868 | 119.620  | -519.138531 |            |
| <b>IN3b1</b>                                              | -519.316937                                      | -519.069388 | 116.822  | -519.148165 |            |
| <b>IN3b2</b>                                              | -519.316965                                      | -519.067938 | 119.127  | -519.148269 |            |
| <b>IN4b</b>                                               | -442.903663                                      | -442.684749 | 111.898  | -442.760206 |            |
| <b>II</b>                                                 | -442.477989                                      | -442.272308 | 113.846  | -442.349078 |            |
| <b>2H<sub>2</sub>O</b>                                    | -152.841023                                      | -152.785963 | 71.638   | -152.834271 |            |
| <b>(H<sub>2</sub>O-H-H<sub>2</sub>O)<sup>+</sup></b>      | -153.266166                                      | -153.200410 | 70.130   | -153.247700 |            |
|                                                           |                                                  |             |          |             |            |
| <b>Ib + H<sub>2</sub>O</b>                                | -595.739987                                      | -595.465282 | 168.286  | -595.578763 | 0.0        |
| <b>TS1b</b>                                               | -595.714745                                      | -595.441070 | 143.954  | -595.538143 | 25.5       |
| <b>IN2b1 + H<sub>2</sub>O</b>                             | -595.754212                                      | -595.477078 | 175.214  | -595.595231 | -10.3      |
| <b>IN2b2 + H<sub>2</sub>O</b>                             | -595.721614                                      | -595.447449 | 167.576  | -595.560451 | 11.5       |
| <b>TS3b1</b>                                              | -595.718688                                      | -595.443416 | 142.172  | -595.539287 | 24.8       |
| <b>IN3b1 + H<sub>2</sub>O</b>                             | -595.733069                                      | -595.458969 | 164.778  | -595.570085 | 5.4        |
| <b>TS4b1</b>                                              | -595.731548                                      | -595.458661 | 130.146  | -595.546422 | 20.3       |
| <b>TS3b2</b>                                              | -595.713637                                      | -595.438810 | 148.795  | -595.539147 | 24.9       |
| <b>IN3b2 + H<sub>2</sub>O</b>                             | -595.733097                                      | -595.457519 | 167.083  | -595.570189 | 5.4        |
| <b>TS4b2</b>                                              | -595.731286                                      | -595.458278 | 130.229  | -595.546096 | 20.5       |
| <b>IN4b + 2H<sub>2</sub>O</b>                             | -595.744685                                      | -595.463911 | 183.536  | -595.594477 | -9.9       |
| <b>TS5b</b>                                               | -595.750459                                      | -595.479076 | 150.281  | -595.580415 | -1.0       |
| <b>II + (H<sub>2</sub>O-H-H<sub>2</sub>O)<sup>+</sup></b> | -595.744155                                      | -595.472718 | 183.976  | -595.596778 | -11.3      |

**Z-matrix** (Transformation of imine **Ia** into indole **II** catalysed with H<sub>2</sub>O.Solvent: N,N-dimethylacetamide)**Ia** 0 imaginary frequencies

| Center Number | Atomic Number | Atomic Type | Coordinates (Angstroms) |           |           |
|---------------|---------------|-------------|-------------------------|-----------|-----------|
|               |               |             | X                       | Y         | Z         |
| 1             | 6             | 0           | 3.044910                | -1.113454 | 0.662842  |
| 2             | 6             | 0           | 1.662173                | -1.218256 | 0.531850  |
| 3             | 6             | 0           | 0.939861                | -0.240483 | -0.171225 |
| 4             | 6             | 0           | 1.637818                | 0.819989  | -0.771943 |
| 5             | 6             | 0           | 3.025232                | 0.906129  | -0.654494 |
| 6             | 6             | 0           | 3.735157                | -0.053154 | 0.069103  |
| 7             | 1             | 0           | 3.588319                | -1.870702 | 1.222322  |
| 8             | 1             | 0           | 1.122865                | -2.051609 | 0.972583  |
| 9             | 1             | 0           | 1.087615                | 1.559400  | -1.347038 |
| 10            | 1             | 0           | 3.551309                | 1.729580  | -1.130599 |
| 11            | 1             | 0           | 4.815172                | 0.017908  | 0.161619  |
| 12            | 7             | 0           | -0.447604               | -0.414817 | -0.345828 |
| 13            | 6             | 0           | -1.314509               | 0.436114  | 0.051906  |
| 14            | 6             | 0           | -2.792370               | 0.129376  | -0.206144 |
| 15            | 1             | 0           | -3.280178               | 1.058042  | -0.528880 |
| 16            | 8             | 0           | -3.421115               | -0.167495 | 1.051635  |
| 17            | 1             | 0           | -3.042721               | -1.008198 | 1.358306  |
| 18            | 6             | 0           | -1.058761               | 1.702083  | 0.839551  |
| 19            | 1             | 0           | -0.058105               | 1.722225  | 1.275708  |
| 20            | 1             | 0           | -1.167503               | 2.582624  | 0.192418  |
| 21            | 1             | 0           | -1.810218               | 1.787900  | 1.631061  |
| 22            | 6             | 0           | -3.043977               | -0.963508 | -1.236862 |
| 23            | 1             | 0           | -2.646336               | -0.680401 | -2.216662 |
| 24            | 1             | 0           | -2.550404               | -1.895390 | -0.944551 |
| 25            | 1             | 0           | -4.120875               | -1.136728 | -1.326072 |

**IN1a** 0 imaginary frequencies

| Center Number | Atomic Number | Atomic Type | Coordinates (Angstroms) |           |           |
|---------------|---------------|-------------|-------------------------|-----------|-----------|
|               |               |             | X                       | Y         | Z         |
| 1             | 6             | 0           | 3.364422                | -0.486933 | 0.563337  |
| 2             | 6             | 0           | 2.077405                | -0.713549 | 1.042814  |
| 3             | 6             | 0           | 0.954959                | -0.259503 | 0.326094  |
| 4             | 6             | 0           | 1.163008                | 0.429958  | -0.881524 |
| 5             | 6             | 0           | 2.457322                | 0.658154  | -1.346546 |
| 6             | 6             | 0           | 3.568429                | 0.204495  | -0.633514 |
| 7             | 1             | 0           | 4.215125                | -0.849758 | 1.135101  |
| 8             | 1             | 0           | 1.931766                | -1.249163 | 1.979452  |
| 9             | 1             | 0           | 0.304856                | 0.769420  | -1.453675 |
| 10            | 1             | 0           | 2.594804                | 1.194546  | -2.282418 |
| 11            | 1             | 0           | 4.573808                | 0.384907  | -1.002523 |
| 12            | 7             | 0           | -0.334291               | -0.538350 | 0.796672  |
| 13            | 6             | 0           | -1.456548               | 0.288919  | 0.465972  |
| 14            | 6             | 0           | -2.498013               | -0.259971 | -0.195138 |
| 15            | 8             | 0           | -3.655806               | 0.416116  | -0.480372 |
| 16            | 1             | 0           | -3.613254               | 1.305232  | -0.095771 |
| 17            | 1             | 0           | -0.340886               | -0.898409 | 1.745500  |
| 18            | 6             | 0           | -1.411239               | 1.722751  | 0.951199  |
| 19            | 1             | 0           | -2.120915               | 2.386061  | 0.439091  |
| 20            | 1             | 0           | -1.608932               | 1.800093  | 2.030320  |
| 21            | 1             | 0           | -0.415643               | 2.144806  | 0.774332  |
| 22            | 6             | 0           | -2.572023               | -1.665922 | -0.706054 |
| 23            | 1             | 0           | -1.622571               | -2.181661 | -0.565128 |
| 24            | 1             | 0           | -3.365303               | -2.218357 | -0.186695 |
| 25            | 1             | 0           | -2.832693               | -1.658586 | -1.771151 |

IN2a 0 imaginary frequencies

| Center Number | Atomic Number | Atomic Type | Coordinates (Angstroms) |           |           |
|---------------|---------------|-------------|-------------------------|-----------|-----------|
|               |               |             | X                       | Y         | Z         |
| 1             | 6             | 0           | -3.276175               | 0.673197  | 0.342999  |
| 2             | 6             | 0           | -2.002620               | 1.225679  | 0.416608  |
| 3             | 6             | 0           | -0.873649               | 0.488570  | 0.008486  |
| 4             | 6             | 0           | -1.064851               | -0.817970 | -0.476456 |
| 5             | 6             | 0           | -2.349832               | -1.360557 | -0.542243 |
| 6             | 6             | 0           | -3.463318               | -0.626839 | -0.136912 |
| 7             | 1             | 0           | -4.130523               | 1.264819  | 0.662328  |
| 8             | 1             | 0           | -1.868643               | 2.237010  | 0.796225  |
| 9             | 1             | 0           | -0.219241               | -1.414326 | -0.803399 |
| 10            | 1             | 0           | -2.473165               | -2.372070 | -0.920913 |
| 11            | 1             | 0           | -4.459038               | -1.056501 | -0.192893 |
| 12            | 7             | 0           | 0.395695                | 1.061150  | 0.130820  |
| 13            | 6             | 0           | 1.555791                | 0.523781  | -0.560322 |
| 14            | 6             | 0           | 2.155707                | -0.716163 | 0.140499  |
| 15            | 8             | 0           | 2.741041                | -1.549079 | -0.525381 |
| 16            | 1             | 0           | 0.381907                | 2.070610  | 0.200501  |
| 17            | 6             | 0           | 2.017853                | -0.824462 | 1.644902  |
| 18            | 1             | 0           | 2.270247                | 0.119979  | 2.139161  |
| 19            | 1             | 0           | 0.974422                | -1.041312 | 1.902233  |
| 20            | 1             | 0           | 2.659169                | -1.629503 | 2.009242  |
| 21            | 6             | 0           | 2.649967                | 1.598847  | -0.651868 |
| 22            | 1             | 0           | 3.531734                | 1.194520  | -1.155539 |
| 23            | 1             | 0           | 2.290417                | 2.460243  | -1.226756 |
| 24            | 1             | 0           | 2.946345                | 1.948094  | 0.344205  |
| 25            | 1             | 0           | 1.304933                | 0.198529  | -1.581242 |

IN3a1 0 imaginary frequencies

| Center Number | Atomic Number | Atomic Type | Coordinates (Angstroms) |           |           |
|---------------|---------------|-------------|-------------------------|-----------|-----------|
|               |               |             | X                       | Y         | Z         |
| 1             | 6             | 0           | -3.069547               | 0.536231  | 0.046693  |
| 2             | 6             | 0           | -2.005013               | 1.444271  | 0.071759  |
| 3             | 6             | 0           | -0.706062               | 0.935484  | 0.029322  |
| 4             | 6             | 0           | -0.478951               | -0.448125 | -0.036573 |
| 5             | 6             | 0           | -1.540695               | -1.341664 | -0.054055 |
| 6             | 6             | 0           | -2.850007               | -0.843168 | -0.018459 |
| 7             | 1             | 0           | -4.087771               | 0.916371  | 0.072185  |
| 8             | 1             | 0           | -2.187956               | 2.514963  | 0.116878  |
| 9             | 1             | 0           | -1.352480               | -2.411266 | -0.111243 |
| 10            | 1             | 0           | -3.694021               | -1.526424 | -0.043930 |
| 11            | 7             | 0           | 0.512413                | 1.627816  | 0.069186  |
| 12            | 6             | 0           | 1.552190                | 0.715706  | -0.449514 |
| 13            | 6             | 0           | 1.020621                | -0.702361 | -0.035163 |
| 14            | 8             | 0           | 1.446619                | -1.709500 | -0.951975 |
| 15            | 1             | 0           | 0.510247                | 2.560234  | -0.331590 |
| 16            | 1             | 0           | 1.004060                | -1.530518 | -1.797933 |
| 17            | 6             | 0           | 1.507555                | -1.167251 | 1.339625  |
| 18            | 1             | 0           | 1.003051                | -2.100036 | 1.608477  |
| 19            | 1             | 0           | 2.586428                | -1.352372 | 1.323295  |
| 20            | 1             | 0           | 1.284900                | -0.416403 | 2.103692  |
| 21            | 6             | 0           | 2.953850                | 1.093237  | 0.006866  |
| 22            | 1             | 0           | 3.676580                | 0.350474  | -0.348344 |
| 23            | 1             | 0           | 3.246478                | 2.067004  | -0.404075 |
| 24            | 1             | 0           | 3.015252                | 1.156492  | 1.097157  |
| 25            | 1             | 0           | 1.531740                | 0.718609  | -1.556081 |

IN3a2 0 imaginary frequencies

| Center Number | Atomic Number | Atomic Type | Coordinates (Angstroms) |           |           |
|---------------|---------------|-------------|-------------------------|-----------|-----------|
|               |               |             | X                       | Y         | Z         |
| 1             | 6             | 0           | -2.998253               | 0.376528  | -0.100384 |
| 2             | 6             | 0           | -2.014275               | 1.294485  | 0.283034  |
| 3             | 6             | 0           | -0.688544               | 0.857816  | 0.328597  |
| 4             | 6             | 0           | -0.359689               | -0.466209 | 0.001782  |
| 5             | 6             | 0           | -1.342741               | -1.370985 | -0.374529 |
| 6             | 6             | 0           | -2.676354               | -0.943701 | -0.429941 |
| 7             | 1             | 0           | -4.034195               | 0.703132  | -0.146823 |
| 8             | 1             | 0           | -2.276437               | 2.319822  | 0.531479  |
| 9             | 1             | 0           | -1.074089               | -2.392696 | -0.632978 |
| 10            | 1             | 0           | -3.458559               | -1.635503 | -0.728675 |
| 11            | 7             | 0           | 0.456191                | 1.570276  | 0.702454  |
| 12            | 6             | 0           | 1.645785                | 0.834798  | 0.216945  |
| 13            | 1             | 0           | 2.452655                | 0.924557  | 0.953432  |
| 14            | 6             | 0           | 1.137632                | -0.660296 | 0.162730  |
| 15            | 8             | 0           | 1.730443                | -1.427501 | -0.884358 |
| 16            | 1             | 0           | 0.448292                | 2.566897  | 0.512874  |
| 17            | 1             | 0           | 1.339873                | -1.126528 | -1.720204 |
| 18            | 6             | 0           | 1.488272                | -1.397767 | 1.458222  |
| 19            | 1             | 0           | 1.028179                | -2.390484 | 1.465159  |
| 20            | 1             | 0           | 2.575043                | -1.516795 | 1.535246  |
| 21            | 1             | 0           | 1.130868                | -0.835917 | 2.326722  |
| 22            | 6             | 0           | 2.144099                | 1.360404  | -1.132855 |
| 23            | 1             | 0           | 2.458374                | 2.407036  | -1.041877 |
| 24            | 1             | 0           | 3.002208                | 0.779386  | -1.483690 |
| 25            | 1             | 0           | 1.355312                | 1.314733  | -1.894595 |

II 0 imaginary frequencies

| Center Number | Atomic Number | Atomic Type | Coordinates (Angstroms) |           |           |
|---------------|---------------|-------------|-------------------------|-----------|-----------|
|               |               |             | X                       | Y         | Z         |
| 1             | 6             | 0           | -2.898352               | -0.541796 | 0.000965  |
| 2             | 6             | 0           | -1.820665               | -1.422375 | -0.000409 |
| 3             | 6             | 0           | -0.536354               | -0.871294 | -0.001071 |
| 4             | 6             | 0           | -0.310898               | 0.531905  | -0.001102 |
| 5             | 6             | 0           | -1.419217               | 1.395015  | -0.000204 |
| 6             | 6             | 0           | -2.699833               | 0.853101  | 0.001151  |
| 7             | 1             | 0           | -3.910235               | -0.938064 | 0.002008  |
| 8             | 1             | 0           | -1.974508               | -2.498717 | -0.000744 |
| 9             | 1             | 0           | -1.278212               | 2.473097  | -0.000023 |
| 10            | 1             | 0           | -3.563349               | 1.512942  | 0.002604  |
| 11            | 7             | 0           | 0.703149                | -1.475593 | -0.001538 |
| 12            | 6             | 0           | 1.701439                | -0.506554 | -0.000356 |
| 13            | 6             | 0           | 1.117051                | 0.740604  | -0.000762 |
| 14            | 1             | 0           | 0.868472                | -2.470110 | 0.001141  |
| 15            | 6             | 0           | 3.138648                | -0.918904 | 0.001767  |
| 16            | 1             | 0           | 3.388519                | -1.518549 | 0.887784  |
| 17            | 1             | 0           | 3.390594                | -1.521192 | -0.881861 |
| 18            | 1             | 0           | 3.793169                | -0.044155 | 0.001229  |
| 19            | 6             | 0           | 1.799036                | 2.076055  | -0.000241 |
| 20            | 1             | 0           | 1.516893                | 2.673429  | 0.877070  |
| 21            | 1             | 0           | 2.888732                | 1.978373  | 0.010835  |
| 22            | 1             | 0           | 1.532752                | 2.667563  | -0.887700 |

TS1a1 imaginary frequencies = -1417.7198

| Center Number | Atomic Number | Atomic Type | Coordinates (Angstroms) |           |           |
|---------------|---------------|-------------|-------------------------|-----------|-----------|
|               |               |             | X                       | Y         | Z         |
| 1             | 6             | 0           | 3.371409                | 1.080553  | -0.332240 |
| 2             | 6             | 0           | 1.984676                | 1.198618  | -0.318862 |
| 3             | 6             | 0           | 1.187718                | 0.114002  | 0.082817  |
| 4             | 6             | 0           | 1.803482                | -1.074482 | 0.503248  |
| 5             | 6             | 0           | 3.193657                | -1.183402 | 0.480690  |
| 6             | 6             | 0           | 3.983829                | -0.112741 | 0.059863  |
| 7             | 1             | 0           | 3.976235                | 1.925774  | -0.649063 |
| 8             | 1             | 0           | 1.503849                | 2.126277  | -0.616621 |
| 9             | 1             | 0           | 1.200199                | -1.896870 | 0.873113  |
| 10            | 1             | 0           | 3.659713                | -2.108449 | 0.809180  |
| 11            | 1             | 0           | 5.066231                | -0.201852 | 0.050243  |
| 12            | 7             | 0           | -0.207412               | 0.304143  | 0.107847  |
| 13            | 6             | 0           | -1.181093               | -0.554921 | -0.194556 |
| 14            | 6             | 0           | -2.520867               | -0.047655 | 0.020308  |
| 15            | 1             | 0           | -2.325640               | 1.199163  | -0.369596 |
| 16            | 8             | 0           | -3.496199               | -0.873699 | -0.613366 |
| 17            | 1             | 0           | -4.243033               | -0.297868 | -0.831998 |
| 18            | 1             | 0           | -0.604933               | 1.332663  | 0.109106  |
| 19            | 8             | 0           | -1.675275               | 2.379528  | -0.245734 |
| 20            | 1             | 0           | -1.483638               | 2.668488  | -1.154379 |
| 21            | 6             | 0           | -0.941573               | -1.869787 | -0.871301 |
| 22            | 1             | 0           | 0.046881                | -1.935281 | -1.330122 |
| 23            | 1             | 0           | -1.054761               | -2.696014 | -0.156744 |
| 24            | 1             | 0           | -1.723999               | -2.007138 | -1.621574 |
| 25            | 6             | 0           | -2.906851               | 0.242385  | 1.482495  |
| 26            | 1             | 0           | -3.809913               | 0.861954  | 1.512904  |
| 27            | 1             | 0           | -3.112332               | -0.693740 | 2.017407  |
| 28            | 1             | 0           | -2.117512               | 0.791835  | 2.001244  |

TS2a1 imaginary frequencies = -1913.1188

| Center Number | Atomic Number | Atomic Type | Coordinates (Angstroms) |           |           |
|---------------|---------------|-------------|-------------------------|-----------|-----------|
|               |               |             | X                       | Y         | Z         |
| 1             | 6             | 0           | -3.629898               | -0.679610 | -0.578579 |
| 2             | 6             | 0           | -2.321183               | -0.998399 | -0.925874 |
| 3             | 6             | 0           | -1.232758               | -0.337805 | -0.323157 |
| 4             | 6             | 0           | -1.505501               | 0.648397  | 0.643252  |
| 5             | 6             | 0           | -2.822406               | 0.955295  | 0.986704  |
| 6             | 6             | 0           | -3.895375               | 0.299475  | 0.382993  |
| 7             | 1             | 0           | -4.449852               | -1.206018 | -1.061066 |
| 8             | 1             | 0           | -2.128781               | -1.764661 | -1.675013 |
| 9             | 1             | 0           | -0.686274               | 1.174762  | 1.122906  |
| 10            | 1             | 0           | -3.005719               | 1.719693  | 1.737938  |
| 11            | 1             | 0           | -4.917750               | 0.543590  | 0.655767  |
| 12            | 7             | 0           | 0.068777                | -0.635043 | -0.738785 |
| 13            | 6             | 0           | 1.251853                | -0.407661 | 0.058431  |
| 14            | 6             | 0           | 1.919323                | 0.838676  | -0.153376 |
| 15            | 1             | 0           | 2.464139                | -1.113479 | -0.302122 |
| 16            | 8             | 0           | 3.115219                | 1.002938  | 0.305611  |
| 17            | 1             | 0           | 0.116384                | -1.455871 | -1.329079 |
| 18            | 1             | 0           | 4.151326                | -1.310357 | -0.894017 |
| 19            | 8             | 0           | 3.663352                | -1.300934 | -0.052917 |
| 20            | 1             | 0           | 3.593748                | -0.115477 | 0.292128  |
| 21            | 6             | 0           | 1.401490                | 1.923927  | -1.059907 |
| 22            | 1             | 0           | 1.752926                | 1.744281  | -2.084462 |
| 23            | 1             | 0           | 0.312236                | 1.969970  | -1.081090 |
| 24            | 1             | 0           | 1.823711                | 2.879445  | -0.735952 |
| 25            | 6             | 0           | 1.253428                | -1.024750 | 1.471711  |
| 26            | 1             | 0           | 0.317419                | -0.788659 | 1.990267  |
| 27            | 1             | 0           | 1.348617                | -2.115128 | 1.432592  |
| 28            | 1             | 0           | 2.084035                | -0.638098 | 2.067962  |



-----  
**TS3a1** 1 imaginary frequencies = -1103.3972  
-----

| Center Number | Atomic Number | Atomic Type | Coordinates (Angstroms) |           |           |
|---------------|---------------|-------------|-------------------------|-----------|-----------|
|               |               |             | X                       | Y         | Z         |
| 1             | 6             | 0           | 3.108180                | -0.630850 | -0.046822 |
| 2             | 6             | 0           | 2.087777                | -1.394673 | -0.577350 |
| 3             | 6             | 0           | 0.775829                | -0.871593 | -0.519840 |
| 4             | 6             | 0           | 0.513922                | 0.483391  | -0.085293 |
| 5             | 6             | 0           | 1.614223                | 1.175735  | 0.540505  |
| 6             | 6             | 0           | 2.879951                | 0.646051  | 0.540637  |
| 7             | 1             | 0           | 4.119656                | -1.030238 | -0.054835 |
| 8             | 1             | 0           | 2.276475                | -2.390685 | -0.969053 |
| 9             | 1             | 0           | 0.112352                | 1.182297  | -0.981174 |
| 10            | 1             | 0           | 1.423532                | 2.166846  | 0.946886  |
| 11            | 1             | 0           | 3.716191                | 1.192704  | 0.965972  |
| 12            | 7             | 0           | -0.369519               | -1.533659 | -0.736918 |
| 13            | 6             | 0           | -1.563415               | -0.726645 | -0.449309 |
| 14            | 6             | 0           | -1.041534               | 0.386009  | 0.567512  |
| 15            | 8             | 0           | -1.722503               | 1.530728  | 0.493941  |
| 16            | 1             | 0           | -0.406474               | -2.485832 | -1.075258 |
| 17            | 8             | 0           | -0.915856               | 2.089691  | -1.696392 |
| 18            | 1             | 0           | -1.466061               | 1.946756  | -0.650896 |
| 19            | 1             | 0           | -0.552793               | 2.990759  | -1.689586 |
| 20            | 6             | 0           | -0.931133               | -0.114074 | 2.014945  |
| 21            | 1             | 0           | -0.439232               | 0.653003  | 2.619367  |
| 22            | 1             | 0           | -1.936298               | -0.262966 | 2.423115  |
| 23            | 1             | 0           | -0.368227               | -1.050479 | 2.104670  |
| 24            | 1             | 0           | -1.847764               | -0.171520 | -1.352424 |
| 25            | 6             | 0           | -2.741240               | -1.564640 | 0.025382  |
| 26            | 1             | 0           | -3.560536               | -0.894749 | 0.304719  |
| 27            | 1             | 0           | -3.108272               | -2.225705 | -0.769815 |
| 28            | 1             | 0           | -2.484411               | -2.180191 | 0.894149  |

-----  
**TS3a2** 1 imaginary frequencies = -956.4678  
-----

| Center Number | Atomic Number | Atomic Type | Coordinates (Angstroms) |           |           |
|---------------|---------------|-------------|-------------------------|-----------|-----------|
|               |               |             | X                       | Y         | Z         |
| 1             | 6             | 0           | -3.121730               | 0.343597  | -0.284019 |
| 2             | 6             | 0           | -2.170534               | 1.328516  | -0.451081 |
| 3             | 6             | 0           | -0.814296               | 0.972234  | -0.257387 |
| 4             | 6             | 0           | -0.404820               | -0.406838 | -0.099727 |
| 5             | 6             | 0           | -1.464406               | -1.354743 | 0.170495  |
| 6             | 6             | 0           | -2.782819               | -0.998175 | 0.058304  |
| 7             | 1             | 0           | -4.171611               | 0.606734  | -0.389869 |
| 8             | 1             | 0           | -2.455487               | 2.357908  | -0.651037 |
| 9             | 1             | 0           | 0.143078                | -0.830926 | -1.076162 |
| 10            | 1             | 0           | -1.179446               | -2.383583 | 0.380079  |
| 11            | 1             | 0           | -3.575243               | -1.725288 | 0.207133  |
| 12            | 7             | 0           | 0.218343                | 1.805734  | -0.096449 |
| 13            | 6             | 0           | 1.477449                | 1.147424  | 0.298929  |
| 14            | 1             | 0           | 1.887137                | 1.695520  | 1.157910  |
| 15            | 6             | 0           | 1.013914                | -0.316091 | 0.774652  |
| 16            | 8             | 0           | 1.872599                | -1.298376 | 0.491667  |
| 17            | 1             | 0           | 0.129146                | 2.808809  | -0.193029 |
| 18            | 8             | 0           | 1.297546                | -1.573280 | -1.831168 |
| 19            | 1             | 0           | 1.735569                | -1.532016 | -0.754914 |
| 20            | 1             | 0           | 0.982333                | -2.484109 | -1.951035 |
| 21            | 6             | 0           | 0.664205                | -0.286380 | 2.272956  |
| 22            | 1             | 0           | 0.242247                | -1.250141 | 2.572786  |
| 23            | 1             | 0           | 1.587670                | -0.131841 | 2.842818  |
| 24            | 1             | 0           | -0.047079               | 0.508747  | 2.529948  |
| 25            | 6             | 0           | 2.515758                | 1.127978  | -0.819378 |
| 26            | 1             | 0           | 3.390638                | 0.571419  | -0.471708 |
| 27            | 1             | 0           | 2.140642                | 0.628440  | -1.715909 |

28            1            0            2.824520    2.148315    -1.078334

---

TS4a1 1 imaginary frequencies = -930.2046

---

| Center<br>Number | Atomic<br>Number | Atomic<br>Type | Coordinates (Angstroms) |           |           |
|------------------|------------------|----------------|-------------------------|-----------|-----------|
|                  |                  |                | X                       | Y         | Z         |
| 1                | 6                | 0              | -3.291804               | -0.473701 | 0.368687  |
| 2                | 6                | 0              | -2.261988               | -1.401337 | 0.395434  |
| 3                | 6                | 0              | -0.978175               | -0.962023 | 0.023989  |
| 4                | 6                | 0              | -0.742184               | 0.397364  | -0.315701 |
| 5                | 6                | 0              | -1.809015               | 1.314306  | -0.336436 |
| 6                | 6                | 0              | -3.078104               | 0.874595  | -0.002525 |
| 7                | 1                | 0              | -4.295241               | -0.792298 | 0.639415  |
| 8                | 1                | 0              | -2.442798               | -2.434833 | 0.676770  |
| 9                | 1                | 0              | 1.703153                | 2.342077  | 1.135162  |
| 10               | 1                | 0              | -1.631370               | 2.355592  | -0.589115 |
| 11               | 1                | 0              | -3.915122               | 1.566041  | -0.005804 |
| 12               | 7                | 0              | 0.177356                | -1.675489 | -0.112281 |
| 13               | 6                | 0              | 1.294020                | -0.766323 | -0.379124 |
| 14               | 6                | 0              | 0.660140                | 0.552109  | -0.553640 |
| 15               | 8                | 0              | 1.168036                | 1.559534  | 1.347047  |
| 16               | 1                | 0              | 0.331863                | -2.524552 | 0.415738  |
| 17               | 1                | 0              | 1.955721                | -0.670797 | 0.617558  |
| 18               | 8                | 0              | 2.726439                | -0.212465 | 1.837663  |
| 19               | 1                | 0              | 1.941392                | 0.775311  | 1.708119  |
| 20               | 1                | 0              | 2.373021                | -0.729134 | 2.580785  |
| 21               | 6                | 0              | 2.244192                | -1.266535 | -1.470339 |
| 22               | 1                | 0              | 3.085135                | -0.576274 | -1.584845 |
| 23               | 1                | 0              | 2.661154                | -2.237733 | -1.184224 |
| 24               | 1                | 0              | 1.741188                | -1.380526 | -2.437862 |
| 25               | 6                | 0              | 1.267928                | 1.646493  | -1.373876 |
| 26               | 1                | 0              | 2.336847                | 1.754053  | -1.173943 |
| 27               | 1                | 0              | 1.151549                | 1.411065  | -2.441881 |
| 28               | 1                | 0              | 0.776149                | 2.604192  | -1.186392 |

---

**Z-matrix** (Transformation of imine **Ib** into indole **II** catalysed with H<sub>2</sub>O and TsOH. Solvent: N,N-dimethylacetamide)

**Ib** 0 imaginary frequencies

| Center Number | Atomic Number | Atomic Type | Coordinates (Angstroms) |           |           |
|---------------|---------------|-------------|-------------------------|-----------|-----------|
|               |               |             | X                       | Y         | Z         |
| 1             | 6             | 0           | -3.077712               | -1.234806 | 0.513333  |
| 2             | 6             | 0           | -1.694641               | -1.300669 | 0.370915  |
| 3             | 6             | 0           | -1.004474               | -0.184086 | -0.115925 |
| 4             | 6             | 0           | -1.682104               | 0.978439  | -0.498525 |
| 5             | 6             | 0           | -3.068264               | 1.025556  | -0.356899 |
| 6             | 6             | 0           | -3.764565               | -0.071968 | 0.153797  |
| 7             | 1             | 0           | -3.617892               | -2.092699 | 0.900382  |
| 8             | 1             | 0           | -1.154419               | -2.201309 | 0.650280  |
| 9             | 1             | 0           | -1.154385               | 1.815467  | -0.940445 |
| 10            | 1             | 0           | -3.603997               | 1.919219  | -0.660292 |
| 11            | 1             | 0           | -4.843875               | -0.026398 | 0.259315  |
| 12            | 7             | 0           | 0.416011                | -0.320891 | -0.256225 |
| 13            | 6             | 0           | 1.389284                | 0.516250  | -0.057737 |
| 14            | 6             | 0           | 2.785496                | -0.017495 | -0.318533 |
| 15            | 1             | 0           | 3.278567                | 0.707843  | -0.986670 |
| 16            | 8             | 0           | 2.621055                | -1.265852 | -0.967781 |
| 17            | 1             | 0           | 3.456548                | -1.758642 | -0.957296 |
| 18            | 1             | 0           | 0.749540                | -1.244744 | -0.558176 |
| 19            | 6             | 0           | 1.202444                | 1.921099  | 0.397841  |
| 20            | 1             | 0           | 0.307956                | 2.032149  | 1.015913  |
| 21            | 1             | 0           | 2.079422                | 2.262600  | 0.951986  |
| 22            | 1             | 0           | 1.097125                | 2.582855  | -0.472470 |
| 23            | 6             | 0           | 3.596189                | -0.144581 | 0.983780  |
| 24            | 1             | 0           | 3.115464                | -0.850231 | 1.668101  |
| 25            | 1             | 0           | 4.597841                | -0.515498 | 0.742590  |
| 26            | 1             | 0           | 3.721670                | 0.816007  | 1.490324  |

**IN2b1** 0 imaginary frequencies

| Center Number | Atomic Number | Atomic Type | Coordinates (Angstroms) |           |           |
|---------------|---------------|-------------|-------------------------|-----------|-----------|
|               |               |             | X                       | Y         | Z         |
| 1             | 6             | 0           | -1.378245               | 0.690636  | -2.829646 |
| 2             | 6             | 0           | -1.140874               | -0.253773 | -1.829076 |
| 3             | 6             | 0           | -1.307309               | 0.131129  | -0.501991 |
| 4             | 6             | 0           | -1.705131               | 1.416413  | -0.140905 |
| 5             | 6             | 0           | -1.938469               | 2.348297  | -1.152562 |
| 6             | 6             | 0           | -1.773765               | 1.986345  | -2.492227 |
| 7             | 1             | 0           | -1.259171               | 0.407489  | -3.870421 |
| 8             | 1             | 0           | -0.842977               | -1.266881 | -2.086994 |
| 9             | 1             | 0           | -1.840578               | 1.692001  | 0.902192  |
| 10            | 1             | 0           | -2.254610               | 3.353174  | -0.891843 |
| 11            | 1             | 0           | -1.960743               | 2.715001  | -3.274555 |
| 12            | 7             | 0           | -1.068441               | -0.867429 | 0.564172  |
| 13            | 6             | 0           | 0.248958                | -0.827875 | 1.349251  |
| 14            | 1             | 0           | 0.116438                | -0.116365 | 2.169361  |
| 15            | 6             | 0           | 0.422352                | -2.273437 | 1.880040  |
| 16            | 8             | 0           | -0.205729               | -3.157395 | 1.324656  |
| 17            | 1             | 0           | -1.839387               | -0.828028 | 1.240371  |
| 18            | 6             | 0           | 1.347123                | -2.503855 | 3.039584  |
| 19            | 1             | 0           | 1.676668                | -3.545069 | 3.046148  |
| 20            | 1             | 0           | 2.209023                | -1.830233 | 3.030777  |
| 21            | 1             | 0           | 0.793077                | -2.313579 | 3.970215  |
| 22            | 6             | 0           | 1.427743                | -0.419824 | 0.463186  |
| 23            | 1             | 0           | 2.343308                | -0.428461 | 1.060754  |
| 24            | 1             | 0           | 1.560175                | -1.114122 | -0.372519 |
| 25            | 1             | 0           | 1.292306                | 0.590237  | 0.070337  |
| 26            | 1             | 0           | -1.100337               | -1.841092 | 0.200495  |

IN2b2 0 imaginary frequencies

| Center Number | Atomic Number | Atomic Type | Coordinates (Angstroms) |           |           |
|---------------|---------------|-------------|-------------------------|-----------|-----------|
|               |               |             | X                       | Y         | Z         |
| 1             | 6             | 0           | 3.289735                | -0.207052 | -0.537556 |
| 2             | 6             | 0           | 2.043672                | 0.218636  | -0.995016 |
| 3             | 6             | 0           | 0.980863                | 0.295271  | -0.092843 |
| 4             | 6             | 0           | 1.137517                | -0.042637 | 1.249930  |
| 5             | 6             | 0           | 2.388967                | -0.472767 | 1.693902  |
| 6             | 6             | 0           | 3.461322                | -0.556004 | 0.804297  |
| 7             | 1             | 0           | 4.123436                | -0.267444 | -1.229839 |
| 8             | 1             | 0           | 1.904527                | 0.495317  | -2.036952 |
| 9             | 1             | 0           | 0.311491                | 0.039042  | 1.949525  |
| 10            | 1             | 0           | 2.523134                | -0.735590 | 2.738282  |
| 11            | 1             | 0           | 4.432163                | -0.889764 | 1.156775  |
| 12            | 7             | 0           | -0.297687               | 0.772090  | -0.598813 |
| 13            | 6             | 0           | -1.639456               | 0.323897  | -0.076987 |
| 14            | 6             | 0           | -1.331589               | -0.199473 | -1.424289 |
| 15            | 8             | 0           | -0.930717               | -1.485452 | -1.424071 |
| 16            | 1             | 0           | -0.290811               | 1.735200  | -0.934855 |
| 17            | 6             | 0           | -1.835609               | 0.386552  | -2.714483 |
| 18            | 1             | 0           | -2.762961               | -0.126683 | -2.991271 |
| 19            | 1             | 0           | -2.049176               | 1.454918  | -2.640160 |
| 20            | 1             | 0           | -1.107183               | 0.235594  | -3.519331 |
| 21            | 1             | 0           | -0.543905               | -1.734698 | -2.282110 |
| 22            | 6             | 0           | -2.669630               | 1.381931  | 0.230778  |
| 23            | 1             | 0           | -3.648362               | 0.905194  | 0.345377  |
| 24            | 1             | 0           | -2.427164               | 1.883799  | 1.172287  |
| 25            | 1             | 0           | -2.752673               | 2.137842  | -0.555546 |
| 26            | 1             | 0           | -1.509150               | -0.429566 | 0.696189  |

IN3b1 0 imaginary frequencies

| Center Number | Atomic Number | Atomic Type | Coordinates (Angstroms) |           |           |
|---------------|---------------|-------------|-------------------------|-----------|-----------|
|               |               |             | X                       | Y         | Z         |
| 1             | 6             | 0           | 3.108231                | 0.437107  | -0.145576 |
| 2             | 6             | 0           | 2.151684                | 1.399465  | 0.064124  |
| 3             | 6             | 0           | 0.806442                | 0.962685  | 0.124223  |
| 4             | 6             | 0           | 0.445545                | -0.483017 | 0.215746  |
| 5             | 6             | 0           | 1.542353                | -1.424254 | -0.131990 |
| 6             | 6             | 0           | 2.809210                | -0.971033 | -0.279618 |
| 7             | 1             | 0           | 4.144647                | 0.748823  | -0.245531 |
| 8             | 1             | 0           | 2.403935                | 2.454466  | 0.100465  |
| 9             | 1             | 0           | 0.199427                | -0.677046 | 1.278628  |
| 10            | 1             | 0           | 1.312117                | -2.485309 | -0.171046 |
| 11            | 1             | 0           | 3.626999                | -1.655414 | -0.479581 |
| 12            | 7             | 0           | -0.296213               | 1.679758  | 0.037110  |
| 13            | 6             | 0           | -1.529392               | 0.862144  | -0.009405 |
| 14            | 6             | 0           | -0.972791               | -0.527133 | -0.493356 |
| 15            | 8             | 0           | -1.789907               | -1.522356 | 0.063363  |
| 16            | 1             | 0           | -0.307632               | 2.694464  | 0.000124  |
| 17            | 6             | 0           | -0.853927               | -0.656543 | -2.011630 |
| 18            | 1             | 0           | -0.383112               | -1.609706 | -2.276907 |
| 19            | 1             | 0           | -1.845242               | -0.623986 | -2.473276 |
| 20            | 1             | 0           | -0.247248               | 0.142263  | -2.449702 |
| 21            | 1             | 0           | -1.904062               | -2.251812 | -0.565151 |
| 22            | 6             | 0           | -2.637089               | 1.510161  | -0.824606 |
| 23            | 1             | 0           | -3.493690               | 0.830964  | -0.866741 |
| 24            | 1             | 0           | -2.979534               | 2.435367  | -0.348978 |
| 25            | 1             | 0           | -2.320267               | 1.739684  | -1.846224 |
| 26            | 1             | 0           | -1.874619               | 0.700545  | 1.021504  |

**IN3b2** 0 imaginary frequencies

| Center Number | Atomic Number | Atomic Type | Coordinates (Angstroms) |           |           |
|---------------|---------------|-------------|-------------------------|-----------|-----------|
|               |               |             | X                       | Y         | Z         |
| 1             | 6             | 0           | -2.959667               | 0.478754  | -0.018792 |
| 2             | 6             | 0           | -1.980362               | 1.422707  | 0.170409  |
| 3             | 6             | 0           | -0.638817               | 0.979639  | 0.071557  |
| 4             | 6             | 0           | -0.296149               | -0.359613 | -0.489217 |
| 5             | 6             | 0           | -1.420559               | -1.335243 | -0.525227 |
| 6             | 6             | 0           | -2.689287               | -0.907742 | -0.330647 |
| 7             | 1             | 0           | -3.997274               | 0.777977  | 0.105017  |
| 8             | 1             | 0           | -2.219018               | 2.437409  | 0.472371  |
| 9             | 1             | 0           | -0.038770               | -0.184003 | -1.553561 |
| 10            | 1             | 0           | -1.194806               | -2.358803 | -0.809405 |
| 11            | 1             | 0           | -3.528120               | -1.590229 | -0.417666 |
| 12            | 7             | 0           | 0.460576                | 1.580007  | 0.477844  |
| 13            | 6             | 0           | 1.690153                | 0.759918  | 0.326844  |
| 14            | 1             | 0           | 2.266816                | 0.854228  | 1.252849  |
| 15            | 6             | 0           | 1.073555                | -0.694274 | 0.185546  |
| 16            | 8             | 0           | 1.778809                | -1.509713 | -0.717244 |
| 17            | 1             | 0           | 0.475529                | 2.525813  | 0.847841  |
| 18            | 6             | 0           | 0.918636                | -1.359116 | 1.555106  |
| 19            | 1             | 0           | 0.420783                | -2.328717 | 1.462170  |
| 20            | 1             | 0           | 1.905970                | -1.521351 | 2.004462  |
| 21            | 1             | 0           | 0.341358                | -0.739856 | 2.249540  |
| 22            | 6             | 0           | 2.534897                | 1.214545  | -0.862882 |
| 23            | 1             | 0           | 3.410011                | 0.567326  | -0.958878 |
| 24            | 1             | 0           | 1.980084                | 1.167218  | -1.804597 |
| 25            | 1             | 0           | 2.882602                | 2.241720  | -0.714166 |
| 26            | 1             | 0           | 2.445923                | -2.028532 | -0.239118 |

**IN4b** 0 imaginary frequencies

| Center Number | Atomic Number | Atomic Type | Coordinates (Angstroms) |           |           |
|---------------|---------------|-------------|-------------------------|-----------|-----------|
|               |               |             | X                       | Y         | Z         |
| 1             | 6             | 0           | 2.934877                | 0.453891  | 0.427675  |
| 2             | 6             | 0           | 1.925850                | 1.370731  | 0.615711  |
| 3             | 6             | 0           | 0.652731                | 1.031834  | 0.105879  |
| 4             | 6             | 0           | 0.430309                | -0.230755 | -0.580505 |
| 5             | 6             | 0           | 1.520381                | -1.148450 | -0.745388 |
| 6             | 6             | 0           | 2.743130                | -0.800204 | -0.247653 |
| 7             | 1             | 0           | 3.926523                | 0.683613  | 0.807266  |
| 8             | 1             | 0           | 2.097801                | 2.309690  | 1.130944  |
| 9             | 1             | 0           | 1.367059                | -2.093836 | -1.255092 |
| 10            | 1             | 0           | 3.590830                | -1.468521 | -0.353431 |
| 11            | 7             | 0           | -0.492274               | 1.718635  | 0.141836  |
| 12            | 6             | 0           | -1.573203               | 0.983721  | -0.511505 |
| 13            | 6             | 0           | -0.892371               | -0.282835 | -0.960675 |
| 14            | 1             | 0           | -0.610571               | 2.631977  | 0.561458  |
| 15            | 6             | 0           | -1.605917               | -1.362869 | -1.689919 |
| 16            | 1             | 0           | -0.969848               | -2.233778 | -1.858977 |
| 17            | 1             | 0           | -2.498275               | -1.684770 | -1.138612 |
| 18            | 1             | 0           | -1.956265               | -0.999543 | -2.665858 |
| 19            | 6             | 0           | -2.249284               | 1.795211  | -1.633939 |
| 20            | 1             | 0           | -3.056427               | 1.209007  | -2.081172 |
| 21            | 1             | 0           | -2.686370               | 2.710641  | -1.225232 |
| 22            | 1             | 0           | -1.526398               | 2.061548  | -2.409686 |
| 23            | 1             | 0           | -2.328652               | 0.722627  | 0.246736  |

TS1b 1 imaginary frequencies = -937.5560

| Center Number | Atomic Number | Atomic Type | Coordinates (Angstroms) |           |           |
|---------------|---------------|-------------|-------------------------|-----------|-----------|
|               |               |             | X                       | Y         | Z         |
| 1             | 6             | 0           | 3.441039                | 0.629063  | 0.731646  |
| 2             | 6             | 0           | 2.067578                | 0.776976  | 0.919429  |
| 3             | 6             | 0           | 1.178360                | 0.071108  | 0.102800  |
| 4             | 6             | 0           | 1.661233                | -0.777305 | -0.898866 |
| 5             | 6             | 0           | 3.038081                | -0.936365 | -1.063732 |
| 6             | 6             | 0           | 3.929749                | -0.232490 | -0.253320 |
| 7             | 1             | 0           | 4.129603                | 1.178822  | 1.366104  |
| 8             | 1             | 0           | 1.684413                | 1.426511  | 1.701838  |
| 9             | 1             | 0           | 0.971753                | -1.299044 | -1.558030 |
| 10            | 1             | 0           | 3.410392                | -1.599770 | -1.838442 |
| 11            | 1             | 0           | 4.999923                | -0.352078 | -0.389897 |
| 12            | 7             | 0           | -0.228104               | 0.276681  | 0.288455  |
| 13            | 6             | 0           | -1.182098               | -0.699580 | 0.199050  |
| 14            | 6             | 0           | -2.547234               | -0.352791 | -0.122252 |
| 15            | 1             | 0           | -1.602728               | -0.965124 | -1.015032 |
| 16            | 8             | 0           | -2.934796               | 0.848128  | -0.500078 |
| 17            | 1             | 0           | -2.272732               | 1.591597  | -0.453489 |
| 18            | 1             | 0           | -0.512938               | 1.249635  | 0.354482  |
| 19            | 6             | 0           | -0.867369               | -2.055010 | 0.820072  |
| 20            | 1             | 0           | 0.201913                | -2.251347 | 0.749901  |
| 21            | 1             | 0           | -1.141664               | -2.020327 | 1.879812  |
| 22            | 1             | 0           | -1.398028               | -2.879778 | 0.344056  |
| 23            | 6             | 0           | -3.703492               | -1.299498 | 0.034139  |
| 24            | 1             | 0           | -4.172235               | -1.098247 | 1.005671  |
| 25            | 1             | 0           | -4.442411               | -1.092137 | -0.743072 |
| 26            | 1             | 0           | -3.418173               | -2.349482 | 0.001439  |
| 27            | 8             | 0           | -1.339863               | 2.984786  | -0.200617 |
| 28            | 1             | 0           | -0.975969               | 3.444845  | -0.975635 |
| 29            | 1             | 0           | -1.762186               | 3.671192  | 0.342878  |

TS3b1 1 imaginary frequencies = -173.1725

| Center Number | Atomic Number | Atomic Type | Coordinates (Angstroms) |           |           |
|---------------|---------------|-------------|-------------------------|-----------|-----------|
|               |               |             | X                       | Y         | Z         |
| 1             | 6             | 0           | 3.151411                | 0.456744  | -0.535768 |
| 2             | 6             | 0           | 2.048754                | 1.291874  | -0.435505 |
| 3             | 6             | 0           | 0.838996                | 0.786663  | 0.077242  |
| 4             | 6             | 0           | 0.776703                | -0.554577 | 0.543106  |
| 5             | 6             | 0           | 1.915208                | -1.381162 | 0.415187  |
| 6             | 6             | 0           | 3.088252                | -0.893229 | -0.132930 |
| 7             | 1             | 0           | 4.076396                | 0.850836  | -0.946965 |
| 8             | 1             | 0           | 2.104967                | 2.322540  | -0.776405 |
| 9             | 1             | 0           | -0.018964               | -0.871124 | 1.212873  |
| 10            | 1             | 0           | 1.870618                | -2.397593 | 0.796091  |
| 11            | 1             | 0           | 3.964467                | -1.526895 | -0.221640 |
| 12            | 7             | 0           | -0.332737               | 1.520029  | 0.033510  |
| 13            | 6             | 0           | -1.558404               | 0.754393  | 0.051493  |
| 14            | 6             | 0           | -1.360817               | -0.520161 | -0.783339 |
| 15            | 8             | 0           | -2.106843               | -1.510282 | -0.385004 |
| 16            | 1             | 0           | -0.327314               | 2.387190  | -0.487382 |
| 17            | 8             | 0           | -1.587604               | -0.911917 | 2.866576  |
| 18            | 1             | 0           | -2.218315               | -1.572625 | 3.192262  |
| 19            | 1             | 0           | -1.203482               | -0.528213 | 3.670370  |
| 20            | 6             | 0           | -0.832485               | -0.538470 | -2.177312 |
| 21            | 1             | 0           | -0.367090               | -1.501188 | -2.412952 |
| 22            | 1             | 0           | -1.682165               | -0.395213 | -2.864093 |
| 23            | 1             | 0           | -0.108478               | 0.256680  | -2.348103 |
| 24            | 1             | 0           | -2.108429               | -2.261323 | -1.012505 |
| 25            | 6             | 0           | -2.750894               | 1.562478  | -0.496985 |
| 26            | 1             | 0           | -3.667296               | 0.967064  | -0.477151 |

|    |   |   |           |          |           |
|----|---|---|-----------|----------|-----------|
| 27 | 1 | 0 | -2.903667 | 2.433243 | 0.147473  |
| 28 | 1 | 0 | -2.574460 | 1.912310 | -1.520130 |
| 29 | 1 | 0 | -1.800572 | 0.412331 | 1.065276  |

---

TS3b2 1 imaginary frequencies = -134.1513

| Center<br>Number | Atomic<br>Number | Atomic<br>Type | Coordinates (Angstroms) |           |           |
|------------------|------------------|----------------|-------------------------|-----------|-----------|
|                  |                  |                | X                       | Y         | Z         |
| 1                | 6                | 0              | 3.038117                | 0.725769  | -0.673761 |
| 2                | 6                | 0              | 1.909738                | 1.532181  | -0.662196 |
| 3                | 6                | 0              | 0.681722                | 0.998304  | -0.226342 |
| 4                | 6                | 0              | 0.633713                | -0.325209 | 0.276347  |
| 5                | 6                | 0              | 1.789578                | -1.133297 | 0.217618  |
| 6                | 6                | 0              | 2.983121                | -0.621460 | -0.260827 |
| 7                | 1                | 0              | 3.977143                | 1.138748  | -1.031013 |
| 8                | 1                | 0              | 1.957429                | 2.552500  | -1.033165 |
| 9                | 1                | 0              | -0.163477               | -0.657727 | 0.933881  |
| 10               | 1                | 0              | 1.739230                | -2.143073 | 0.614834  |
| 11               | 1                | 0              | 3.879022                | -1.233064 | -0.284673 |
| 12               | 7                | 0              | -0.504349               | 1.677888  | -0.432027 |
| 13               | 6                | 0              | -1.763183               | 0.991101  | -0.230469 |
| 14               | 1                | 0              | -2.512382               | 1.497043  | -0.866626 |
| 15               | 6                | 0              | -1.604626               | -0.385718 | -0.876304 |
| 16               | 8                | 0              | -2.320237               | -1.318590 | -0.322488 |
| 17               | 1                | 0              | -0.505151               | 2.684480  | -0.520634 |
| 18               | 8                | 0              | -0.837829               | -1.931260 | 2.597200  |
| 19               | 1                | 0              | -1.605956               | -2.352997 | 3.012591  |
| 20               | 1                | 0              | -0.191613               | -1.857363 | 3.316679  |
| 21               | 6                | 0              | -1.133086               | -0.567751 | -2.278687 |
| 22               | 1                | 0              | -0.703844               | -1.562667 | -2.433204 |
| 23               | 1                | 0              | -2.012784               | -0.468842 | -2.936090 |
| 24               | 1                | 0              | -0.408392               | 0.194249  | -2.559882 |
| 25               | 6                | 0              | -2.326996               | 0.959673  | 1.200994  |
| 26               | 1                | 0              | -3.347504               | 0.564966  | 1.202253  |
| 27               | 1                | 0              | -1.724956               | 0.355636  | 1.883664  |
| 28               | 1                | 0              | -2.362181               | 1.987083  | 1.574170  |
| 29               | 1                | 0              | -2.309707               | -2.154021 | -0.831946 |

---

TS4b1 1 imaginary frequencies = -904.3146

| Center Number | Atomic Number | Atomic Type | Coordinates (Angstroms) |           |           |
|---------------|---------------|-------------|-------------------------|-----------|-----------|
|               |               |             | X                       | Y         | Z         |
| 1             | 6             | 0           | 3.215333                | 0.486421  | -0.080934 |
| 2             | 6             | 0           | 2.222478                | 1.453824  | -0.092825 |
| 3             | 6             | 0           | 0.889268                | 1.027462  | -0.246684 |
| 4             | 6             | 0           | 0.569693                | -0.364938 | -0.250924 |
| 5             | 6             | 0           | 1.626965                | -1.319444 | -0.350591 |
| 6             | 6             | 0           | 2.934503                | -0.895046 | -0.217600 |
| 7             | 1             | 0           | 4.249849                | 0.802484  | 0.019737  |
| 8             | 1             | 0           | 2.468722                | 2.509517  | -0.037451 |
| 9             | 1             | 0           | 0.358885                | -0.596733 | 1.251014  |
| 10            | 1             | 0           | 1.390520                | -2.374760 | -0.463279 |
| 11            | 1             | 0           | 3.749588                | -1.610603 | -0.230626 |
| 12            | 7             | 0           | -0.224804               | 1.774209  | -0.452475 |
| 13            | 6             | 0           | -1.444594               | 0.950338  | -0.420748 |
| 14            | 6             | 0           | -0.890628               | -0.496764 | -0.712815 |
| 15            | 8             | 0           | -1.557448               | -1.473898 | 0.139095  |
| 16            | 1             | 0           | -0.260649               | 2.760469  | -0.226349 |
| 17            | 8             | 0           | -0.232846               | -0.899776 | 2.209338  |
| 18            | 1             | 0           | -1.019045               | -1.304904 | 1.716410  |
| 19            | 1             | 0           | 0.236666                | -1.599195 | 2.706470  |
| 20            | 6             | 0           | -1.000291               | -0.950452 | -2.166939 |
| 21            | 1             | 0           | -0.541782               | -1.935697 | -2.288461 |
| 22            | 1             | 0           | -2.046382               | -1.013302 | -2.487930 |
| 23            | 1             | 0           | -0.487762               | -0.246982 | -2.829664 |
| 24            | 1             | 0           | -2.449094               | -1.657698 | -0.200465 |
| 25            | 6             | 0           | -2.534063               | 1.488088  | -1.341545 |
| 26            | 1             | 0           | -3.424490               | 0.850625  | -1.304946 |
| 27            | 1             | 0           | -2.843591               | 2.487404  | -1.017452 |
| 28            | 1             | 0           | -2.191862               | 1.557195  | -2.377405 |
| 29            | 1             | 0           | -1.833396               | 0.924471  | 0.610325  |

TS4b2 1 imaginary frequencies = -858.1828

| Center Number | Atomic Number | Atomic Type | Coordinates (Angstroms) |           |           |
|---------------|---------------|-------------|-------------------------|-----------|-----------|
|               |               |             | X                       | Y         | Z         |
| 1             | 6             | 0           | 0.000000                | 0.000000  | 0.000000  |
| 2             | 6             | 0           | 0.000000                | 0.000000  | 1.385708  |
| 3             | 6             | 0           | 1.246122                | 0.000000  | 2.046120  |
| 4             | 6             | 0           | 2.456008                | 0.137105  | 1.300945  |
| 5             | 6             | 0           | 2.416129                | 0.023018  | -0.121414 |
| 6             | 6             | 0           | 1.193200                | 0.001347  | -0.763320 |
| 7             | 1             | 0           | -0.953489               | -0.020961 | -0.520334 |
| 8             | 1             | 0           | -0.928454               | -0.053043 | 1.945397  |
| 9             | 1             | 0           | 2.511231                | 1.676234  | 1.244342  |
| 10            | 1             | 0           | 3.344493                | 0.018837  | -0.687561 |
| 11            | 1             | 0           | 1.140045                | -0.031366 | -1.846106 |
| 12            | 7             | 0           | 1.508619                | -0.141875 | 3.363593  |
| 13            | 6             | 0           | 2.945722                | -0.099648 | 3.683114  |
| 14            | 6             | 0           | 3.630715                | -0.132399 | 2.251107  |
| 15            | 8             | 0           | 4.601963                | 0.940189  | 2.067604  |
| 16            | 1             | 0           | 0.799405                | -0.081123 | 4.081533  |
| 17            | 8             | 0           | 2.958647                | 2.732498  | 1.422502  |
| 18            | 1             | 0           | 3.864774                | 2.399639  | 1.727875  |
| 19            | 1             | 0           | 3.054350                | 3.215403  | 0.577403  |
| 20            | 6             | 0           | 4.325886                | -1.467401 | 1.988365  |
| 21            | 1             | 0           | 4.758982                | -1.491068 | 0.984373  |
| 22            | 1             | 0           | 5.126889                | -1.637304 | 2.719690  |
| 23            | 1             | 0           | 3.613262                | -2.292685 | 2.079674  |
| 24            | 1             | 0           | 5.417940                | 0.742514  | 2.555918  |
| 25            | 6             | 0           | 3.299264                | 1.102032  | 4.563210  |
| 26            | 1             | 0           | 2.759963                | 1.033301  | 5.513768  |



|    |   |   |          |           |          |
|----|---|---|----------|-----------|----------|
| 27 | 1 | 0 | 4.367536 | 1.117689  | 4.802737 |
| 28 | 1 | 0 | 3.030670 | 2.051787  | 4.091413 |
| 29 | 1 | 0 | 3.212866 | -1.016843 | 4.221021 |

TS5b 1 imaginary frequencies = -1182.6449

| Center<br>Number | Atomic<br>Number | Atomic<br>Type | Coordinates (Angstroms) |           |           |
|------------------|------------------|----------------|-------------------------|-----------|-----------|
|                  |                  |                | X                       | Y         | Z         |
| 1                | 6                | 0              | 2.545251                | -0.024787 | 0.900630  |
| 2                | 6                | 0              | 1.710570                | 1.075789  | 0.838795  |
| 3                | 6                | 0              | 0.554044                | 0.961706  | 0.044565  |
| 4                | 6                | 0              | 0.246645                | -0.236567 | -0.667865 |
| 5                | 6                | 0              | 1.120029                | -1.347876 | -0.575004 |
| 6                | 6                | 0              | 2.254119                | -1.231863 | 0.206920  |
| 7                | 1                | 0              | 3.450681                | 0.030705  | 1.497399  |
| 8                | 1                | 0              | 1.939440                | 1.989219  | 1.378713  |
| 9                | 1                | 0              | -2.046475               | -0.574123 | 1.572367  |
| 10               | 1                | 0              | 0.909557                | -2.264395 | -1.118566 |
| 11               | 1                | 0              | 2.947064                | -2.063824 | 0.283869  |
| 12               | 7                | 0              | -0.462734               | 1.843772  | -0.162702 |
| 13               | 6                | 0              | -1.483276               | 1.238234  | -0.935578 |
| 14               | 6                | 0              | -0.991814               | -0.033959 | -1.338984 |
| 15               | 8                | 0              | -0.835524               | -1.296039 | 2.341935  |
| 16               | 1                | 0              | -0.512904               | 2.780120  | 0.214287  |
| 17               | 8                | 0              | -2.752570               | -0.054470 | 1.057113  |
| 18               | 1                | 0              | -1.030807               | -2.105209 | 2.841002  |
| 19               | 1                | 0              | -3.156631               | 0.584479  | 1.670822  |
| 20               | 6                | 0              | -1.695010               | -1.004109 | -2.232653 |
| 21               | 1                | 0              | -1.623040               | -2.029464 | -1.855500 |
| 22               | 1                | 0              | -2.752480               | -0.758318 | -2.357927 |
| 23               | 1                | 0              | -1.234318               | -0.991055 | -3.229107 |
| 24               | 1                | 0              | -0.043494               | -1.490537 | 1.810792  |
| 25               | 6                | 0              | -2.496472               | 2.113095  | -1.636745 |
| 26               | 1                | 0              | -3.317064               | 1.512865  | -2.037165 |
| 27               | 1                | 0              | -2.927342               | 2.850911  | -0.951556 |
| 28               | 1                | 0              | -2.033865               | 2.653531  | -2.470036 |
| 29               | 1                | 0              | -2.179537               | 0.517279  | 0.063247  |

**Z-matrix** (Transformation of **imine** into **indole** catalysed with H<sub>2</sub>O . Solvent: 1,2-Ethyleneglycol)

Imine 0 imaginary frequencies

| Center Number | Atomic Number | Atomic Type | Coordinates (Angstroms) |           |           |
|---------------|---------------|-------------|-------------------------|-----------|-----------|
|               |               |             | X                       | Y         | Z         |
| 1             | 6             | 0           | 0.000000                | 0.000000  | 0.000000  |
| 2             | 6             | 0           | 0.000000                | 0.000000  | 1.392442  |
| 3             | 6             | 0           | 1.211227                | 0.000000  | 2.101517  |
| 4             | 6             | 0           | 2.421024                | 0.050731  | 1.389575  |
| 5             | 6             | 0           | 2.413723                | 0.070774  | -0.004888 |
| 6             | 6             | 0           | 1.206483                | 0.035584  | -0.704985 |
| 7             | 1             | 0           | -0.944323               | -0.015325 | -0.537748 |
| 8             | 1             | 0           | -0.929189               | -0.011167 | 1.954265  |
| 9             | 1             | 0           | 3.360692                | 0.107779  | 1.931917  |
| 10            | 1             | 0           | 3.355476                | 0.120562  | -0.545307 |
| 11            | 1             | 0           | 1.204457                | 0.052306  | -1.791309 |
| 12            | 7             | 0           | 1.143703                | 0.001073  | 3.512250  |
| 13            | 6             | 0           | 1.987311                | -0.672958 | 4.190570  |
| 14            | 1             | 0           | 2.745939                | -1.324364 | 3.729541  |
| 15            | 6             | 0           | 1.978930                | -0.649725 | 5.696176  |
| 16            | 1             | 0           | 2.884605                | -0.150315 | 6.062526  |
| 17            | 1             | 0           | 1.109612                | -0.074994 | 6.043802  |
| 18            | 8             | 0           | 2.028320                | -1.964410 | 6.242669  |
| 19            | 1             | 0           | 1.202154                | -2.409892 | 5.997259  |

IN1 0 imaginary frequencies

| Center Number | Atomic Number | Atomic Type | Coordinates (Angstroms) |           |           |
|---------------|---------------|-------------|-------------------------|-----------|-----------|
|               |               |             | X                       | Y         | Z         |
| 1             | 6             | 0           | 0.000000                | 0.000000  | 0.000000  |
| 2             | 6             | 0           | 0.000000                | 0.000000  | 1.391182  |
| 3             | 6             | 0           | 1.212185                | 0.000000  | 2.106390  |
| 4             | 6             | 0           | 2.420147                | 0.002090  | 1.386924  |
| 5             | 6             | 0           | 2.405225                | -0.006767 | -0.007326 |
| 6             | 6             | 0           | 1.201756                | -0.008443 | -0.713785 |
| 7             | 1             | 0           | -0.949006               | 0.000471  | -0.530477 |
| 8             | 1             | 0           | -0.942119               | -0.001726 | 1.936645  |
| 9             | 1             | 0           | 3.363116                | 0.033649  | 1.923760  |
| 10            | 1             | 0           | 3.350406                | -0.004120 | -0.544814 |
| 11            | 1             | 0           | 1.198313                | -0.012911 | -1.799758 |
| 12            | 7             | 0           | 1.196450                | 0.021313  | 3.500930  |
| 13            | 6             | 0           | 2.285379                | -0.445960 | 4.271464  |
| 14            | 1             | 0           | 2.801806                | -1.342855 | 3.915788  |
| 15            | 6             | 0           | 2.661429                | 0.156322  | 5.407254  |
| 16            | 1             | 0           | 2.193955                | 1.069366  | 5.762076  |
| 17            | 8             | 0           | 3.617764                | -0.282914 | 6.274419  |
| 18            | 1             | 0           | 4.013726                | -1.096740 | 5.921115  |
| 19            | 1             | 0           | 0.279471                | -0.092885 | 3.913101  |

IN2 0 imaginary frequencies

| Center Number | Atomic Number | Atomic Type | Coordinates (Angstroms) |           |           |
|---------------|---------------|-------------|-------------------------|-----------|-----------|
|               |               |             | X                       | Y         | Z         |
| 1             | 6             | 0           | 0.000000                | 0.000000  | 0.000000  |
| 2             | 6             | 0           | 0.000000                | 0.000000  | 1.390417  |
| 3             | 6             | 0           | 1.210858                | 0.000000  | 2.108190  |
| 4             | 6             | 0           | 2.418958                | 0.003018  | 1.389994  |
| 5             | 6             | 0           | 2.404012                | -0.000015 | -0.006169 |
| 6             | 6             | 0           | 1.202699                | -0.000169 | -0.712968 |
| 7             | 1             | 0           | -0.948724               | 0.001998  | -0.530699 |

|    |   |   |           |           |           |
|----|---|---|-----------|-----------|-----------|
| 8  | 1 | 0 | -0.942321 | -0.004002 | 1.935162  |
| 9  | 1 | 0 | 3.371533  | 0.002923  | 1.909928  |
| 10 | 1 | 0 | 3.350237  | 0.001037  | -0.541179 |
| 11 | 1 | 0 | 1.200327  | -0.000531 | -1.798842 |
| 12 | 7 | 0 | 1.175764  | -0.034273 | 3.507320  |
| 13 | 6 | 0 | 2.338311  | 0.311963  | 4.297229  |
| 14 | 1 | 0 | 2.887100  | 1.190845  | 3.926361  |
| 15 | 6 | 0 | 3.318358  | -0.852571 | 4.435117  |
| 16 | 1 | 0 | 2.843495  | -1.856564 | 4.366470  |
| 17 | 1 | 0 | 1.999091  | 0.547854  | 5.314813  |
| 18 | 8 | 0 | 4.503848  | -0.711449 | 4.626911  |
| 19 | 1 | 0 | 0.292645  | 0.262170  | 3.898803  |

-----

**IN3** 0 imaginary frequencies

| Center<br>Number | Atomic<br>Number | Atomic<br>Type | Coordinates (Angstroms) |           |           |
|------------------|------------------|----------------|-------------------------|-----------|-----------|
|                  |                  |                | X                       | Y         | Z         |
| 1                | 6                | 0              | 0.000000                | 0.000000  | 0.000000  |
| 2                | 6                | 0              | 0.000000                | 0.000000  | 1.398913  |
| 3                | 6                | 0              | 1.231818                | 0.000000  | 2.056568  |
| 4                | 6                | 0              | 2.432256                | 0.002814  | 1.328464  |
| 5                | 6                | 0              | 2.422182                | -0.005803 | -0.059669 |
| 6                | 6                | 0              | 1.192492                | -0.001518 | -0.730895 |
| 7                | 1                | 0              | -0.951013               | 0.005261  | -0.526769 |
| 8                | 1                | 0              | -0.933893               | 0.004185  | 1.955254  |
| 9                | 1                | 0              | 3.359343                | 0.000614  | -0.611085 |
| 10               | 1                | 0              | 1.163995                | 0.001558  | -1.816612 |
| 11               | 7                | 0              | 1.487364                | -0.035826 | 3.433310  |
| 12               | 6                | 0              | 2.891289                | 0.357859  | 3.640939  |
| 13               | 1                | 0              | 3.326032                | -0.157237 | 4.502075  |
| 14               | 6                | 0              | 3.594166                | -0.003897 | 2.299429  |
| 15               | 1                | 0              | 4.045867                | -1.001260 | 2.365565  |
| 16               | 8                | 0              | 4.678708                | 0.851723  | 1.970064  |
| 17               | 1                | 0              | 0.803139                | 0.413407  | 4.031261  |
| 18               | 1                | 0              | 2.996460                | 1.444613  | 3.800947  |
| 19               | 1                | 0              | 4.296388                | 1.711815  | 1.729201  |

-----

**Indole** 0 imaginary frequencies

| Center<br>Number | Atomic<br>Number | Atomic<br>Type | Coordinates (Angstroms) |           |           |
|------------------|------------------|----------------|-------------------------|-----------|-----------|
|                  |                  |                | X                       | Y         | Z         |
| 1                | 6                | 0              | 0.000000                | 0.000000  | 0.000000  |
| 2                | 6                | 0              | 0.000000                | 0.000000  | 1.389882  |
| 3                | 6                | 0              | 1.240941                | 0.000000  | 2.035871  |
| 4                | 6                | 0              | 2.472195                | -0.000923 | 1.320837  |
| 5                | 6                | 0              | 2.436347                | -0.000965 | -0.084985 |
| 6                | 6                | 0              | 1.206772                | -0.000372 | -0.730411 |
| 7                | 1                | 0              | -0.946873               | 0.000480  | -0.533097 |
| 8                | 1                | 0              | -0.930518               | 0.000747  | 1.952139  |
| 9                | 1                | 0              | 3.360710                | -0.000671 | -0.657233 |
| 10               | 1                | 0              | 1.169453                | 0.000170  | -1.816450 |
| 11               | 7                | 0              | 1.551543                | 0.001237  | 3.381235  |
| 12               | 6                | 0              | 2.926473                | 0.000828  | 3.533285  |
| 13               | 1                | 0              | 3.366544                | 0.002823  | 4.520961  |
| 14               | 6                | 0              | 3.523613                | -0.001000 | 2.300708  |
| 15               | 1                | 0              | 4.588275                | 0.000444  | 2.111136  |
| 16               | 1                | 0              | 0.882480                | 0.001269  | 4.134861  |

TS1-a1 1 imaginary frequencies = -1564.7877

| Center Number | Atomic Number | Atomic Type | Coordinates (Angstroms) |           |           |
|---------------|---------------|-------------|-------------------------|-----------|-----------|
|               |               |             | X                       | Y         | Z         |
| 1             | 6             | 0           | 0.000000                | 0.000000  | 0.000000  |
| 2             | 6             | 0           | 0.000000                | 0.000000  | 1.392274  |
| 3             | 6             | 0           | 1.214582                | 0.000000  | 2.094615  |
| 4             | 6             | 0           | 2.425456                | 0.033516  | 1.387551  |
| 5             | 6             | 0           | 2.413194                | 0.028719  | -0.006166 |
| 6             | 6             | 0           | 1.205200                | 0.008642  | -0.706421 |
| 7             | 1             | 0           | -0.945922               | -0.004343 | -0.534366 |
| 8             | 1             | 0           | -0.933870               | -0.004453 | 1.947557  |
| 9             | 1             | 0           | 3.369598                | 0.089311  | 1.920895  |
| 10            | 1             | 0           | 3.355367                | 0.056279  | -0.546665 |
| 11            | 1             | 0           | 1.203091                | 0.014172  | -1.792464 |
| 12            | 7             | 0           | 1.156353                | -0.018255 | 3.500653  |
| 13            | 6             | 0           | 2.103297                | -0.424394 | 4.320483  |
| 14            | 1             | 0           | 2.998564                | -0.907046 | 3.923604  |
| 15            | 6             | 0           | 1.864017                | -0.374366 | 5.738258  |
| 16            | 1             | 0           | 1.762648                | 0.655849  | 6.111495  |
| 17            | 1             | 0           | 0.554107                | -0.586962 | 5.735680  |
| 18            | 8             | 0           | 2.820282                | -1.109594 | 6.482004  |
| 19            | 1             | 0           | 2.340429                | -1.794300 | 6.967932  |
| 20            | 1             | 0           | 0.178202                | 0.048424  | 4.069483  |
| 21            | 8             | 0           | -0.656716               | -0.253235 | 5.230855  |
| 22            | 1             | 0           | -1.120824               | -1.083949 | 5.030062  |

TS2-a1 1 imaginary frequencies = -1850.0902

| Center Number | Atomic Number | Atomic Type | Coordinates (Angstroms) |           |           |
|---------------|---------------|-------------|-------------------------|-----------|-----------|
|               |               |             | X                       | Y         | Z         |
| 1             | 6             | 0           | 0.000000                | 0.000000  | 0.000000  |
| 2             | 6             | 0           | 0.000000                | 0.000000  | 1.390773  |
| 3             | 6             | 0           | 1.211103                | 0.000000  | 2.109615  |
| 4             | 6             | 0           | 2.418510                | 0.003833  | 1.389007  |
| 5             | 6             | 0           | 2.404143                | 0.008426  | -0.005969 |
| 6             | 6             | 0           | 1.202122                | 0.006911  | -0.713651 |
| 7             | 1             | 0           | -0.948904               | 0.000124  | -0.530823 |
| 8             | 1             | 0           | -0.942725               | -0.001974 | 1.935442  |
| 9             | 1             | 0           | 3.364208                | -0.010226 | 1.920752  |
| 10            | 1             | 0           | 3.350067                | 0.010707  | -0.542176 |
| 11            | 1             | 0           | 1.199440                | 0.010635  | -1.799639 |
| 12            | 7             | 0           | 1.186580                | -0.036510 | 3.506164  |
| 13            | 6             | 0           | 2.291188                | 0.399003  | 4.306383  |
| 14            | 1             | 0           | 2.865789                | 1.246084  | 3.906217  |
| 15            | 6             | 0           | 3.058365                | -0.611187 | 4.945907  |
| 16            | 1             | 0           | 2.812682                | -1.666087 | 4.759003  |
| 17            | 1             | 0           | 2.196108                | 1.210015  | 5.544128  |
| 18            | 8             | 0           | 3.922325                | -0.364277 | 5.852874  |
| 19            | 1             | 0           | 0.272638                | 0.147314  | 3.898318  |
| 20            | 1             | 0           | 2.368120                | 1.505996  | 7.293655  |
| 21            | 8             | 0           | 2.832312                | 1.683109  | 6.456872  |
| 22            | 1             | 0           | 3.584207                | 0.779201  | 6.283123  |

TS3-a1 1 imaginary frequencies = -1097.7126

| Center Number | Atomic Number | Atomic Type | Coordinates (Angstroms) |           |           |
|---------------|---------------|-------------|-------------------------|-----------|-----------|
|               |               |             | X                       | Y         | Z         |
| 1             | 6             | 0           | 0.000000                | 0.000000  | 0.000000  |
| 2             | 6             | 0           | 0.000000                | 0.000000  | 1.381389  |
| 3             | 6             | 0           | 1.251517                | 0.000000  | 2.036495  |
| 4             | 6             | 0           | 2.489541                | 0.183476  | 1.311142  |
| 5             | 6             | 0           | 2.412729                | 0.069473  | -0.124369 |
| 6             | 6             | 0           | 1.200670                | 0.004161  | -0.765061 |
| 7             | 1             | 0           | -0.953040               | -0.033926 | -0.522687 |
| 8             | 1             | 0           | -0.927670               | -0.065847 | 1.943513  |
| 9             | 1             | 0           | 3.019272                | 1.240991  | 1.561084  |
| 10            | 1             | 0           | 3.343889                | 0.111368  | -0.685106 |
| 11            | 1             | 0           | 1.140677                | -0.029812 | -1.848627 |
| 12            | 7             | 0           | 1.490297                | -0.268112 | 3.329926  |
| 13            | 6             | 0           | 2.920795                | -0.327989 | 3.641682  |
| 14            | 1             | 0           | 3.120859                | -1.101946 | 4.388557  |
| 15            | 6             | 0           | 3.610245                | -0.617941 | 2.253893  |
| 16            | 1             | 0           | 3.492154                | -1.688476 | 2.003847  |
| 17            | 8             | 0           | 4.859800                | -0.185810 | 2.122411  |
| 18            | 1             | 0           | 0.757175                | -0.385233 | 4.015315  |
| 19            | 1             | 0           | 3.289951                | 0.637981  | 4.006457  |
| 20            | 8             | 0           | 4.176884                | 2.117206  | 2.082962  |
| 21            | 1             | 0           | 4.706001                | 1.064189  | 2.153729  |
| 22            | 1             | 0           | 4.564846                | 2.560789  | 1.310755  |

TS4-a1 1 imaginary frequencies = -1155.4253

| Center Number | Atomic Number | Atomic Type | Coordinates (Angstroms) |           |           |
|---------------|---------------|-------------|-------------------------|-----------|-----------|
|               |               |             | X                       | Y         | Z         |
| 1             | 6             | 0           | 0.000000                | 0.000000  | 0.000000  |
| 2             | 6             | 0           | 0.000000                | 0.000000  | 1.386595  |
| 3             | 6             | 0           | 1.246339                | 0.000000  | 2.038997  |
| 4             | 6             | 0           | 2.457445                | 0.047644  | 1.295074  |
| 5             | 6             | 0           | 2.424967                | 0.043464  | -0.110917 |
| 6             | 6             | 0           | 1.198266                | 0.012207  | -0.751798 |
| 7             | 1             | 0           | -0.950999               | -0.013441 | -0.526409 |
| 8             | 1             | 0           | -0.929424               | -0.016367 | 1.948734  |
| 9             | 1             | 0           | 5.201399                | 2.031943  | 1.952080  |
| 10            | 1             | 0           | 3.351143                | 0.087744  | -0.676711 |
| 11            | 1             | 0           | 1.147366                | 0.013116  | -1.836301 |
| 12            | 7             | 0           | 1.529248                | -0.077169 | 3.374677  |
| 13            | 6             | 0           | 2.961684                | 0.105679  | 3.575395  |
| 14            | 1             | 0           | 3.402700                | -0.619766 | 4.265781  |
| 15            | 6             | 0           | 3.531420                | 0.127994  | 2.234510  |
| 16            | 1             | 0           | 4.542902                | -0.190417 | 2.025844  |
| 17            | 8             | 0           | 4.231276                | 2.101467  | 1.961896  |
| 18            | 1             | 0           | 0.869214                | 0.254476  | 4.065441  |
| 19            | 1             | 0           | 3.193370                | 1.223316  | 4.064393  |
| 20            | 8             | 0           | 3.657631                | 2.564936  | 4.259730  |
| 21            | 1             | 0           | 3.992265                | 2.469804  | 3.019531  |
| 22            | 1             | 0           | 2.865379                | 3.126908  | 4.287604  |

**Materials and Measurements.** Starting materials, if commercially available, were purchased and used as such.  $^1\text{H}$  and  $^{13}\text{C}$  nuclear magnetic resonance (NMR) spectra were recorded at 300 and 75 MHz. Chemical shifts are reported in  $\delta$  units, parts per million (ppm), and were measured relative to the signals for residual chloroform. Coupling constants ( $J$ ) are given in Hertz (Hz). Multiplicities are abbreviated as follows: singlet (s), doublet (d), triplet (t), quartet (q), multiplet (m). HRMS were recorded using TOF electrospray ionization (ESI-positive). Melting points were recorded on a Cambridge Instruments apparatus and are uncorrected. The solvents used were of spectroscopic or equivalent grade. Water was twice distilled and passed through a Millipore apparatus. All reaction mixtures were filtered through a 0.45  $\mu\text{m}$  PTFE 25 mm syringe filter.

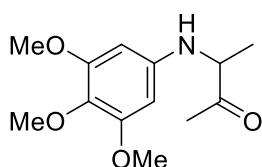

**3-((3,4,5-trimethoxyphenyl)amino)butan-2-one (2a)**<sup>1</sup> Yield: 37 %, (187 mg), Yellow oil.  $^1\text{H}$  NMR (300 MHz, Chloroform-*d*)  $\delta$  5.78 (s, 2H), 4.29 (s, 1H), 4.07 – 3.93 (m, 1H), 3.78 (s, 6H), 3.73 (s, 3H), 2.19 (s, 3H), 1.39 (d,  $J = 7.0$  Hz, 3H).  $^{13}\text{C}$  NMR (75 MHz,  $\text{CDCl}_3$ )  $\delta$  210.55, 154.11, 143.39, 130.46, 90.67, 61.11, 59.14, 56.00, 25.66, 18.07.

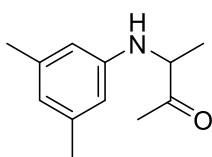

**3-((3,5-dimethylphenyl)amino)butan-2-one (2b)**: Yield: 57 % (218 mg), Yellow oil.  $^1\text{H}$  NMR (300 MHz, Chloroform-*d*)  $\delta$  6.42 (dd,  $J = 1.5, 0.7$  Hz, 1H), 6.23 (dt,  $J = 1.5, 0.8$  Hz, 2H), 4.06 (q,  $J = 7.0$  Hz, 1H), 2.26 (s, 6H), 1.42 (d,  $J = 7.0$  Hz, 3H).  $^{13}\text{C}$  NMR (75 MHz,  $\text{CDCl}_3$ )  $\delta$  210.77, 146.67, 139.12, 120.03, 110.97, 58.69, 25.73, 21.52, 18.08. HRMS (ESI-TOF)  $m/z$ : [ $\text{M} + \text{H}^+$ ] calcd for  $\text{C}_{12}\text{H}_{18}\text{NO}$  192.1383, found 192.1385. IR (ATR): 3307, 2917, 1597, 1035, 1446, 691  $\text{cm}^{-1}$ .

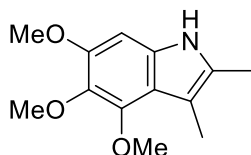

**4,5,6-trimethoxy-2,3-dimethyl-1H-indole (3a):** Yield 99% (470 mg), white solid, m.p.: 73-75 °C.  $^1\text{H}$  NMR (300 MHz, Chloroform-*d*)  $\delta$  7.54 (s, 1H), 6.55 (s, 1H), 3.98 (s, 3H), 3.88 (s, 3H), 3.86 (s, 3H), 2.33 (s, 3H), 2.28 (s, 3H).  $^{13}\text{C}$  NMR (75 MHz,  $\text{CDCl}_3$ )  $\delta$  150.15, 146.68, 136.60, 132.21, 128.99, 116.50, 106.75, 89.99, 61.87, 61.54, 56.46, 11.36, 10.13. HRMS (ESI-TOF)  $m/z$ :  $[\text{M} + \text{H}^+]$  calcd for  $\text{C}_{13}\text{H}_{18}\text{NO}_3$  236.1281, found 236.1282. IR (ATR): 3342, 2930, 1623, 1459, 1100, 625  $\text{cm}^{-1}$ .

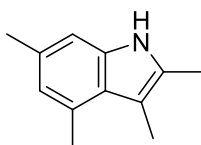

**2,3,4,6-tetramethyl-1H-indole (3b):** Yield 83% (287 mg), white solid, m.p.: 134-135 °C.  $^1\text{H}$  NMR (300 MHz, Chloroform-*d*)  $\delta$  7.50 (s, 1H), 6.87 (s, 1H), 6.62 (s, 1H), 2.66 (s, 3H), 2.39 (s, 3H), 2.38 (s, 3H), 2.31 (s, 3H).  $^{13}\text{C}$  NMR (75 MHz,  $\text{CDCl}_3$ )  $\delta$  135.97, 135.69, 130.67, 129.96, 129.56, 122.60, 108.17, 107.71, 21.54, 20.13, 11.57, 11.55. HRMS (ESI-TOF)  $m/z$ :  $[\text{M} + \text{H}^+]$  calcd for  $\text{C}_{12}\text{H}_{16}\text{N}$  174.1277, found 174.1276. IR (ATR): 3376, 2914, 1448, 1250, 1014, 831  $\text{cm}^{-1}$ .

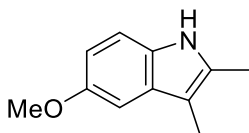

**5-methoxy-2,3-dimethyl-1H-indole (3c):**<sup>2</sup> Yield 30% (107 mg), pink solid, m.p.: 109-110 °.  $^1\text{H}$  NMR (300 MHz, Chloroform-*d*)  $\delta$  7.57 (s, 1H), 7.14 (dd,  $J = 8.7, 0.6$  Hz, 1H), 6.94 (d,  $J = 2.5$  Hz, 1H), 6.77 (dd,  $J = 8.7, 2.5$  Hz, 1H), 3.87 (s, 3H), 2.34 (d,  $J = 0.8$  Hz, 3H), 2.20 (d,  $J = 0.7$  Hz, 3H).  $^{13}\text{C}$  NMR (75 MHz,  $\text{CDCl}_3$ )  $\delta$  153.97, 131.79, 130.41, 129.97, 110.79, 110.61, 107.13, 100.58, 56.11, 11.78, 8.66. HRMS (ESI-TOF)  $m/z$ :  $[\text{M} + \text{H}^+]$  calcd for  $\text{C}_{11}\text{H}_{14}\text{NO}$  176.1070, found 176.1074.

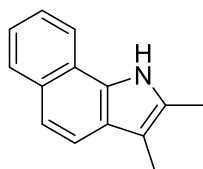

**2,3-dimethyl-1H-benzo[g]indole (3d):**<sup>3</sup> Yield 79% (308 mg), yellowish solid, m.p.: 146-148°. <sup>1</sup>H NMR (300 MHz, Chloroform-*d*)  $\delta$  8.42 (s, 1H), 7.98 – 7.88 (m, 2H), 7.62 (dd, *J* = 8.5, 0.7 Hz, 1H), 7.50 (dd, *J* = 8.4, 0.9 Hz, 1H), 7.50 – 7.45 (m, 1H), 7.41 – 7.35 (m, 1H), 2.47 (d, *J* = 0.7 Hz, 3H), 2.31 (d, *J* = 0.8 Hz, 3H). <sup>13</sup>C NMR (75 MHz, CDCl<sub>3</sub>)  $\delta$  130.10, 129.30, 129.04, 128.96, 125.26, 125.08, 123.23, 121.39, 119.87, 119.22, 118.79, 109.08, 11.80, 8.76. HRMS (ESI-TOF) *m/z*: [M+ H<sup>+</sup>] calcd for C<sub>14</sub>H<sub>14</sub>N 196.1121, found 196.1123.

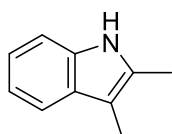

**2,3-dimethyl-1H-indole (3e):**<sup>4</sup> Yield 70% (203 mg), white solid, m.p.: 104-105 °C. <sup>1</sup>H NMR (300 MHz, Chloroform-*d*)  $\delta$  7.75 (s, 1H), 7.67 – 7.61 (m, 1H), 7.41 – 7.37 (m, 1H), 7.31 – 7.21 (m, 2H), 2.50 (d, *J* = 0.8 Hz, 3H), 2.39 (d, *J* = 0.7 Hz, 3H). <sup>13</sup>C NMR (75 MHz, CDCl<sub>3</sub>)  $\delta$  135.29, 130.76, 129.53, 120.99, 119.11, 118.05, 110.14, 107.21, 11.63, 8.57. HRMS (ESI-TOF) *m/z*: [M+ H<sup>+</sup>] calcd for C<sub>10</sub>H<sub>12</sub>N 146.0964, found 146.0958.

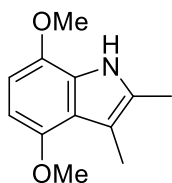

**4,7-dimethoxy-2,3-dimethyl-1H-indole (3f):**<sup>5</sup> Yield 99% (410 mg), pink solid, m.p.: 102-103 °C. <sup>1</sup>H NMR (300 MHz, Chloroform-*d*)  $\delta$  7.97 (s, 1H), 6.44 (d, *J* = 8.3 Hz, 1H), 6.34 (d, *J* = 8.3 Hz, 1H), 3.91 (s, 3H), 3.88 (s, 3H), 2.40 (d, *J* = 0.7 Hz, 3H), 2.31 (d, *J* = 0.8 Hz, 3H). <sup>13</sup>C NMR (75 MHz, CDCl<sub>3</sub>)  $\delta$  149.04, 140.56, 129.13, 126.77, 120.32, 107.88, 100.73, 98.85, 55.86, 55.77, 11.35, 10.55. HRMS (ESI-TOF) *m/z*: [M+ H<sup>+</sup>] calcd for C<sub>12</sub>H<sub>16</sub>NO<sub>2</sub> 206.1176, found 206.1179.



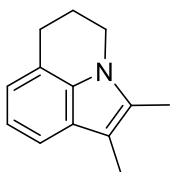

**1,2-dimethyl-5,6-dihydro-4H-pyrrolo[3,2,1-*ij*] quinoline (3g):**<sup>6</sup> Yield 86% (319 mg), yellowish solid, m.p.: 86-87 °C. <sup>1</sup>H NMR (300 MHz, Chloroform-*d*) δ 7.35 (dd, *J* = 7.9, 1.0 Hz, 1H), 7.02 (dd, *J* = 7.9, 7.0 Hz, 1H), 6.88 (dd, *J* = 7.0, 1.0 Hz, 1H), 4.09 – 3.98 (m, 2H), 3.01 (t, *J* = 6.2 Hz, 2H), 2.37 (s, 3H), 2.30 (s, 3H), 2.32 – 2.20 (m, 2H). <sup>13</sup>C NMR (75 MHz, CDCl<sub>3</sub>) δ 133.78, 131.42, 126.36, 120.80, 118.77, 117.53, 115.48, 105.87, 41.51, 24.96, 23.15, 9.64, 8.98. HRMS (ESI-TOF) *m/z*: [M+ H<sup>+</sup>] calcd for C<sub>13</sub>H<sub>16</sub>N 186.1277, found 186.1274.

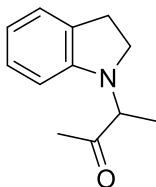

**3-(indolin-1-yl)butan-2-one (2d):**<sup>7</sup> Yield 80% (303 mg), yellow oil. <sup>1</sup>H NMR (300 MHz, Chloroform-*d*) δ 7.12 – 7.01 (m, 2H), 6.67 (td, *J* = 7.4, 1.0 Hz, 1H), 6.35 – 6.31 (m, 1H), 4.07 (q, *J* = 7.0 Hz, 1H), 3.53 – 3.33 (m, 2H), 3.07 – 2.96 (m, 2H), 2.22 (s, 3H), 1.29 (d, *J* = 7.0 Hz, 3H). <sup>13</sup>C NMR (75 MHz, CDCl<sub>3</sub>) δ 209.80, 150.49, 130.05, 127.49, 124.86, 118.00, 106.60, 60.96, 48.95, 28.47, 27.38, 11.01. HRMS (ESI-TOF) *m/z*: [M+ H<sup>+</sup>] calcd for C<sub>12</sub>H<sub>16</sub>NO 190.1226, found 190.1226.

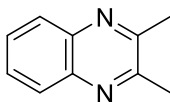

**2,3-dimethylquinoxaline (4):**<sup>8</sup> Yield 88% (278 mg), white solid, m.p.:

842 mg, 88% yield, oil. <sup>1</sup>H NMR (300 MHz, CDCl<sub>3</sub>) δ: 8.07 (bs, 1H), 7.04 (dd, *J* = 3.3, 2.4 Hz, 1H), 6.65 (d, *J* = 0.8 Hz, 1H), 6.65 (ddd, *J* = 3.2, 2.2, 0.9 Hz, 1H), 4.11 (s, 3H), 3.88 (s, 6H). <sup>13</sup>C NMR (75 MHz, CDCl<sub>3</sub>) δ: 151.3 (2C, C), 146.1 (1C, C), 132.9 (1C, C), 122.3 (1C, CH), 115.1 (1C, C), 100.5 (1C, CH), 89.6 (1C, CH), 61.7 (1C, CH<sub>3</sub>), 60.8 (1C, CH<sub>3</sub>), 56.4 (1C, CH<sub>3</sub>).

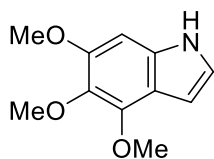

**4,5,6-trimethoxy-1H-indole (5):**<sup>9</sup> 75% yield, 357 mg, oil. <sup>1</sup>H NMR (300 MHz, CDCl<sub>3</sub>) δ: 8.07 (bs, 1H), 7.04 (dd, *J* = 3.3, 2.4 Hz, 1H), 6.65 (d, *J* = 0.8 Hz, 1H), 6.65 (ddd, *J* = 3.2, 2.2, 0.9 Hz, 1H), 4.11 (s, 3H), 3.88 (s, 6H). <sup>13</sup>C NMR (75 MHz, CDCl<sub>3</sub>) δ: 151.3 (2C, C), 146.1 (1C, C), 132.9 (1C, C), 122.3 (1C, CH), 115.1 (1C, C), 100.5 (1C, CH), 89.6 (1C, CH), 61.7 (1C, CH<sub>3</sub>), 60.8 (1C, CH<sub>3</sub>), 56.4 (1C, CH<sub>3</sub>).

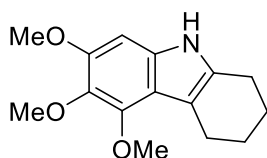

**5,6,7-trimethoxy-2,3,4,9-tetrahydro-1H-carbazole (7a):** Yield 98% (512 mg), oil. <sup>1</sup>H NMR (300 MHz, Chloroform-*d*) δ 7.60 (s, 1H), 6.57 (s, 1H), 3.98 (s, 3H), 3.88 (s, 3H), 3.85 (s, 3H), 2.92 – 2.86 (m, 2H), 2.68 – 2.64 (m, 2H), 1.91 – 1.81 (m, 4H). <sup>13</sup>C NMR (75 MHz, CDCl<sub>3</sub>) δ 150.18, 146.44, 136.51, 132.56, 132.32, 115.45, 109.48, 90.42, 61.97, 61.56, 56.50, 23.69, 23.35, 23.12, 22.66. HRMS (ESI-TOF) *m/z*: [M+ H<sup>+</sup> + 2H<sub>2</sub>O] calcd for C<sub>15</sub>H<sub>20</sub>NO<sub>5</sub> 294.1336, found 294.1337. IR (ATR): 2935, 1597, 1463, 1102, 997, 727 cm<sup>-1</sup>.

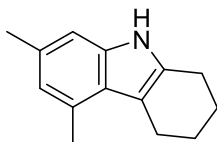

**5,7-dimethyl-2,3,4,9-tetrahydro-1H-carbazole (7b):**<sup>10</sup> Yield 35% (139 mg), white solid, m.p.: 141-142 °C. <sup>1</sup>H NMR (300 MHz, Chloroform-*d*) δ 7.49 (s, 1H), 6.88 (dt, *J* = 1.5, 0.7 Hz, 1H), 6.62 (dt, *J* = 1.6, 0.8 Hz, 1H), 3.04 – 2.92 (m, 2H), 2.69-2.67 (m, 2H), 2.61 (s, 3H), 2.38 (s, 3H), 1.87-1.75 (m, 4H). <sup>13</sup>C NMR (75 MHz, CDCl<sub>3</sub>) δ 136.23, 132.86, 130.78, 129.85, 124.65, 122.29, 110.44, 108.28, 23.95, 23.73, 23.54, 22.95, 21.61, 19.86. HRMS (ESI-TOF) *m/z*: [M+ H<sup>+</sup>] calcd for C<sub>14</sub>H<sub>18</sub>N 200.1434, found 200.1426.

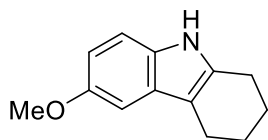

**6-methoxy-2,3,4,9-tetrahydro-1H-carbazole (7c):**<sup>11</sup> Yield 41% (165 mg), pink solid, m.p.: 168-169 °C. <sup>1</sup>H NMR (300 MHz, Chloroform-*d*) δ 7.58 (s, 1H), 7.16 (dd, *J* = 8.7, 0.6 Hz, 1H), 6.93 (d, *J* = 2.5 Hz, 1H), 6.77 (dd, *J* = 8.7, 2.5 Hz, 1H), 3.86 (s, 3H), 2.70-2.68 (m, 4H), 1.98 – 1.80 (m, 4H). <sup>13</sup>C NMR (75 MHz, CDCl<sub>3</sub>) δ 154.00, 135.24, 130.86, 128.35, 111.07, 110.65, 110.17, 100.43, 56.12, 23.48, 23.45, 23.35, 21.10. HRMS (ESI-TOF) *m/z*: [M+ H<sup>+</sup>] calcd for C<sub>13</sub>H<sub>16</sub>NO 202.1226, found 202.1222.

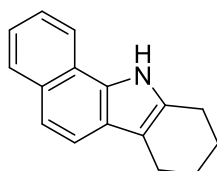

**8,9,10,11-tetrahydro-7H-benzo[*a*]carbazole (7d):**<sup>10</sup> Yield 35% (155 mg), pink-white solid, m.p.: 139-140 °C. <sup>1</sup>H NMR (300 MHz, Chloroform-*d*) δ 8.41 (s, 1H), 7.95 – 7.86 (m, 2H), 7.61 (dd, *J* = 8.6, 0.7 Hz, 1H), 7.55 – 7.44 (m, 2H), 7.37 (ddd, *J* = 8.1, 6.9, 1.3 Hz, 1H), 2.94 – 2.72 (m, 4H), 1.97-1.93 (m, 4H). <sup>13</sup>C NMR (75 MHz, CDCl<sub>3</sub>) δ 132.37, 130.18, 129.79, 129.07, 125.26, 123.46, 123.20, 121.63, 119.95, 119.26, 118.60, 112.13, 23.52, 23.46, 23.46, 21.20. HRMS (ESI-TOF) *m/z*: [M+ H<sup>+</sup>] calcd for C<sub>16</sub>H<sub>16</sub>N 222.1277, found 222.1273.

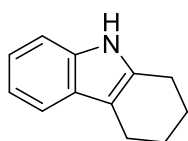

**6,7,8,9-tetrahydro-1H-carbazole (7e):**<sup>12</sup> Yield 45% (154 mg), white solid, m.p.: 117-118 °C. <sup>1</sup>H NMR (300 MHz, Chloroform-*d*) δ 7.66 (s, 1H), 7.49 – 7.44 (m, 1H), 7.28 (dd, *J* = 6.8, 1.7 Hz, 1H), 7.17 – 7.03 (m, 2H), 2.78 – 2.66 (m, 4H), 1.93-1.87 (m, 1H). <sup>13</sup>C NMR (75 MHz, CDCl<sub>3</sub>) δ 135.76, 134.20, 127.95, 121.12, 119.23, 117.86, 110.44, 110.32, 23.43, 23.39, 23.35, 21.05. HMRS (ESI-TOF) *m/z*: [M+H<sup>+</sup>] calcd for C<sub>12</sub>H<sub>14</sub>N 172.1120, found 172.1119.

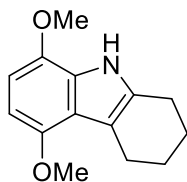

**5,8-dimethoxy-2,3,4,9-tetrahydro-1H-carbazole (7f):**<sup>5</sup> Yield 33% (153 mg), white solid, m.p.: 97-98 °C. <sup>1</sup>H NMR (300 MHz, Chloroform-*d*) δ 7.91 (s, 1H), 6.44 (d, *J* = 8.3 Hz, 1H), 6.33 (d, *J* = 8.3 Hz, 1H), 3.90 (s, 3H), 3.86 (s, 3H), 2.98 – 2.89 (m, 2H), 2.75 – 2.67 (m, 2H), 1.96 – 1.77 (m, 4H). <sup>13</sup>C NMR (75 MHz, CDCl<sub>3</sub>) δ 148.97, 140.83, 132.28, 127.12, 119.23, 110.63, 101.06, 98.95, 55.94, 55.88, 23.75, 23.36, 23.10, 23.08. HRMS (ESI-TOF) *m/z*: [M+ H<sup>+</sup>] calcd for C<sub>14</sub>H<sub>18</sub>NO<sub>2</sub> 232.1332, found 232.1332.

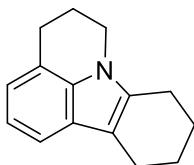

**5,6,8,9,10,11-hexahydro-4H-pyrido[3,2,1-*jk*]carbazole (7g):** Yield 67% (283 mg), white solid, m.p.: 59-60 °C. <sup>1</sup>H NMR (300 MHz, Chloroform-*d*) δ 7.30 (dd, *J* = 7.9, 0.9 Hz, 1H), 6.98 (dd, *J* = 7.9, 7.1 Hz, 1H), 6.85 (dd, *J* = 7.1, 1.1 Hz, 1H), 4.04 – 3.94 (m, 2H), 3.07 – 2.92 (m, 2H), 2.82 – 2.64 (m, 4H), 2.32 – 2.15 (m, 2H), 1.93-1.86 (m, 4H). <sup>13</sup>C NMR (75 MHz, CDCl<sub>3</sub>) δ 134.53, 134.05, 124.97, 120.99, 118.86, 117.69, 115.38, 108.93, 41.10, 25.09, 23.60, 23.28, 23.05, 21.82, 21.51. HRMS (ESI-TOF) *m/z*: [M+ H<sup>+</sup>] calcd for C<sub>12</sub>H<sub>18</sub>N 212.1434, found 212.1434. IR (ATR): 2928, 2854, 1477, 1073, 802, 667 cm<sup>-1</sup>.

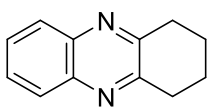

**1,2,3,4-tetrahydrophenazine (8):**<sup>13</sup> Yield 23% (85 mg), pink solid, m.p.: 93-94 °C. <sup>1</sup>H NMR (300 MHz, Chloroform-*d*) δ 8.02 – 7.91 (m, 2H), 7.69 – 7.61 (m, 2H), 3.18-3.14 (m, 4H), 2.2-1.98 (m, 4). <sup>13</sup>C NMR (75 MHz, CDCl<sub>3</sub>) δ 154.28, 141.32, 129.08, 128.45, 33.33, 22.93. HRMS (ESI-TOF) *m/z*: [M+ H<sup>+</sup>] calcd for C<sub>12</sub>H<sub>13</sub>N<sub>2</sub> 185.1073, found 185.1079.

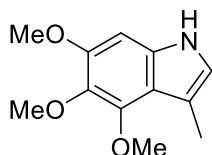

**4,5,6-trimethoxy-3-methyl-1H-indole (9a):**<sup>9</sup> Yield 66% (292 mg), oil. <sup>1</sup>H NMR (300 MHz, Chloroform-*d*)  $\delta$  7.86 (s, 1H), 6.54 (d, *J* = 0.9 Hz, 1H), 6.24 (dt, *J* = 2.1, 1.0 Hz, 1H), 4.08 (s, 3H), 3.87 (s, 3H), 3.85 (s, 3H), 2.38 (d, *J* = 1.0 Hz, 3H). <sup>13</sup>C NMR (75 MHz, CDCl<sub>3</sub>)  $\delta$  150.21, 145.19, 135.54, 133.11, 115.79, 97.93, 89.55, 61.62, 60.69, 56.44, 13.67. HRMS (ESI-TOF) *m/z*: [M+ H<sup>+</sup>] calcd for C<sub>12</sub>H<sub>16</sub>NO<sub>3</sub> 222.1125, found 222.1127.

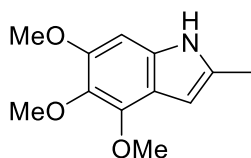

**4,5,6-trimethoxy-2-methyl-1H-indole (9b):** Yield 13% (58 mg), yellowish solid, m.p.: 88-89 °C. <sup>1</sup>H NMR (300 MHz, Chloroform-*d*)  $\delta$  7.71 (s, 1H), 6.75 (dq, *J* = 2.3, 1.1 Hz, 1H), 6.61 (s, 1H), 4.00 (s, 3H), 3.88 (s, 3H), 3.87 (s, 3H), 2.43 (d, *J* = 1.1 Hz, 3H). <sup>13</sup>C NMR (75 MHz, CDCl<sub>3</sub>)  $\delta$  151.16, 147.37, 136.61, 133.57, 120.29, 115.66, 111.85, 90.20, 61.85, 61.54, 56.37, 11.63. HRMS (ESI-TOF) *m/z*: [M+ H<sup>+</sup>] calcd for C<sub>12</sub>H<sub>16</sub>NO<sub>3</sub> 222.1125, found 222.1125. IR (ATR) : 3340, 2925, 1621, 1439, 1110, 632 cm<sup>-1</sup>.

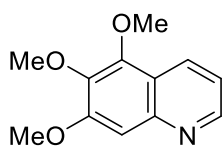

**5,6,7-trimethoxyquinoline (10a):** Yield 38% (167 mg), oil. <sup>1</sup>H NMR (300 MHz, Chloroform-*d*)  $\delta$  8.77 (dd, *J* = 4.3, 1.8 Hz, 1H), 8.35 (ddd, *J* = 8.3, 1.8, 0.7 Hz, 1H), 7.29 – 7.24 (m, 2H), 4.07 (s, 3H), 4.01 (s, 3H), 3.99 (s, 3H). <sup>13</sup>C NMR (75 MHz, CDCl<sub>3</sub>)  $\delta$  155.98, 149.80, 146.95, 146.16, 140.91, 130.32, 119.43, 118.91, 104.20, 61.66, 61.31, 56.14. HRMS (ESI-TOF) *m/z*: [M+ H<sup>+</sup>] calcd for C<sub>12</sub>H<sub>14</sub>NO<sub>3</sub> 220.1968, found 220.0963. IR (ATR): 2939, 1615, 1477, 1236, 1120, 811 cm<sup>-1</sup>.

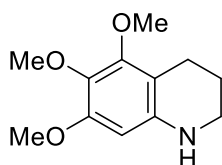

**5,6,7-trimethoxy-1,2,3,4-tetrahydroquinoline (10b):**<sup>14</sup> Yield 5% (22 mg), yellow oil. <sup>1</sup>H NMR (300 MHz, Chloroform-*d*)  $\delta$  5.87 (s, 1H), 3.85 (s, 3H), 3.77 (s, 3H), 3.77 (s, 3H), 3.27 – 3.18 (m, 2H), 2.65 (t, *J* = 6.5 Hz, 2H), 1.97 – 1.84 (m, 2H). <sup>13</sup>C NMR (75 MHz, CDCl<sub>3</sub>)  $\delta$  152.23, 152.09, 141.18, 133.99, 107.53, 94.46, 61.25, 60.56, 55.99, 42.06, 22.16, 20.75. HRMS (ESI-TOF) *m/z*: [M+ H<sup>+</sup>] calcd for C<sub>12</sub>H<sub>18</sub>NO<sub>3</sub> 224.1281, found 224.1285.

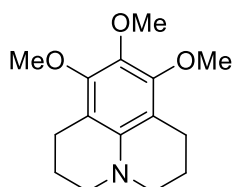

**3,4,5-trimethoxyjulolidine (10c):** Yield 4% (21 mg), white solid, m.p.: 89-90 °C. <sup>1</sup>H NMR (300 MHz, Chloroform-*d*)  $\delta$  3.82 (s, 6H), 3.82 (s, 3H), 3.10 – 2.96 (m, 4H), 2.69 (t, *J* = 6.7 Hz, 4H), 1.97-1.94 (m, 4H). <sup>13</sup>C NMR (75 MHz, CDCl<sub>3</sub>)  $\delta$  149.65, 139.95, 127.87, 111.18, 61.12, 60.51, 50.20, 22.04, 21.52. HRMS (ESI-TOF) *m/z*: [M+ H<sup>+</sup>] calcd for C<sub>15</sub>H<sub>22</sub>NO<sub>3</sub> 264.1594, found 264.1599. IR (ATR): 2922, 1461, 1287, 1091, 1018, 801 cm<sup>-1</sup>.

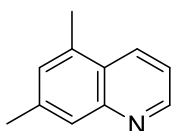

**5,7-dimethylquinoline (11a):**<sup>15</sup> Yield 62% (21 mg), yellowish oil. <sup>1</sup>H NMR (300 MHz, Chloroform-*d*)  $\delta$  8.86 (dd, *J* = 4.2, 1.7 Hz, 1H), 8.26 (ddd, *J* = 8.5, 1.7, 0.9 Hz, 1H), 7.76 – 7.72 (m, 1H), 7.34 (dd, *J* = 8.5, 4.2 Hz, 1H), 7.22 (s, 1H), 2.64 (d, *J* = 0.8 Hz, 3H), 2.52 (d, *J* = 1.0 Hz, 3H). <sup>13</sup>C NMR (75 MHz, CDCl<sub>3</sub>)  $\delta$  150.04, 148.98, 139.45, 134.27, 132.35, 129.50, 126.75, 125.83, 120.01, 21.94, 18.60. HRMS (ESI-TOF) *m/z*: [M+ H<sup>+</sup>] calcd for C<sub>11</sub>H<sub>12</sub>N 158.0964, found 158.0962.

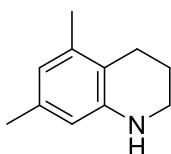

**5,7-dimethyl-1,2,3,4-tetrahydroquinoline (11b):**<sup>16</sup> Yield 7% (20 mg), yellow oil. <sup>1</sup>H NMR (300 MHz, Chloroform-*d*)  $\delta$  6.36 (s, 1H), 6.21 (s, 1H), 3.29 – 3.14 (m, 2H), 2.60 (t,  $J$  = 6.6 Hz, 2H), 2.19 (s, 3H), 2.14 (s, 3H), 2.04 – 1.90 (m, 2H). <sup>13</sup>C NMR (75 MHz, CDCl<sub>3</sub>)  $\delta$  145.00, 137.24, 135.93, 120.18, 117.44, 113.11, 41.80, 23.92, 22.86, 21.10, 19.39. HRMS (ESI-TOF)  $m/z$ : [M+ H<sup>+</sup>] calcd for C<sub>11</sub>H<sub>16</sub>N 162.1277, found 162.1279.

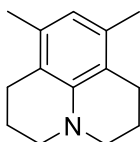

**3,5-Dimethyljulolidine (11c):**<sup>17</sup> Yield 17% (69 mg), yellow solid, m.p.: 70-71 °C. <sup>1</sup>H NMR (300 MHz, Chloroform-*d*)  $\delta$  6.38 (s, 1H), 3.13 – 2.99 (m, 4H), 2.63 (t,  $J$  = 6.8 Hz, 4H), 2.16 – 2.08 (s, 6H), 2.10-2.98 (m, 4H). <sup>13</sup>C NMR (75 MHz, CDCl<sub>3</sub>)  $\delta$  143.87, 133.97, 120.51, 118.51, 50.36, 25.01, 22.57, 19.67. HRMS (ESI-TOF)  $m/z$ : [M+ H<sup>+</sup>] calcd for C<sub>14</sub>H<sub>20</sub>N 202.1590, found 264.1583.

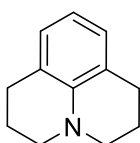

**Julolidine (12c):**<sup>18</sup> Yield 10% (35 mg), white solid, m.p.: 40 - 41 °C. <sup>1</sup>H NMR (300 MHz, Chloroform-*d*)  $\delta$  6.78 (dt,  $J$  = 7.4, 0.9 Hz, 2H), 6.49 (t,  $J$  = 7.4 Hz, 1H), 3.22 – 3.05 (m, 4H), 2.76 (t,  $J$  = 6.5 Hz, 4H), 2.08 – 1.90 (m, 4H). <sup>13</sup>C NMR (75 MHz, CDCl<sub>3</sub>)  $\delta$  143.11, 127.06, 121.72, 115.86, 50.20, 27.79, 22.26. HRMS (ESI-TOF)  $m/z$ : [M+ H<sup>+</sup>] calcd for C<sub>12</sub>H<sub>16</sub>N 174.12827, found 174.1282.

## References

- [1]. A. Fuerstner, M. Alcarazo, V. Cesar, C. Lehmann, *Chem. Commun.* **2006**, 20, 2176.
- [2] H. J. Roth, P. Lepke, *Arch. Pharm.* **1972**, 305, 159.
- [3]. M. Tursky, L. L. R. Lorentz-Petersen, L. B. Olsen, R. Madsen, *Org. Biomol. Chem.* **2010**, 8, 5576.
- [4]. K. G. Liu, A.J. Robichaud, J. R. Lo, J. F. Mattes, Y. Cai, *Org. Lett.* **2006**, 8, 5769.
- [5]. A. Blackhall, R. H. Thomson, *J. Chem. Soc.* **1954**, 3916.
- [6]. S. A. Scholl, H. Wadepohl, L. H. Gade, *Organometallics* **2013**, 32, 937.
- [7]. R. Viswanathan, E. N. Prabhakaran, M. A. Plotkin, J. N. Johnston, *J. Am. Chem. Soc.* **2003**, 125, 163.
- [8]. M. K. Sahoo, E. Balaraman, *Green Chem.* **2019**, 21, 2119.
- [9]. P. J. Llabres-Campaner, R. Ballesteros-Garrido, R. Ballesteros, B. Abarca, *J. Org. Chem.* **2018**, 83, 521.
- [10]. M. Peña-López, H. Neumann, M. Beller, *Chem. Eur. J.* **2014**, 20, 1818.
- [11]. Y. Lin, J. Ye, W. Zhang, Y. Gao, Y. Chen, *Adv. Synth. Catal.* **2019**, 361, 432.
- [12]. G. Adam, J. Andrieux, M. Plat, *Tetrahedron* **1985**, 41, 399.
- [13]. W-H Tang, Y-H Liu, S-M Peng, S-T Liu, *J. Organomet. Chem.* **2015**, 775, 94.
- [14]. J. Toda, M. Sakagami, T. Sano, *Chem. Pharm. Bull.* **1999**, 47, 1269.
- [15]. X. Yi, C. Xi, *Org. Lett.* **2015**, 17, 5836.
- [16]. R. A. Abramovitch, A. O. Kress, S. P. McManus, M. R. Smith, *J. Org. Chem.* **1984**, 49, 3114.
- [17]. Z. E. X. Dance, M. J. Ahrens, A. M. Vega, A. Butler Ricks, D. W. McCamant, M. A. Ratner, M. R. Wasielewski, *J. Am. Chem. Soc.* **2008**, 130, 830.
- [18]. A. Labeled, F. Jiang, I. Labeled, A. Lator, M. Peters, M. Achard, A. Kabouche, Z. Kabouche, G. V. M. Sharma, C. Bruneau, *ChemCatChem* **2015**, 7, 7090.



# <sup>1</sup>H- and <sup>13</sup>C NMR spectra

## 3-((3,4,5-trimethoxyphenyl)amino)butan-2-one (2a)

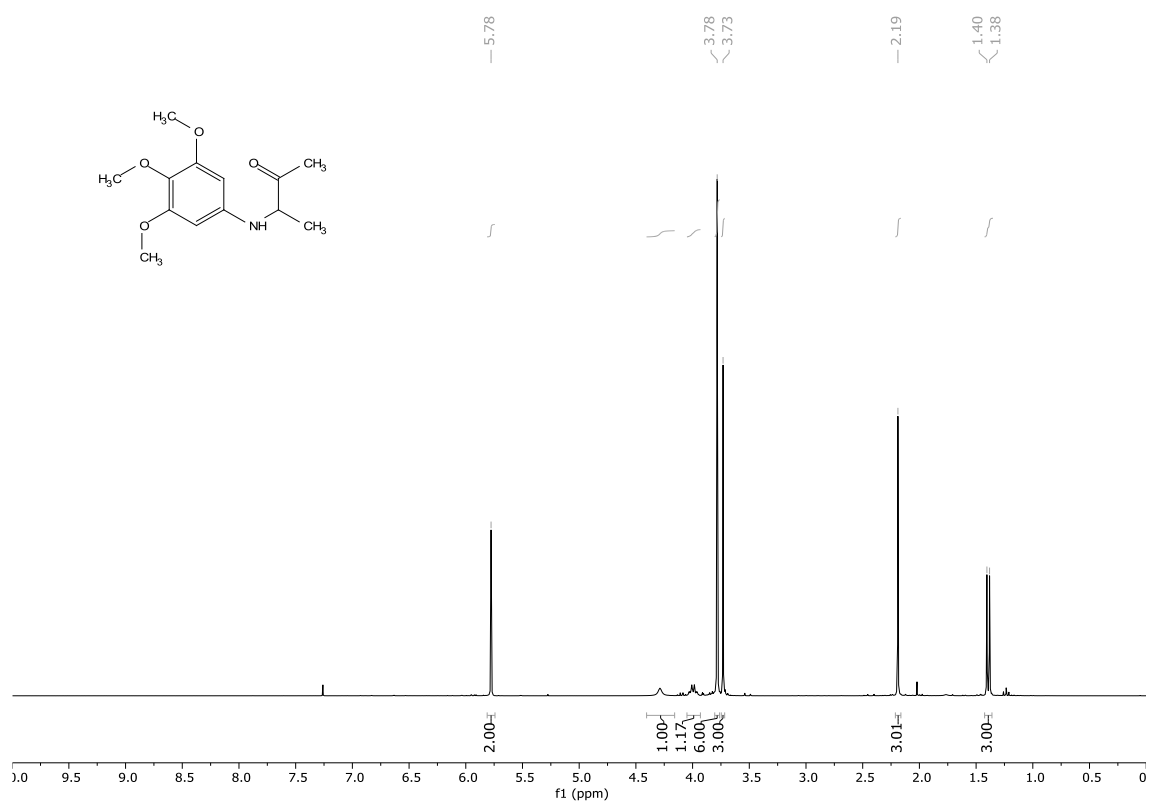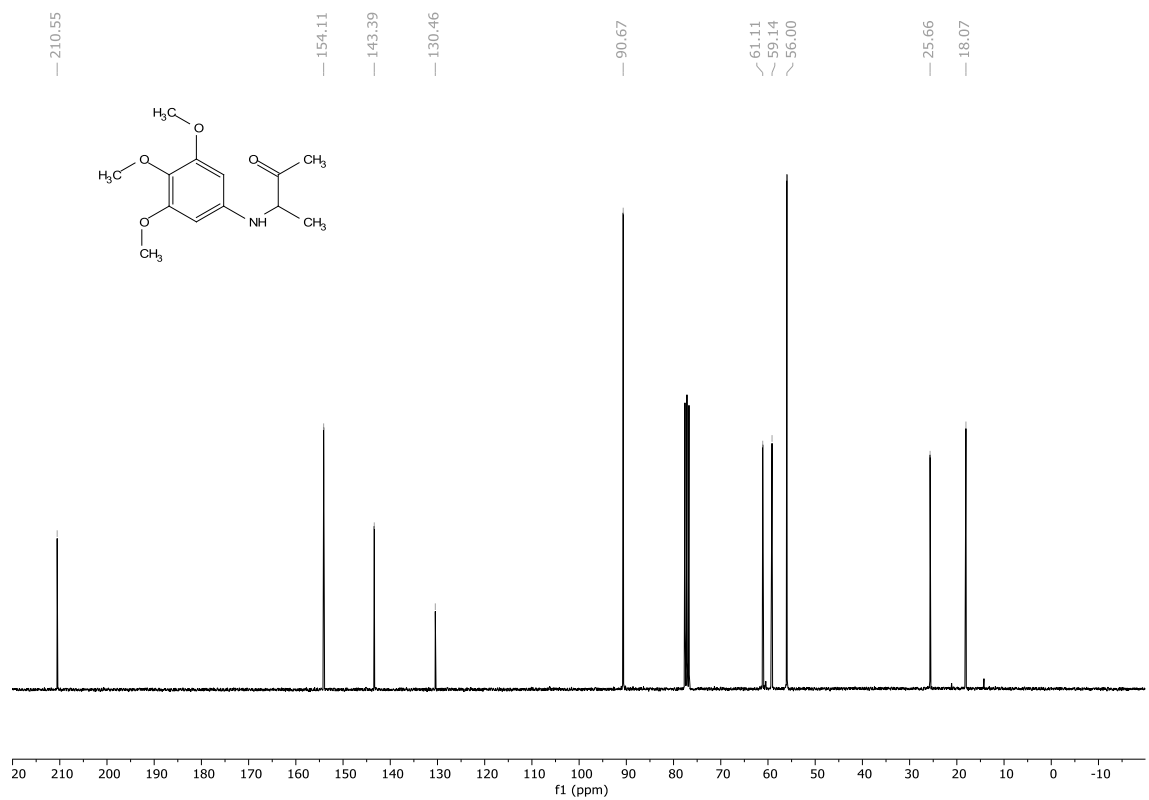

### 3-((3,5-dimethylphenyl)amino)butan-2-one (2b):

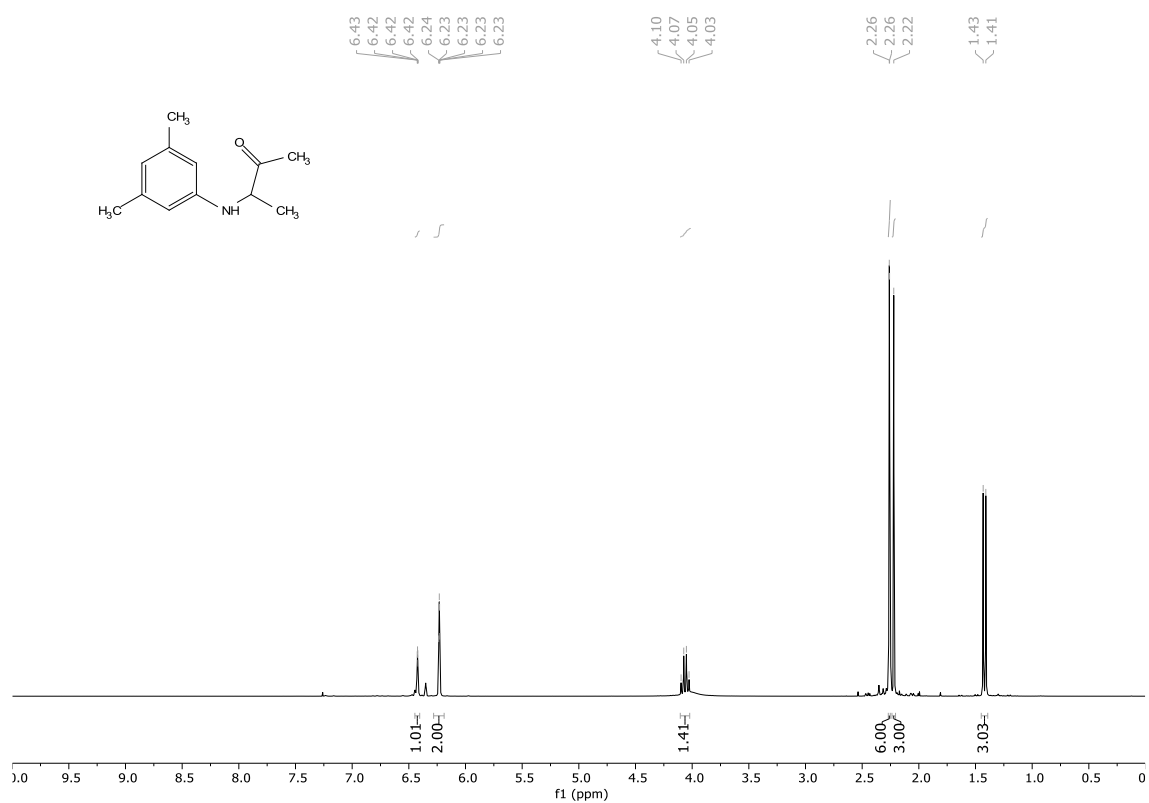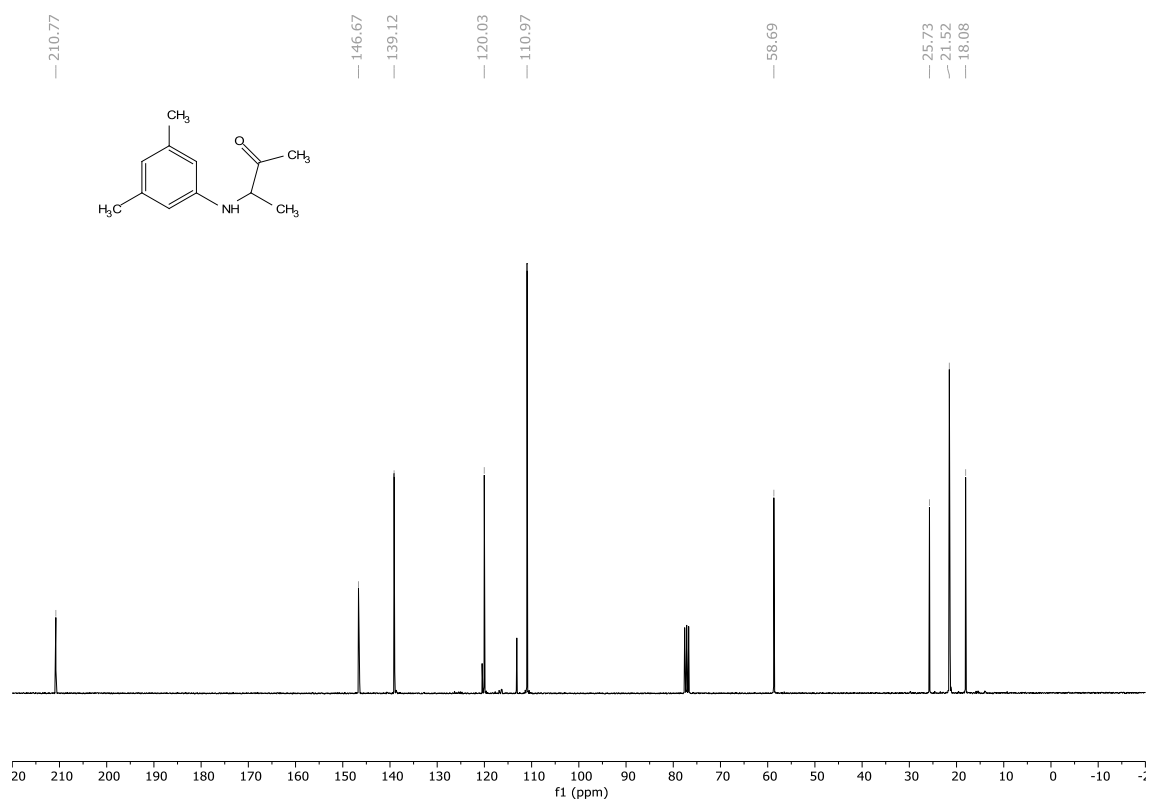

### 4,5,6-trimethoxy-2,3-dimethyl-1*H*-indole (3a):

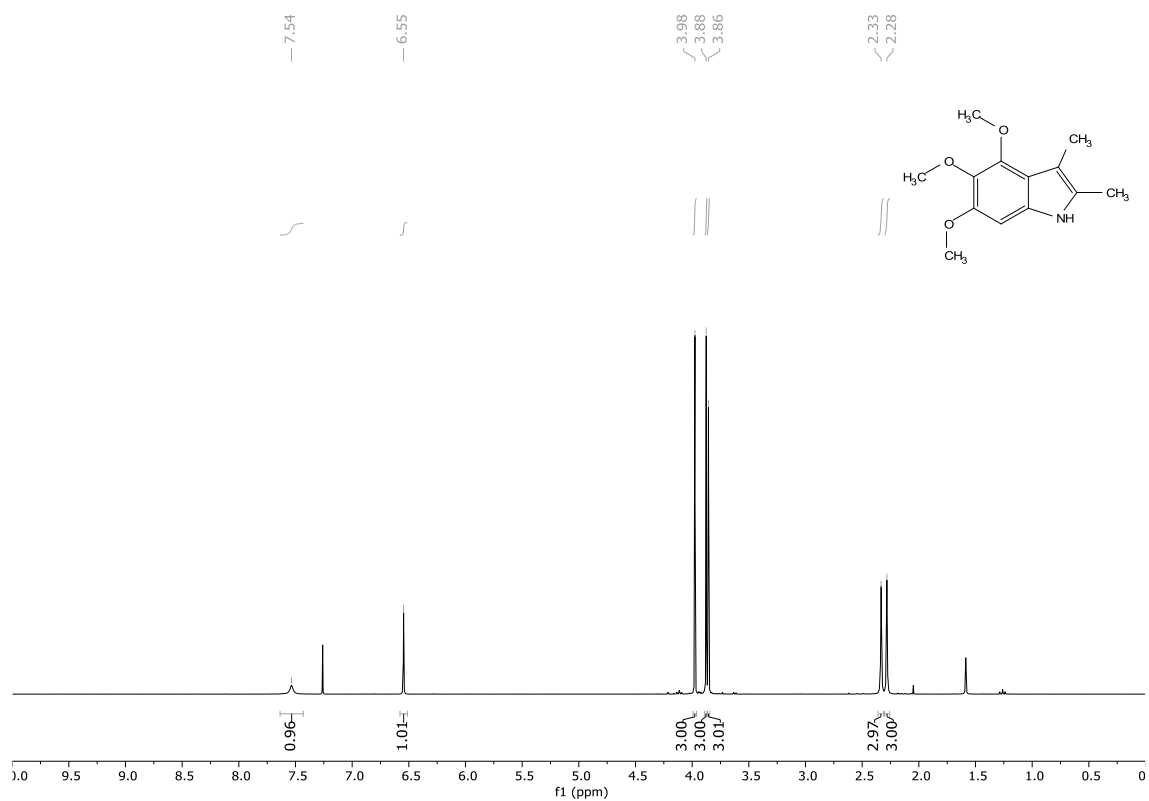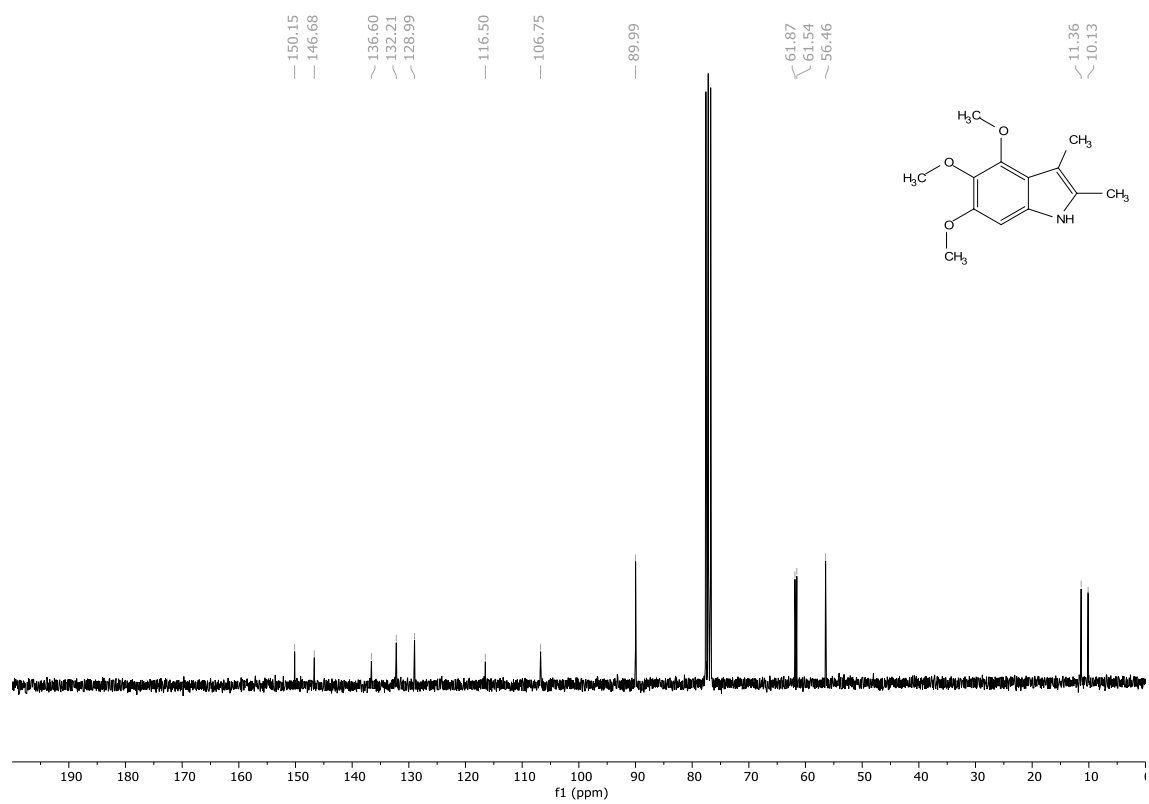

## 2,3,4,6-tetramethyl-1H-indole (3b)

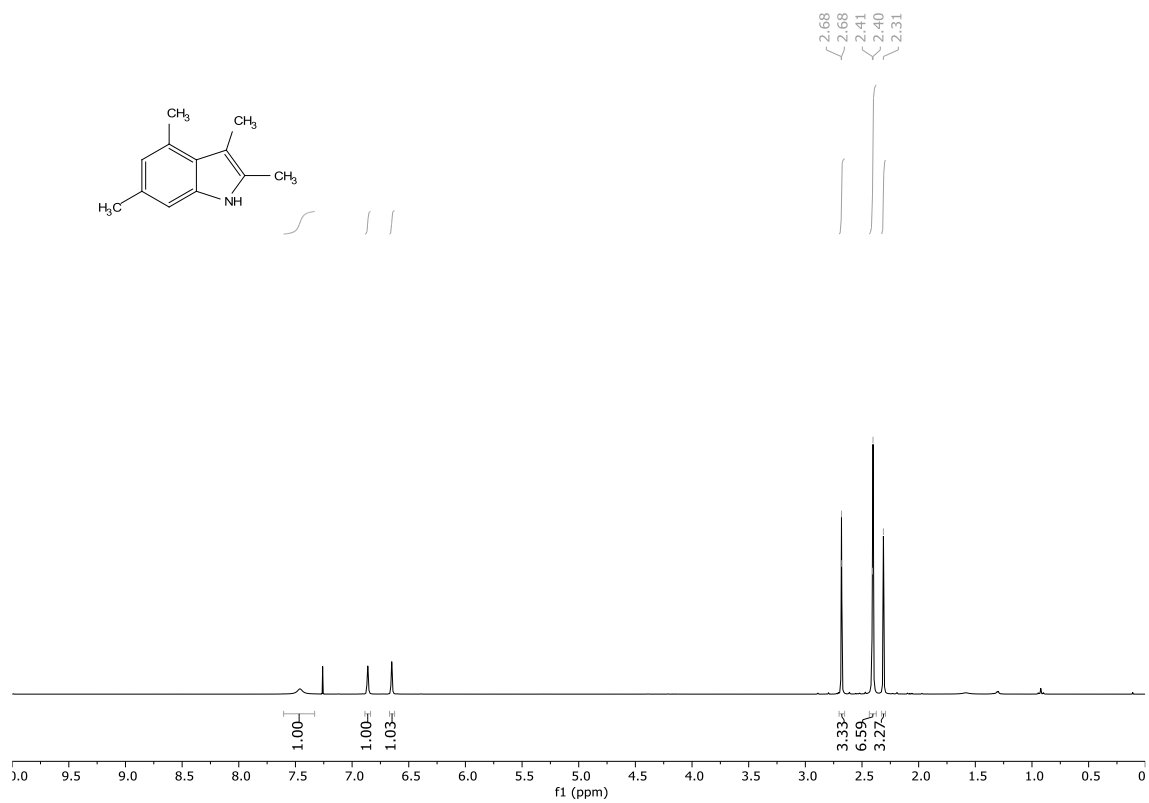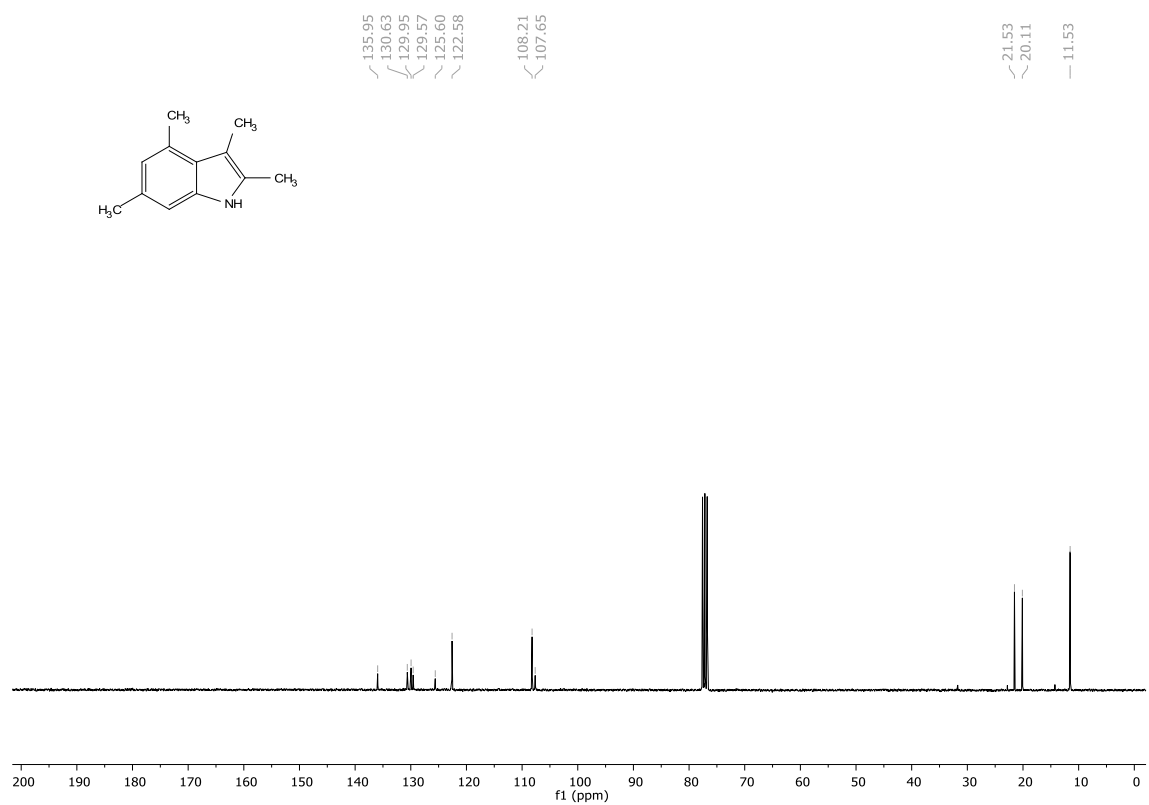

**5-methoxy-2,3-dimethyl-1H-indole (3c):**

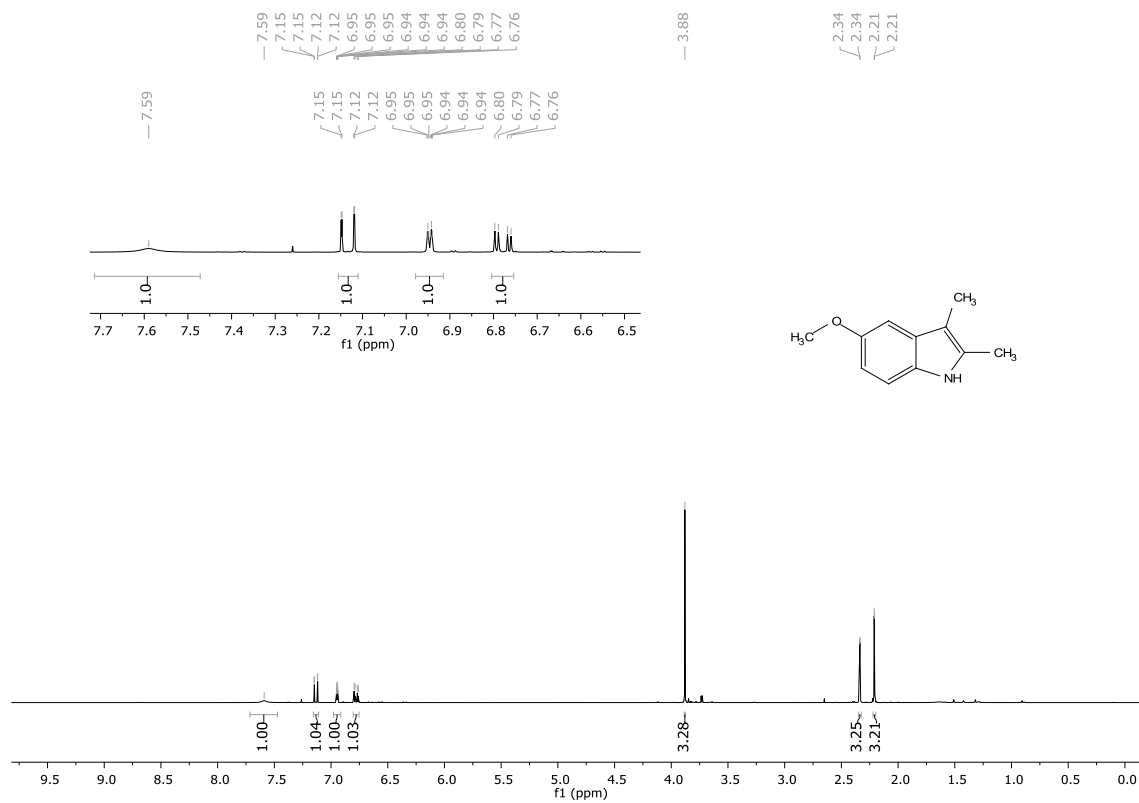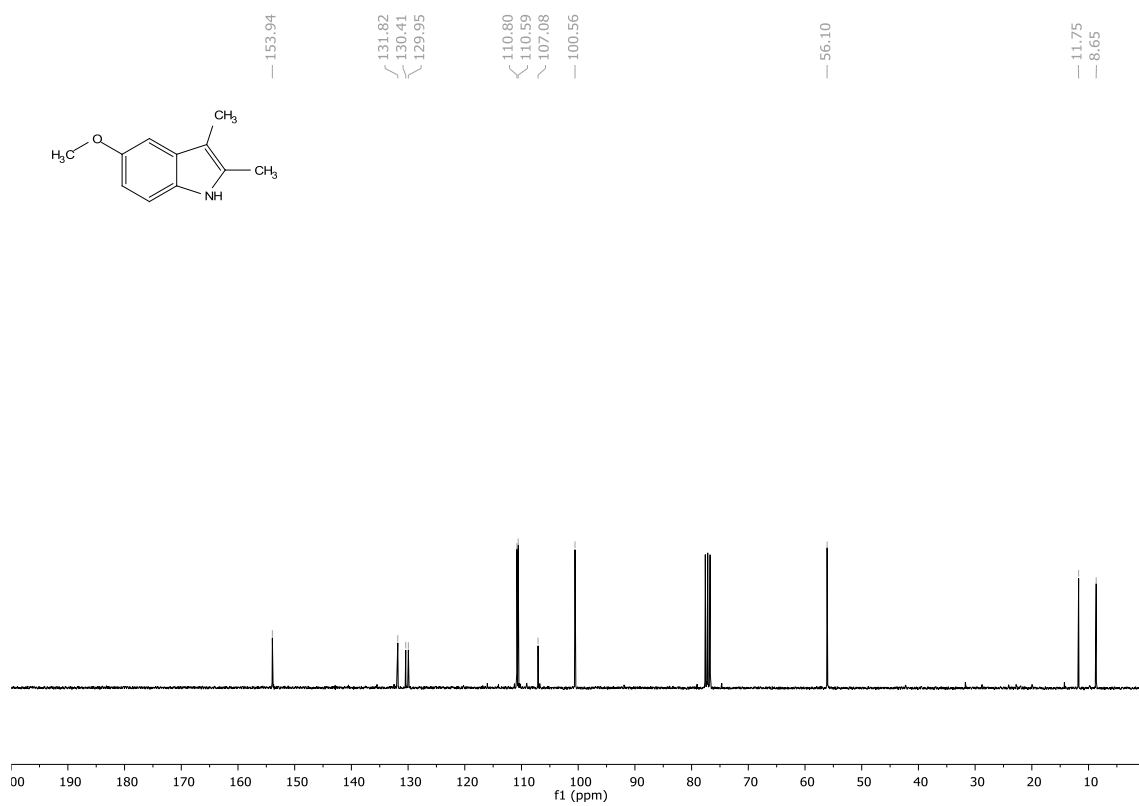

**2,3-dimethyl-1H-benzo[g]indole (3d):**

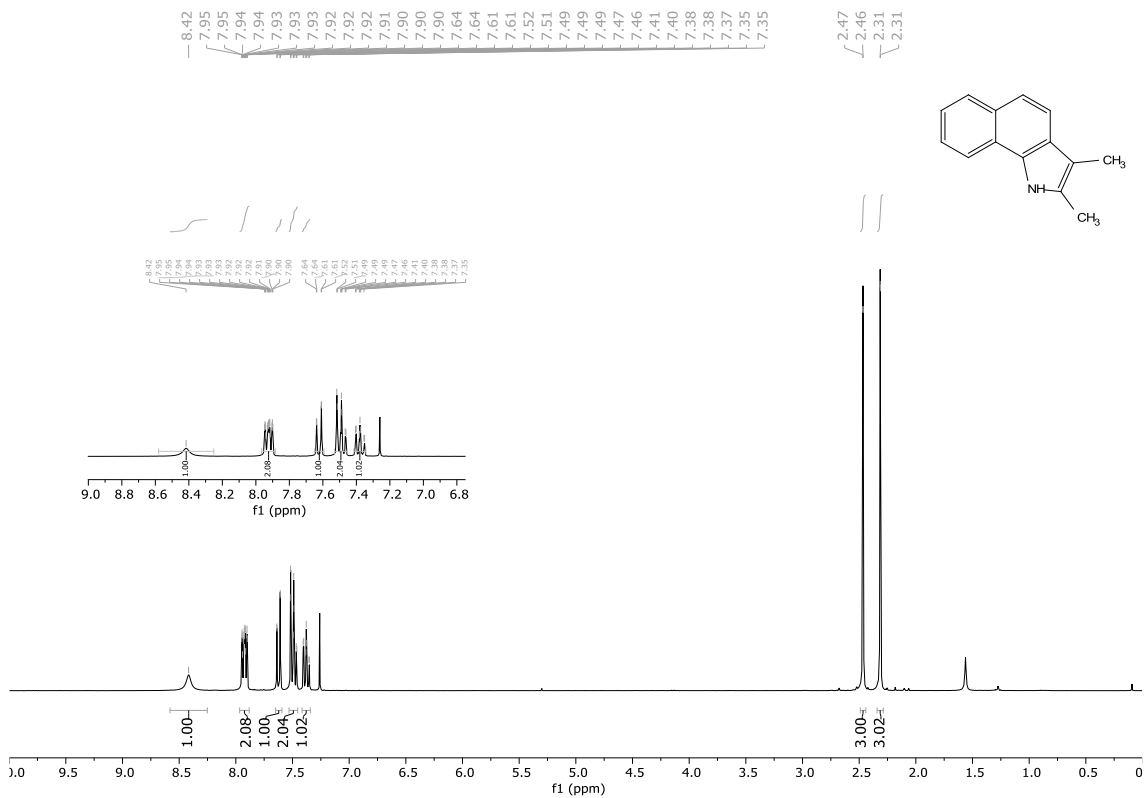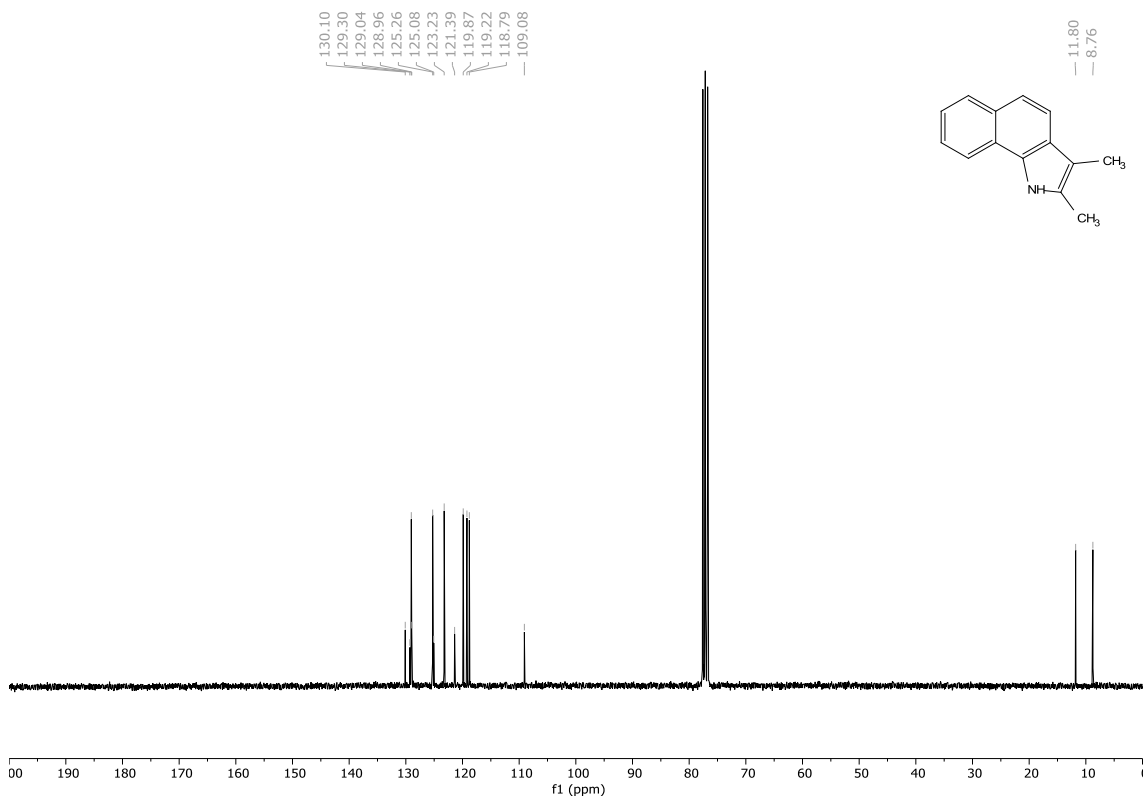

### 2,3-dimethyl-1H-indole (3e):

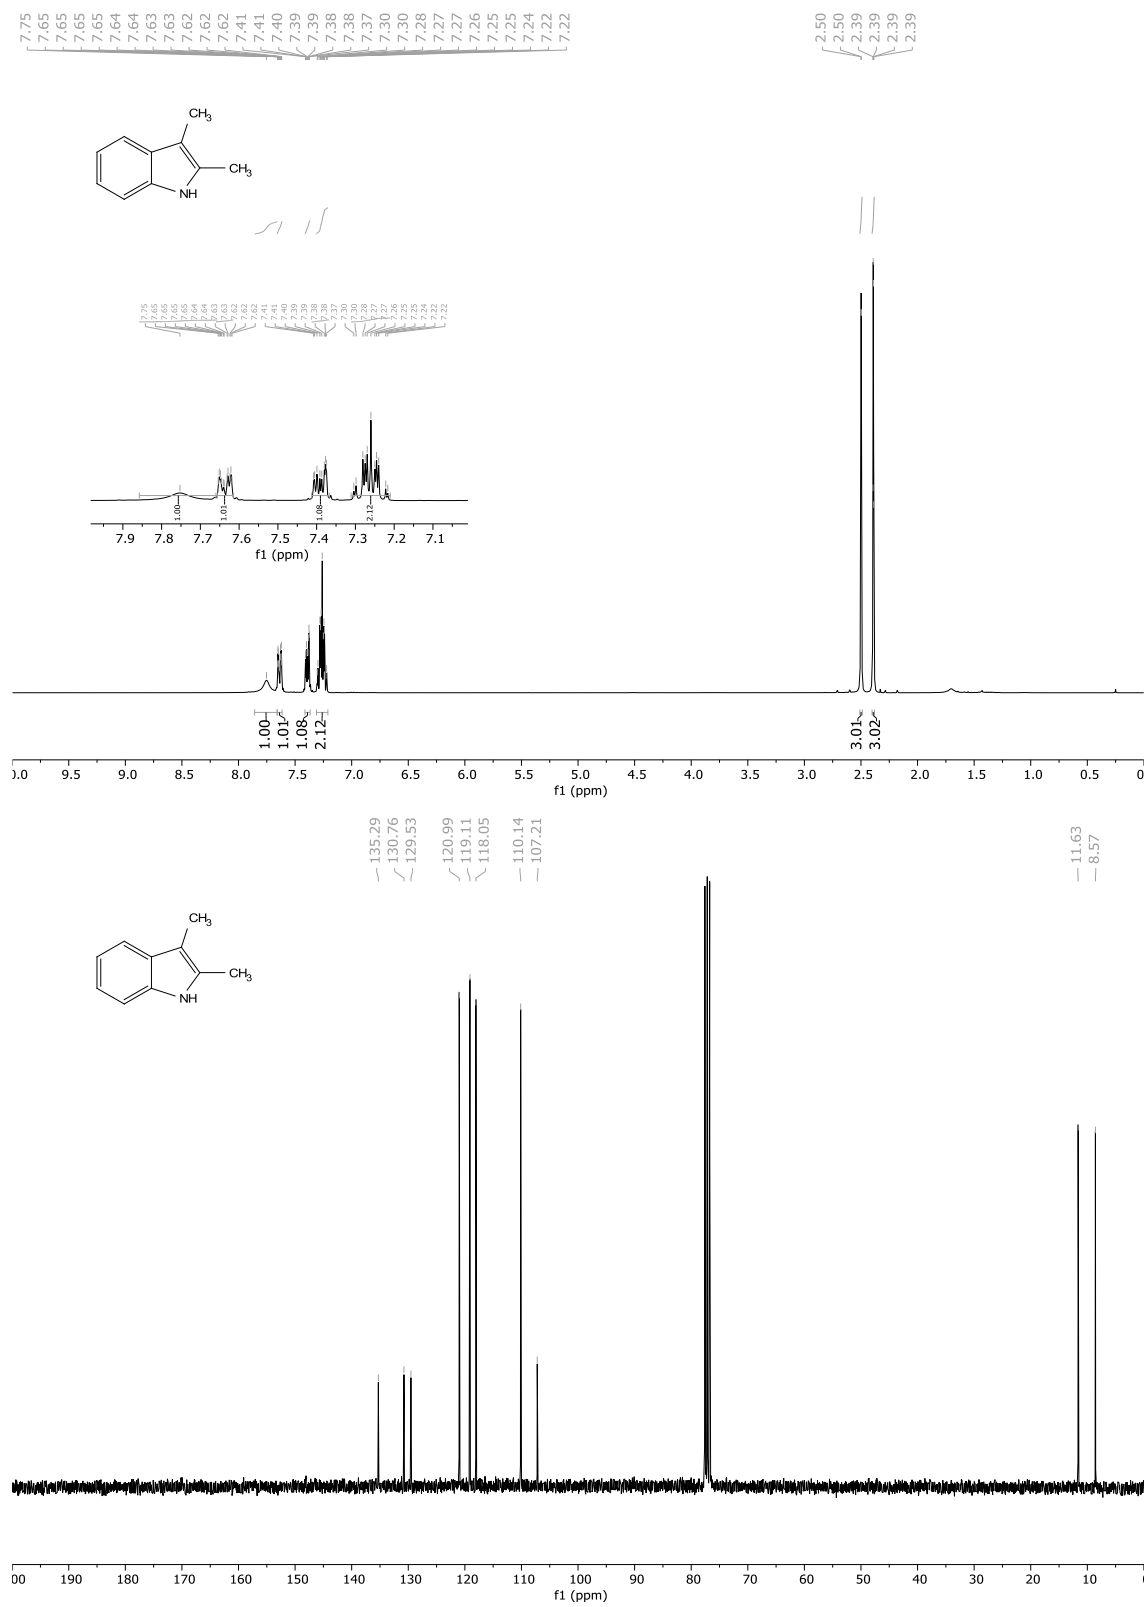

**4,7-dimethoxy-2,3-dimethyl-1H-indole (3f):**

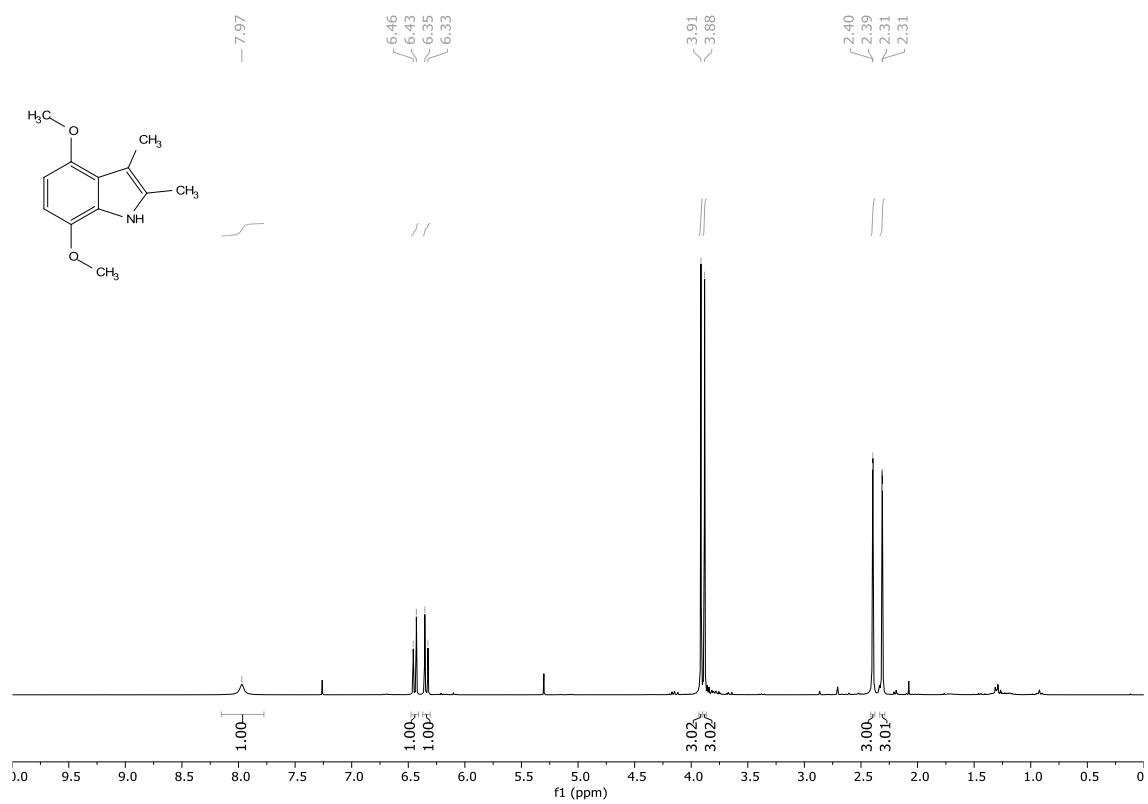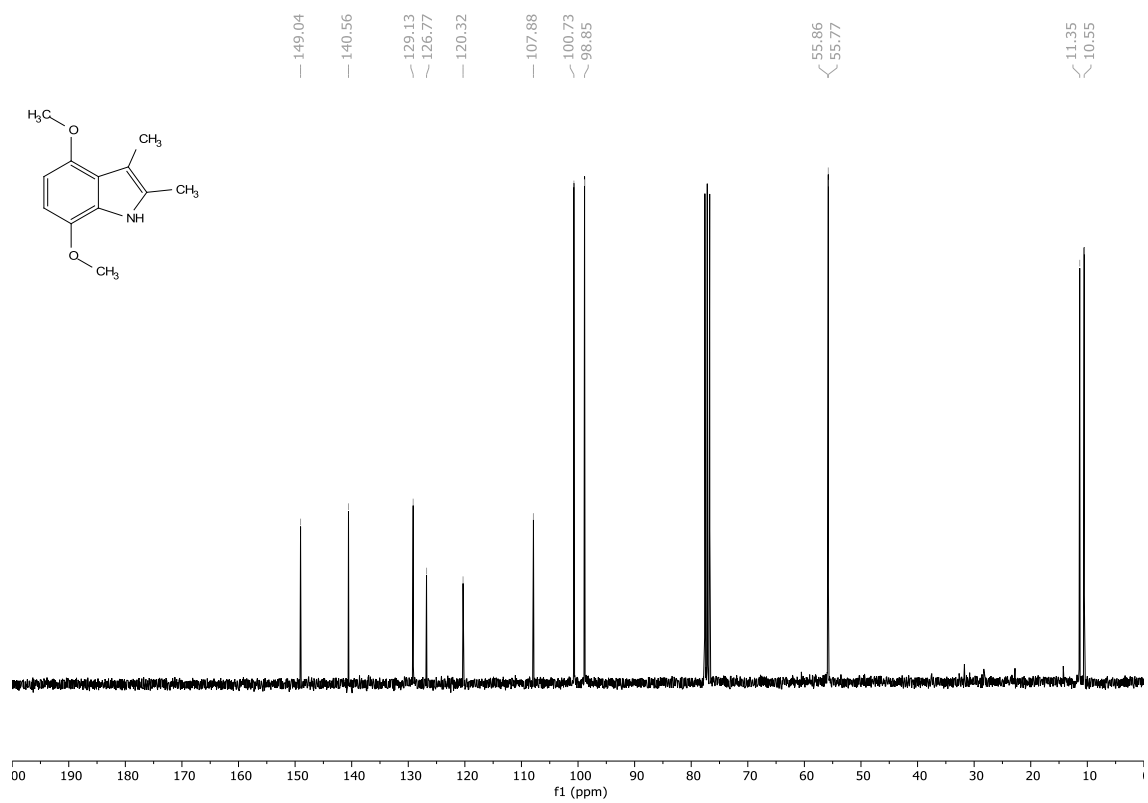



**1,2-dimethyl-5,6-dihydro-4*H*-pyrrolo[3,2,1-*ij*] quinoline (3g):**

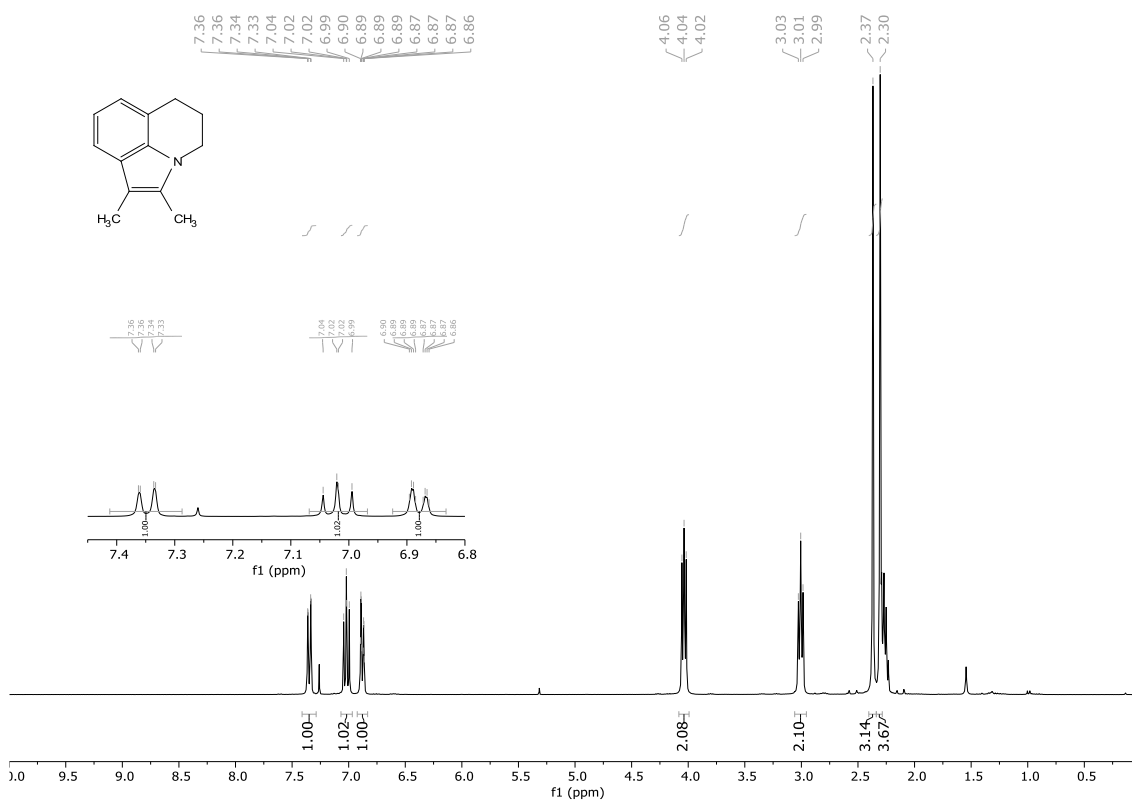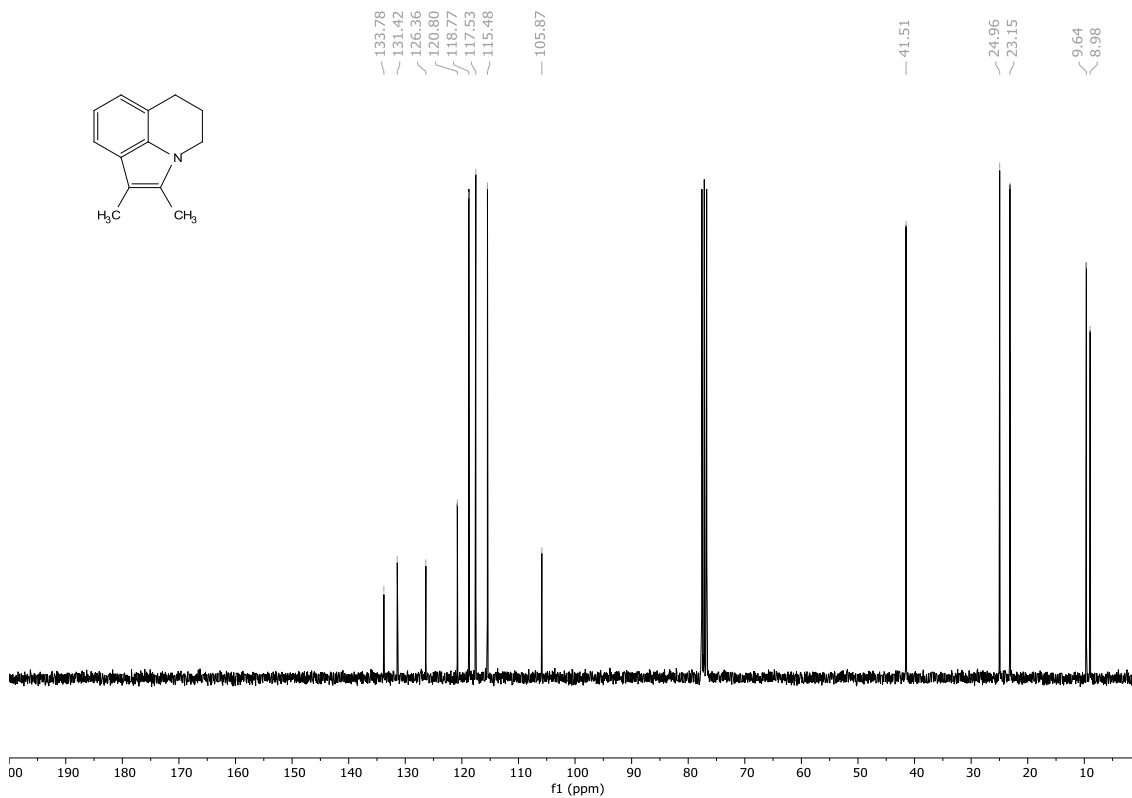

**3-(indolin-1-yl)butan-2-one (2d):**

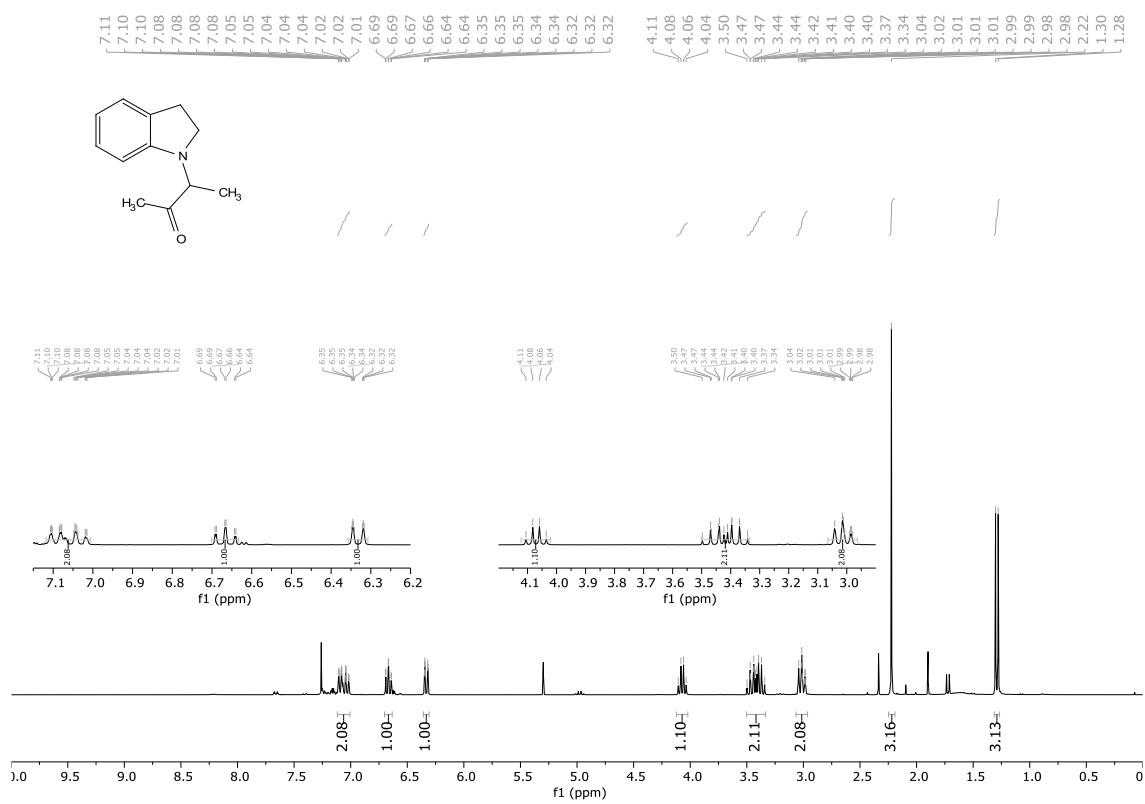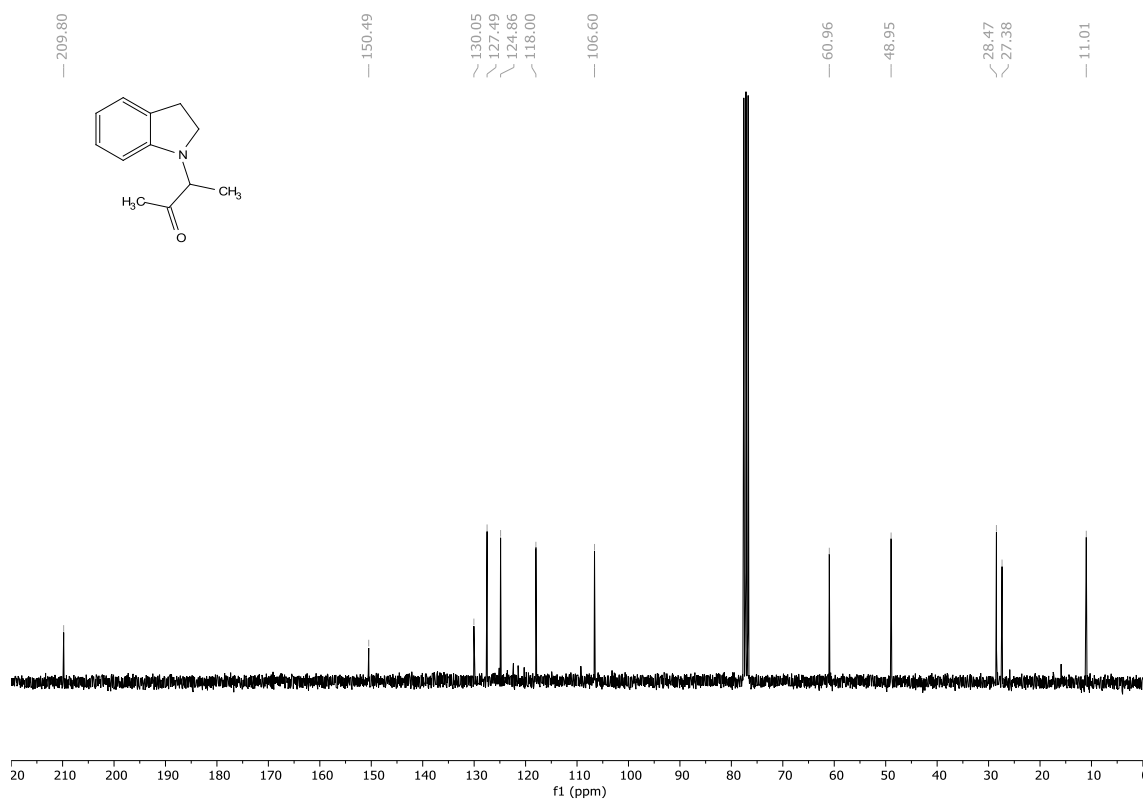

### 2,3-dimethylquinoxaline (4):

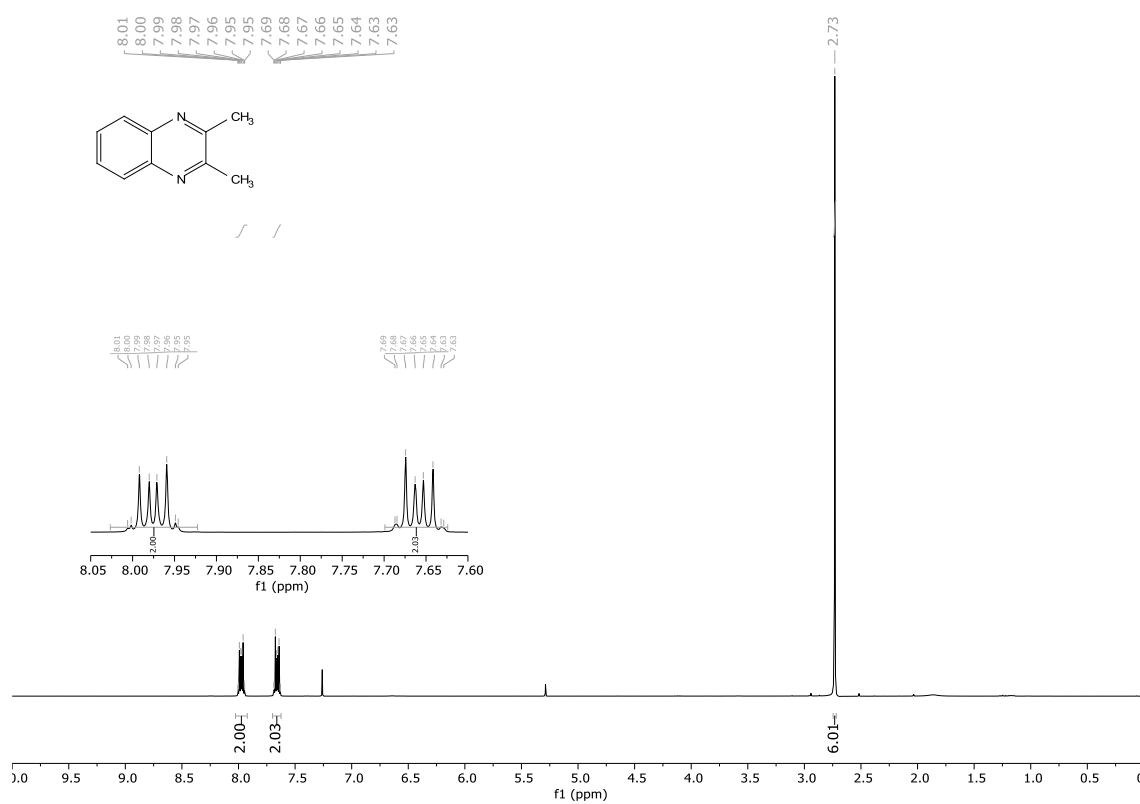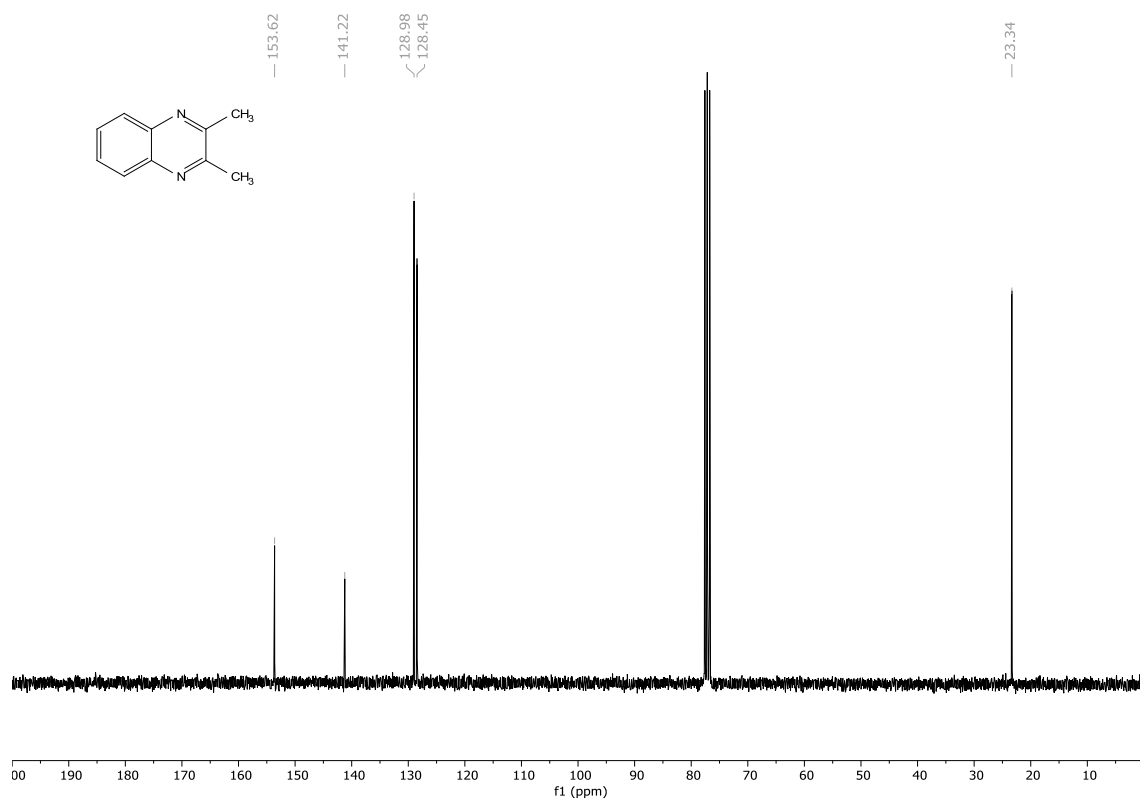

### 5,6,7-trimethoxy-1H-indole (5)

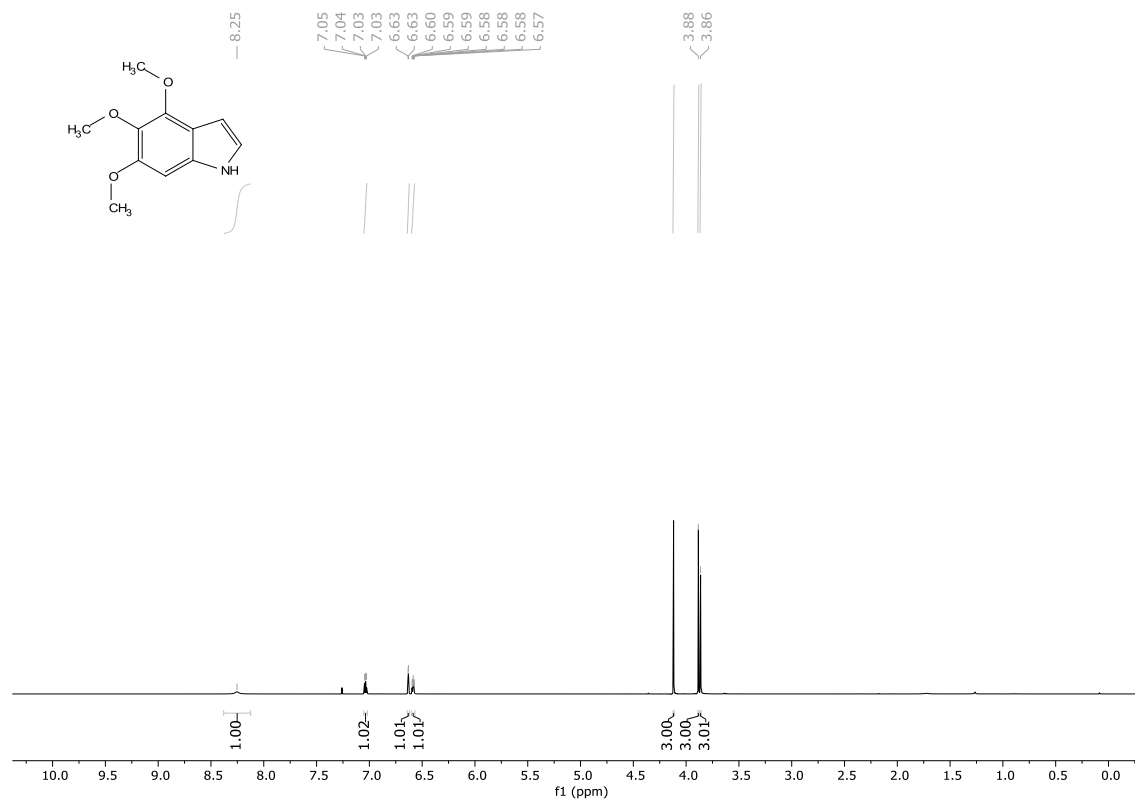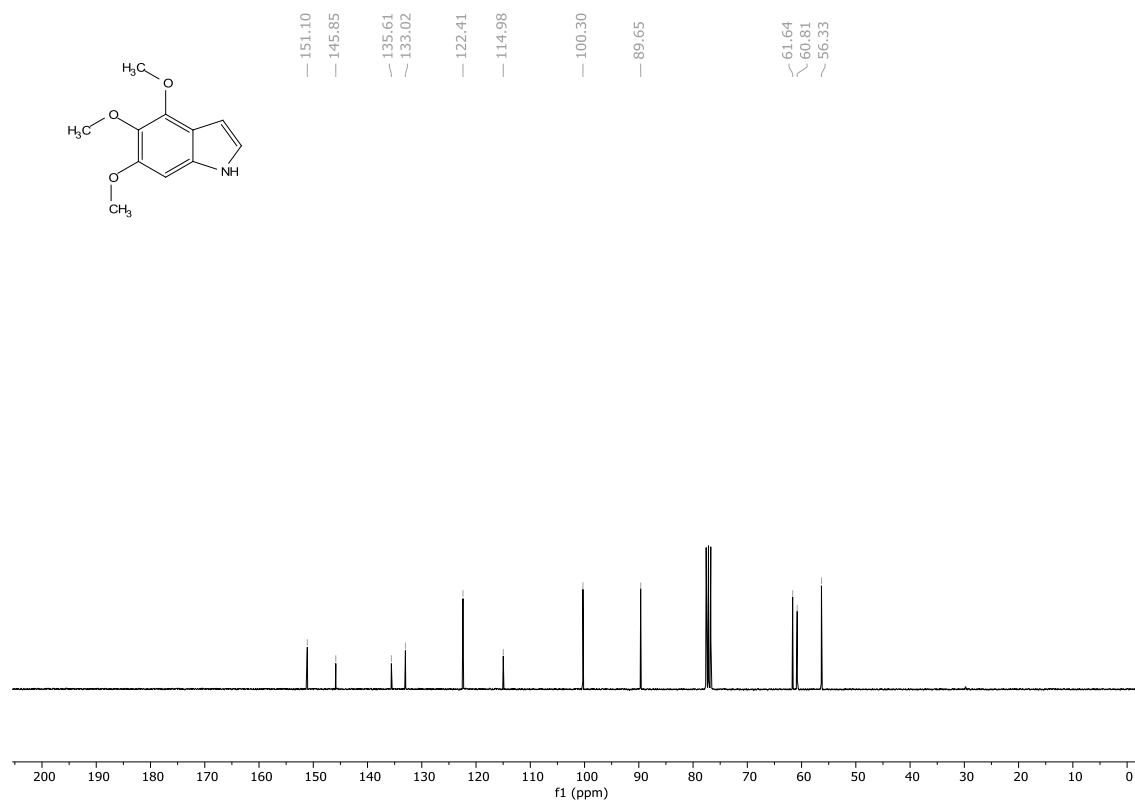

**5,6,7-trimethoxy-2,3,4,9-tetrahydro-1H-carbazole (7a)**

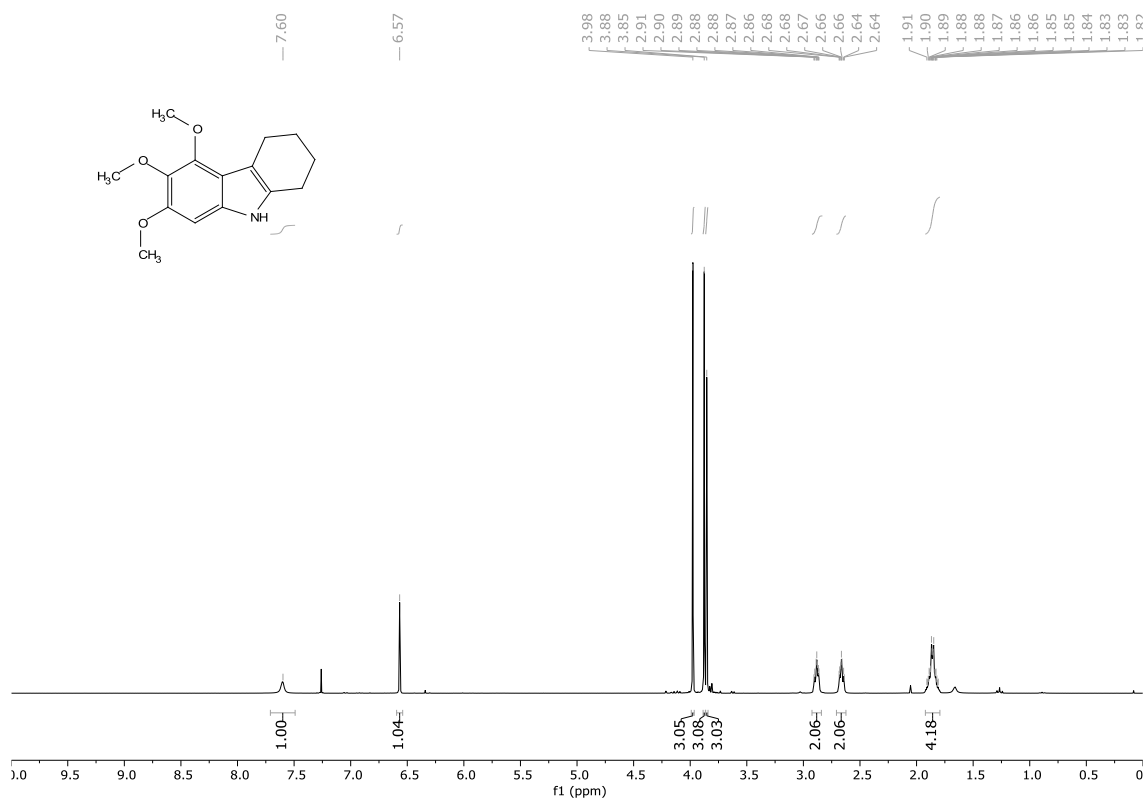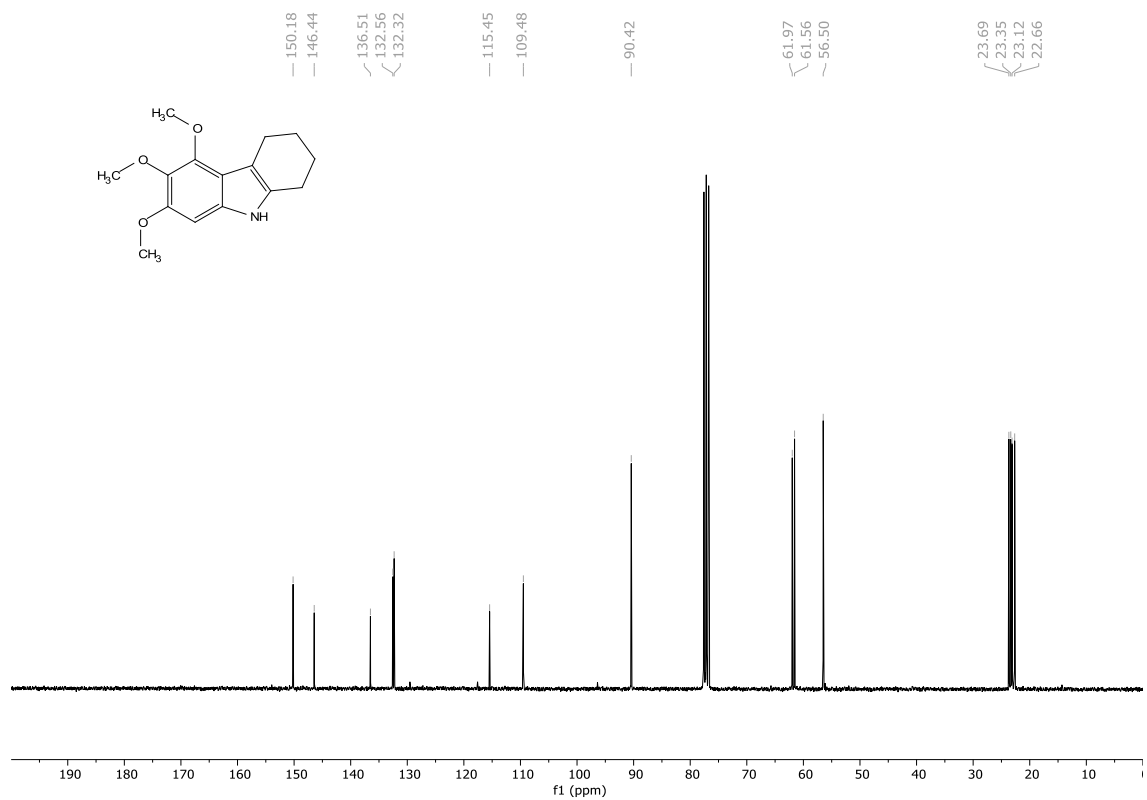

### 5,7-dimethyl-2,3,4,9-tetrahydro-1H-carbazole (7b):

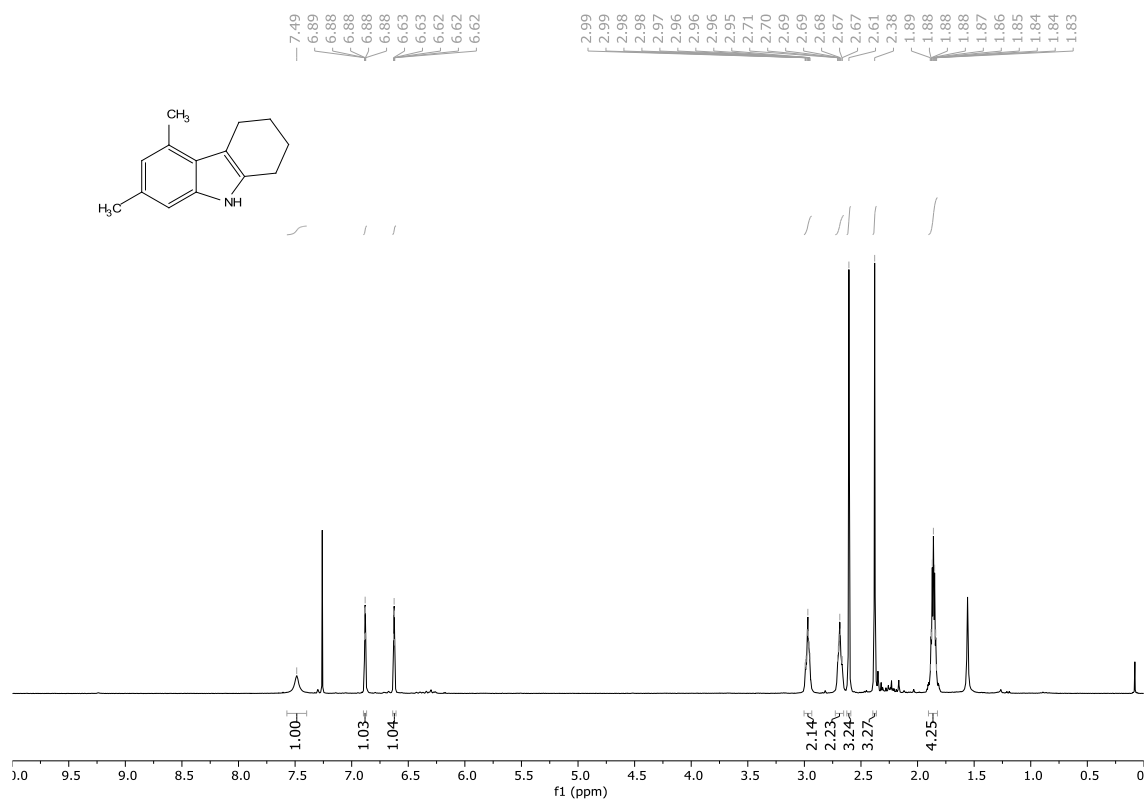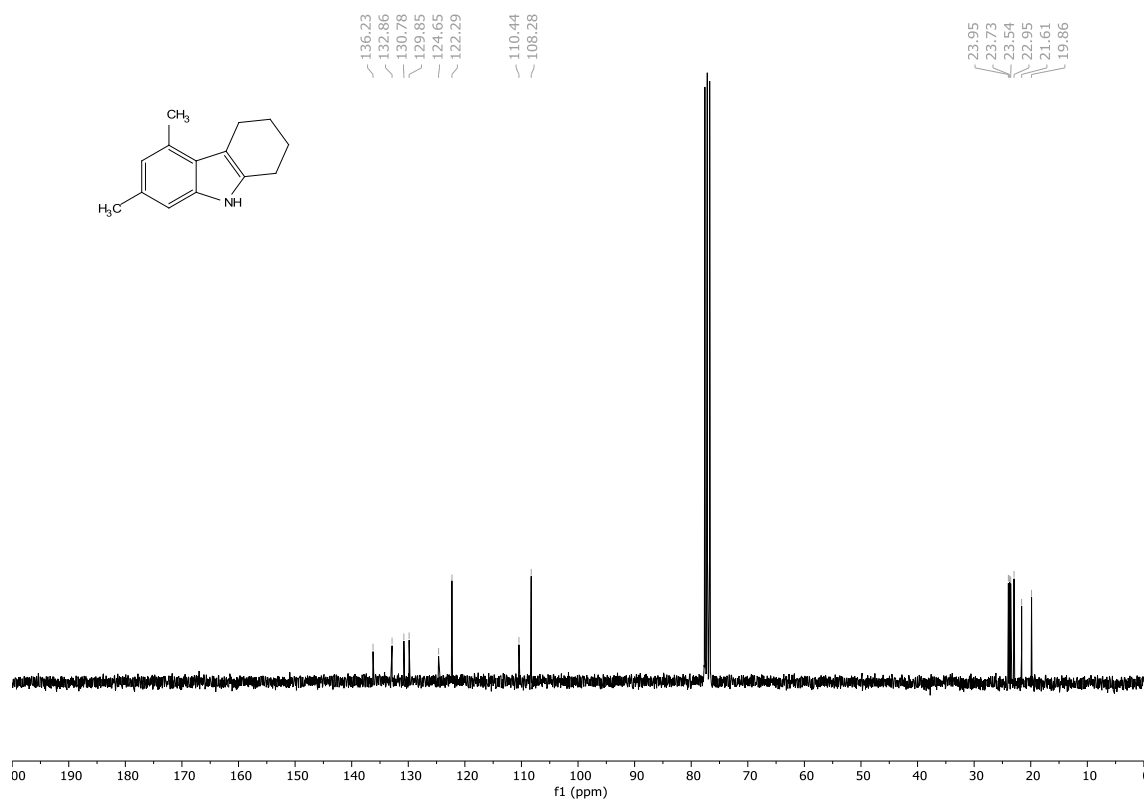

### 6-methoxy-2,3,4,9-tetrahydro-1H-carbazole (7c):

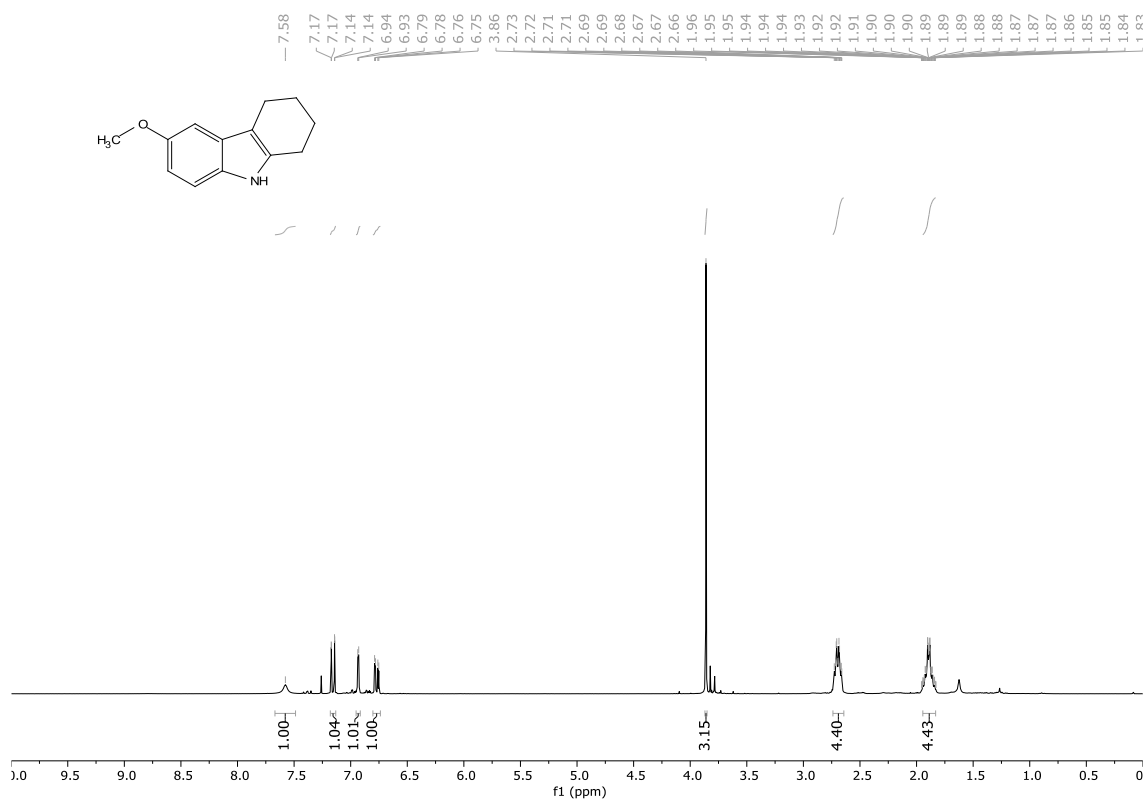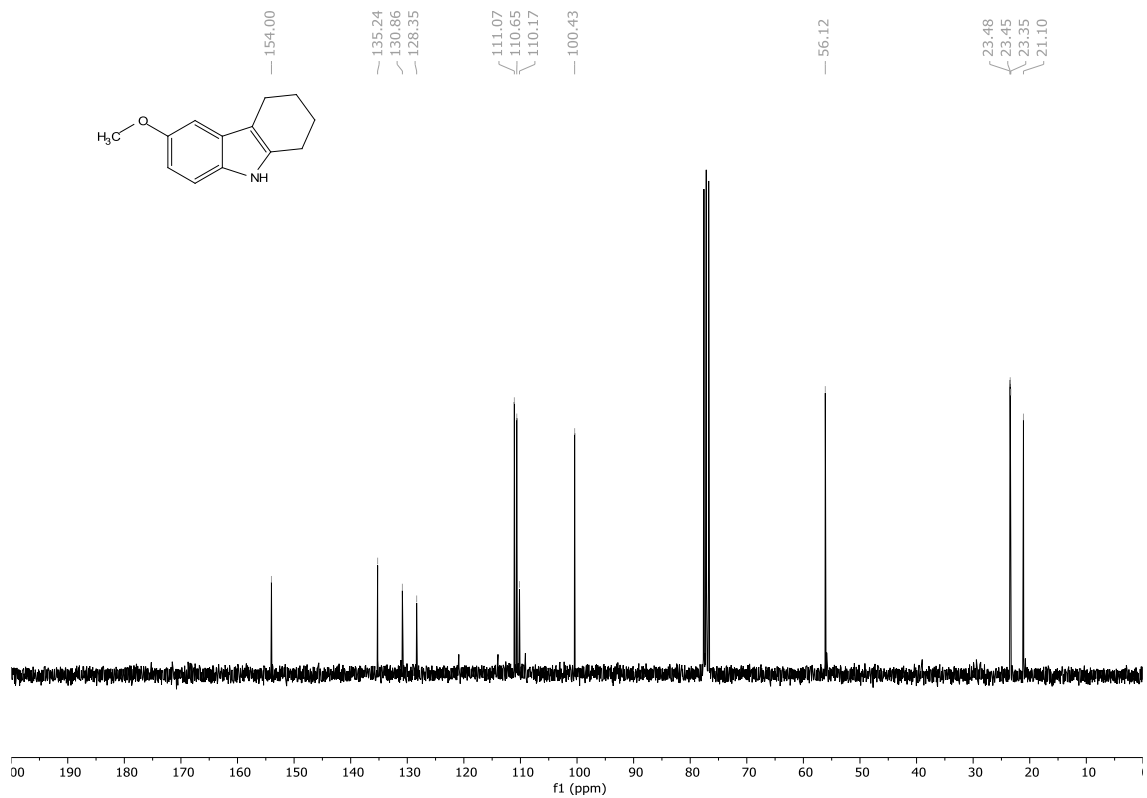

### 8,9,10,11-tetrahydro-7H-benzo[a]carbazole (7d):

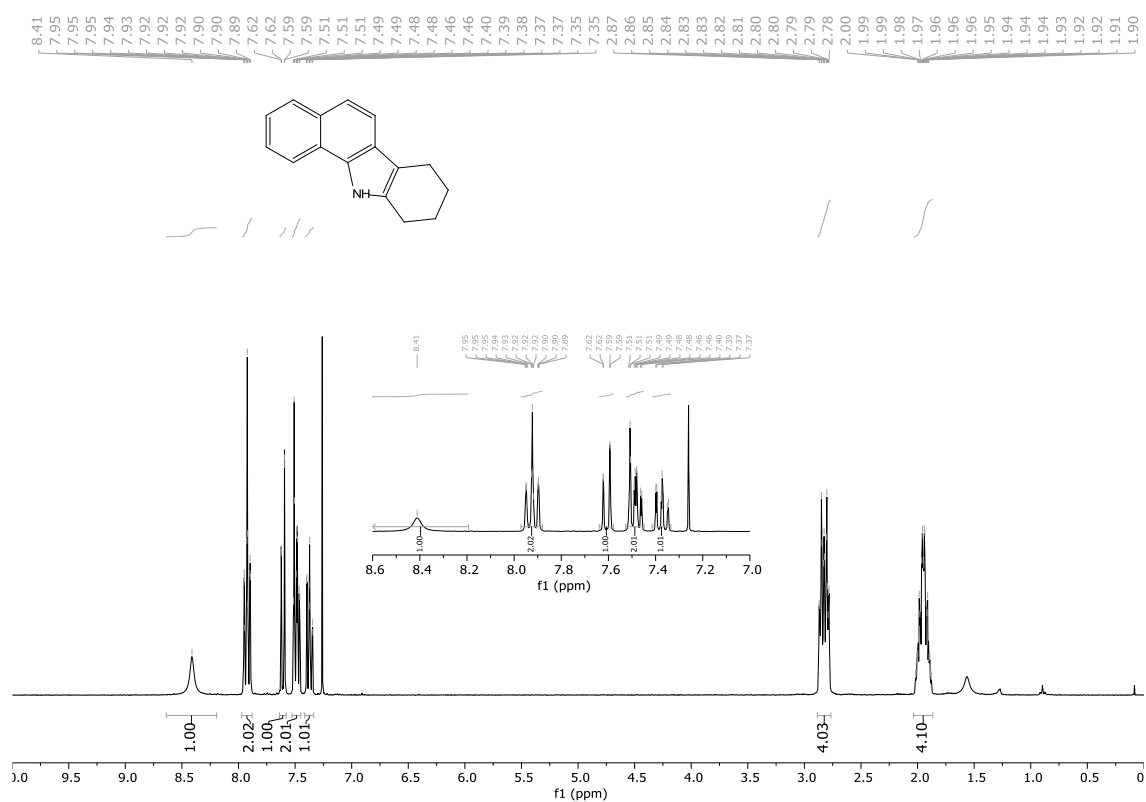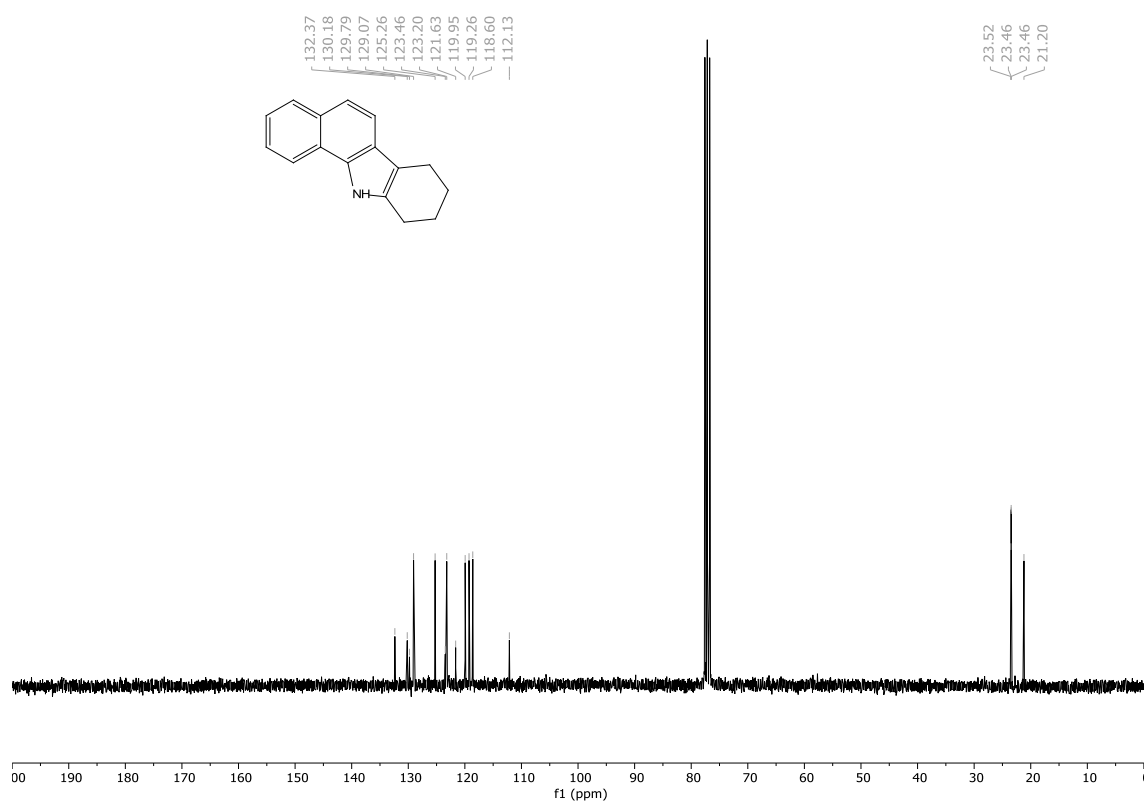



### 6,7,8,9-tetrahydro-1H-carbazole (7e):

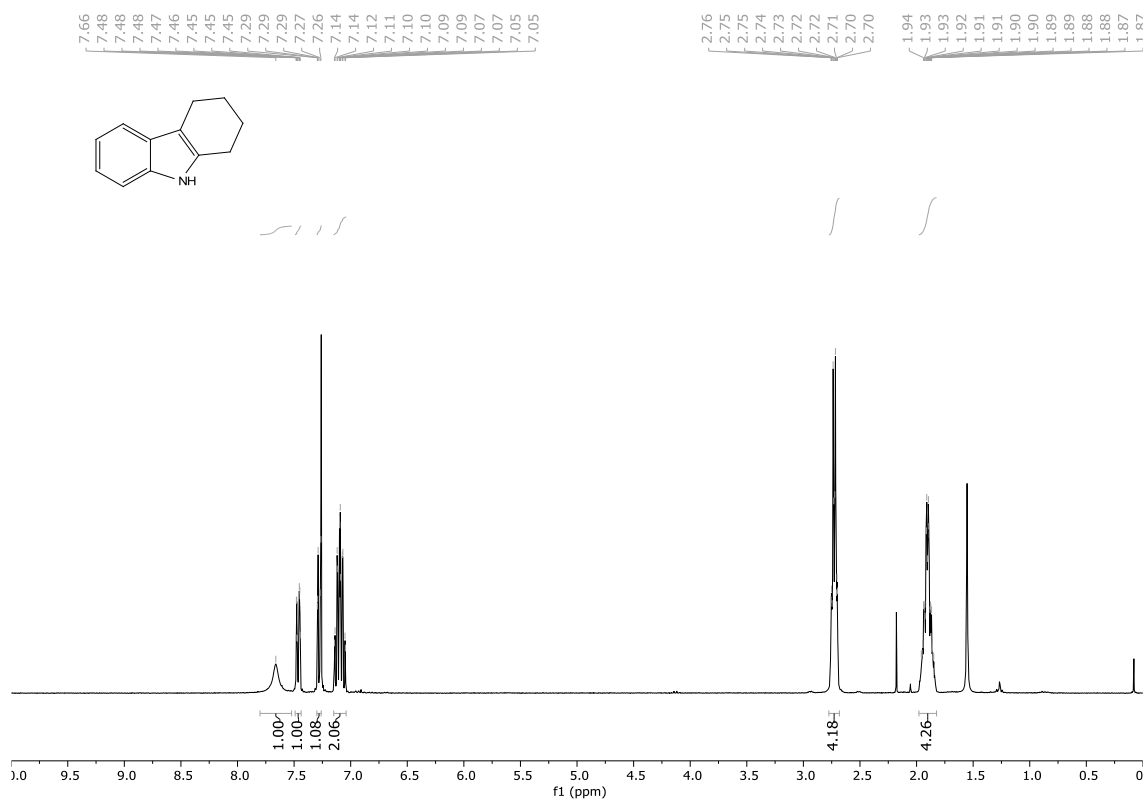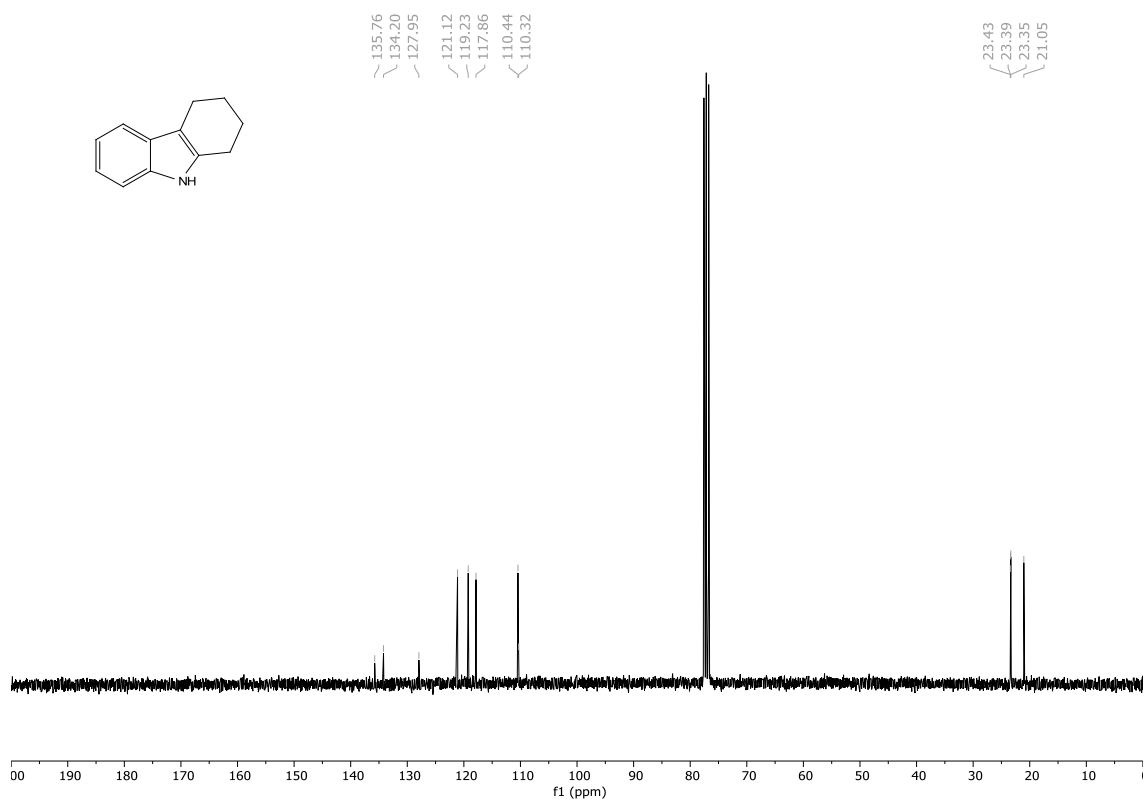

**5,8-dimethoxy-2,3,4,9-tetrahydro-1H-carbazole (7f):**

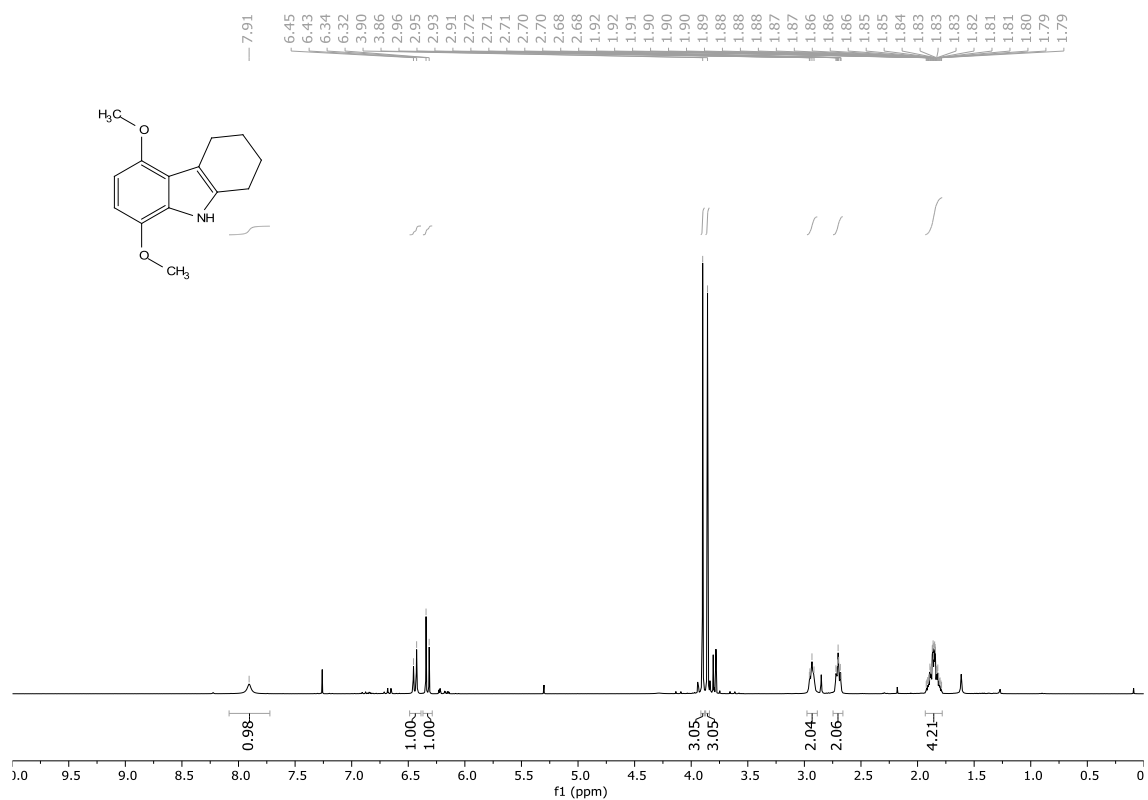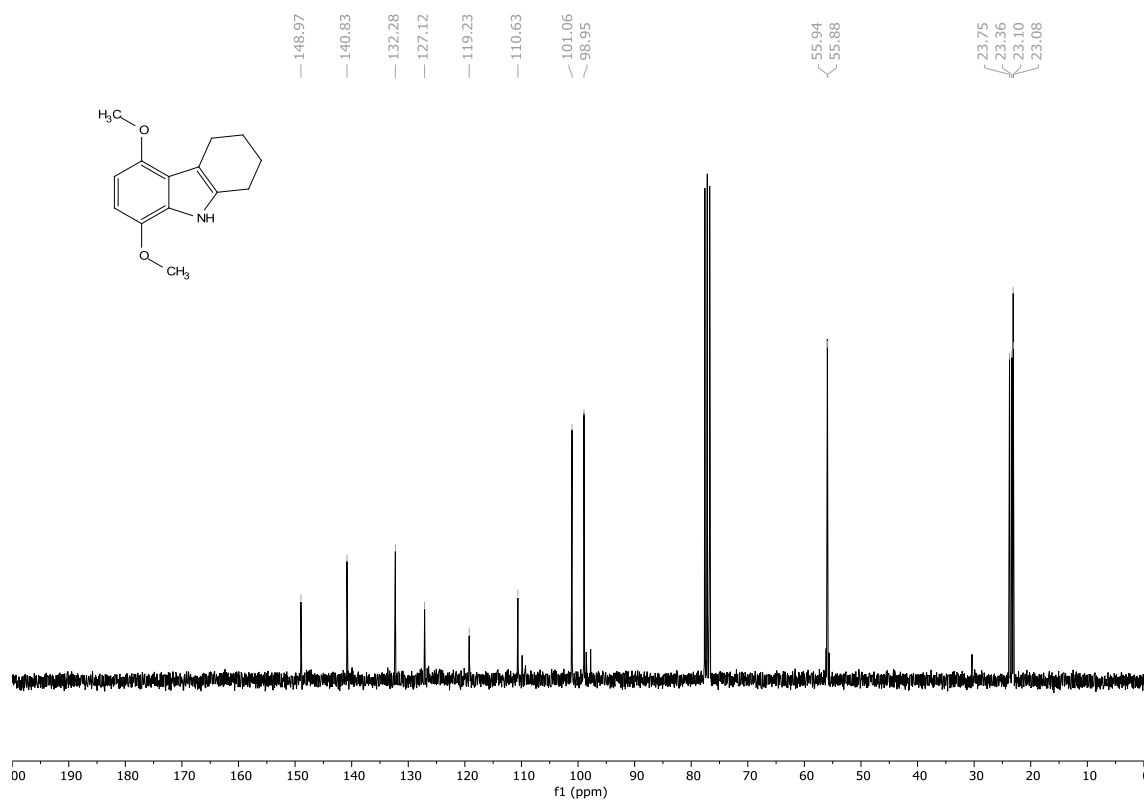

**5,6,8,9,10,11-hexahydro-4H-pyrido[3,2,1-jk]carbazole (7g):**

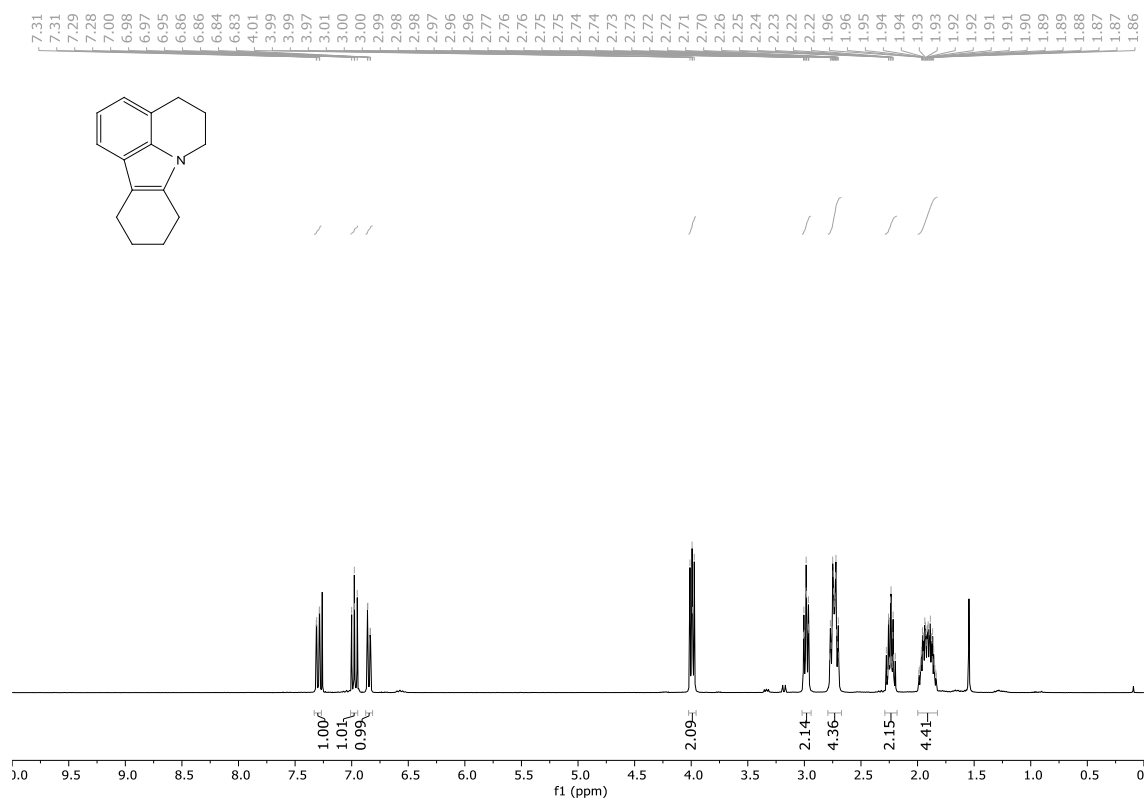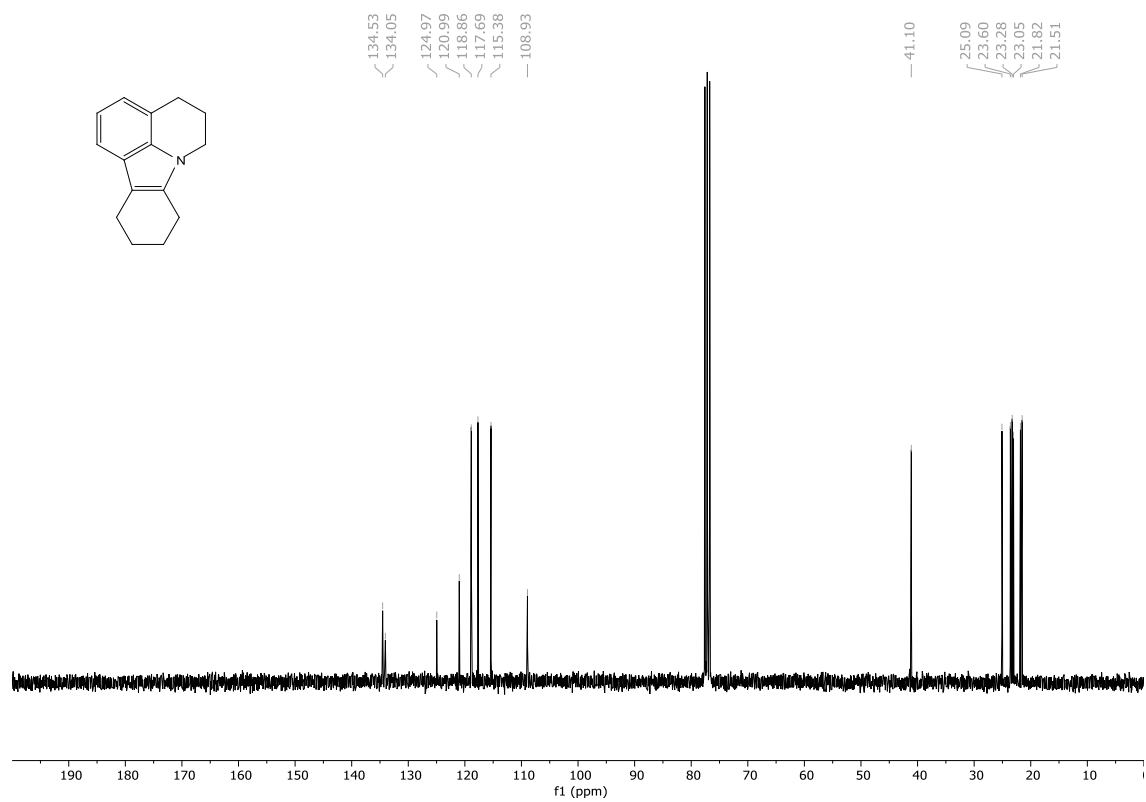

**1,2,3,4-tetrahydrophenazine (8):**

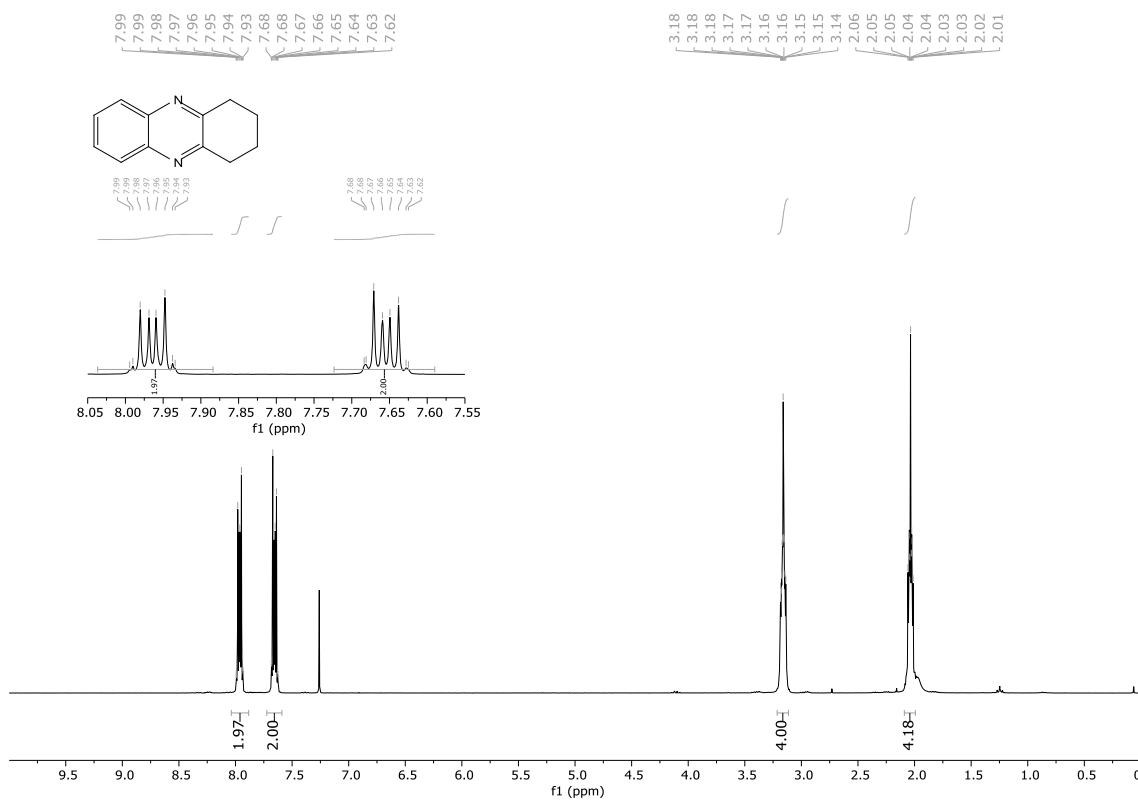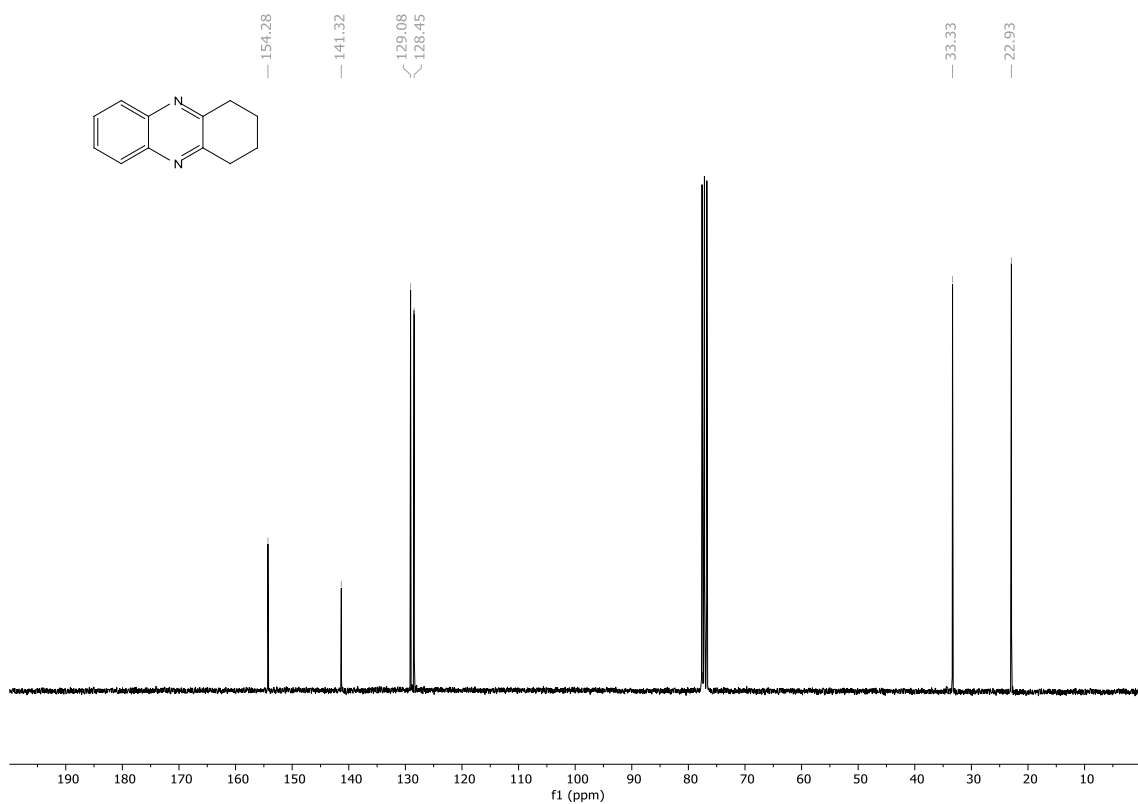

### 4,5,6-trimethoxy-3-methyl-1H-indole (9a)

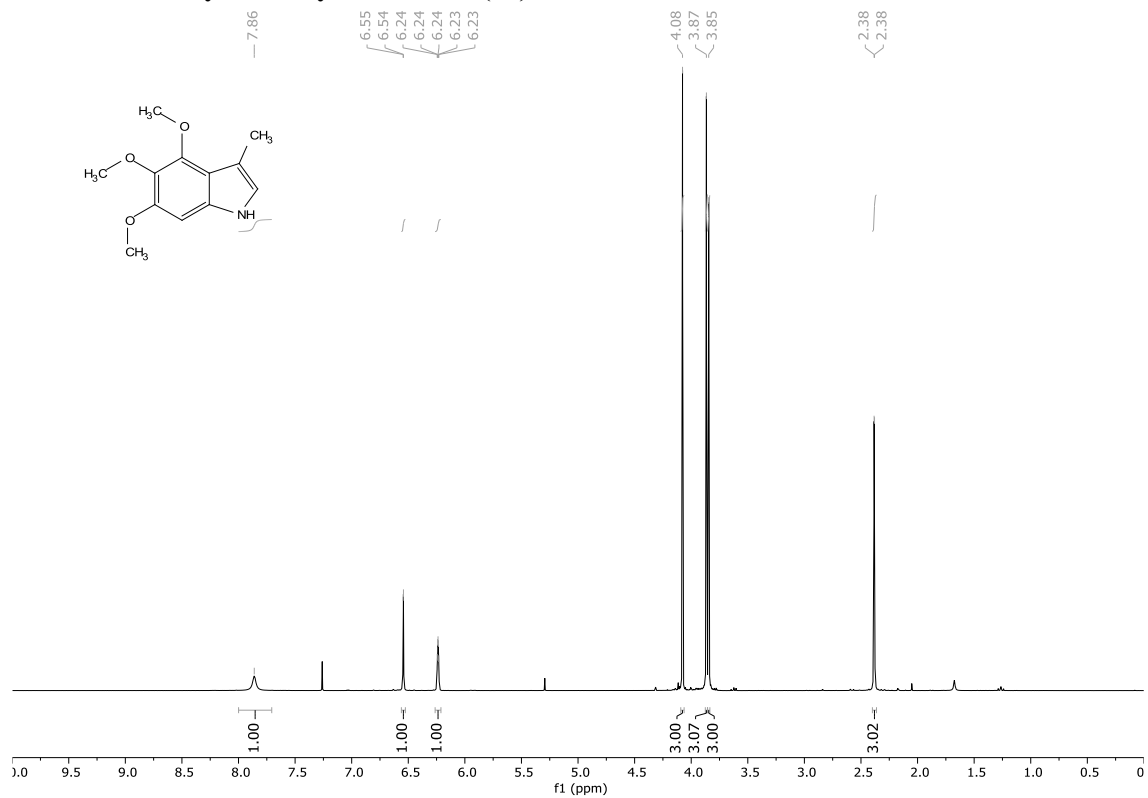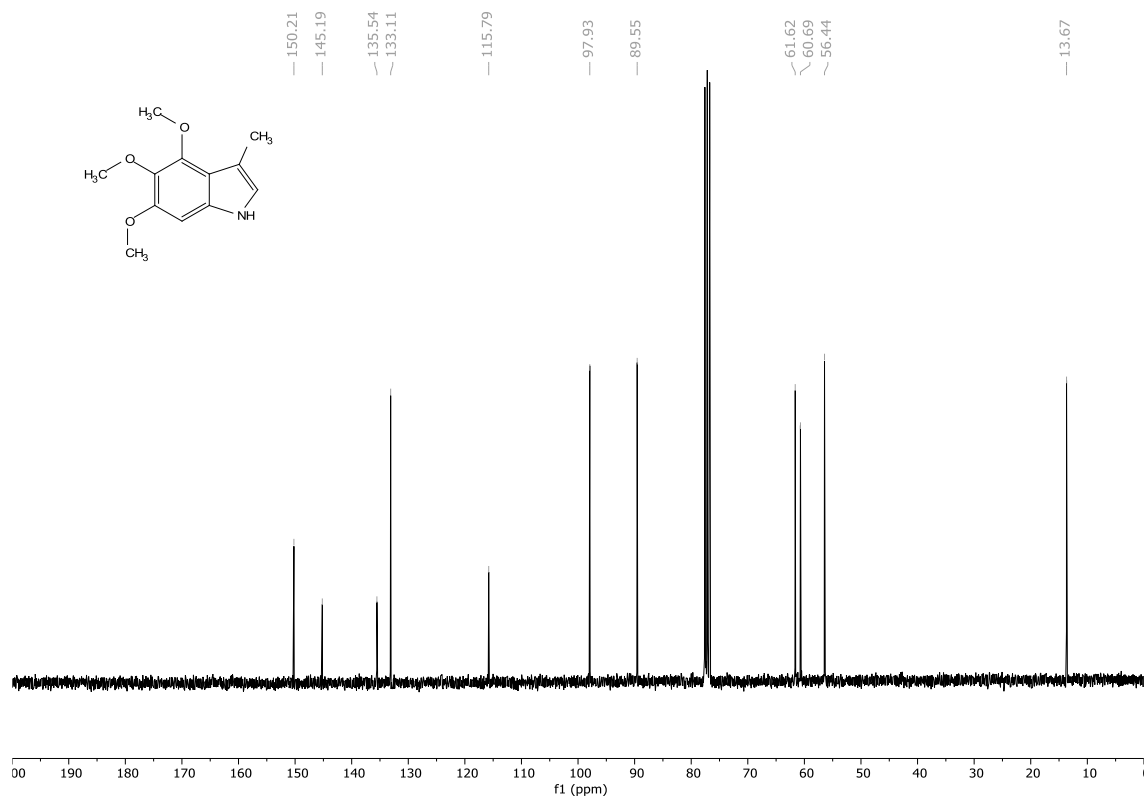

### 4,5,6-trimethoxy-2-methyl-1H-indole (9b)

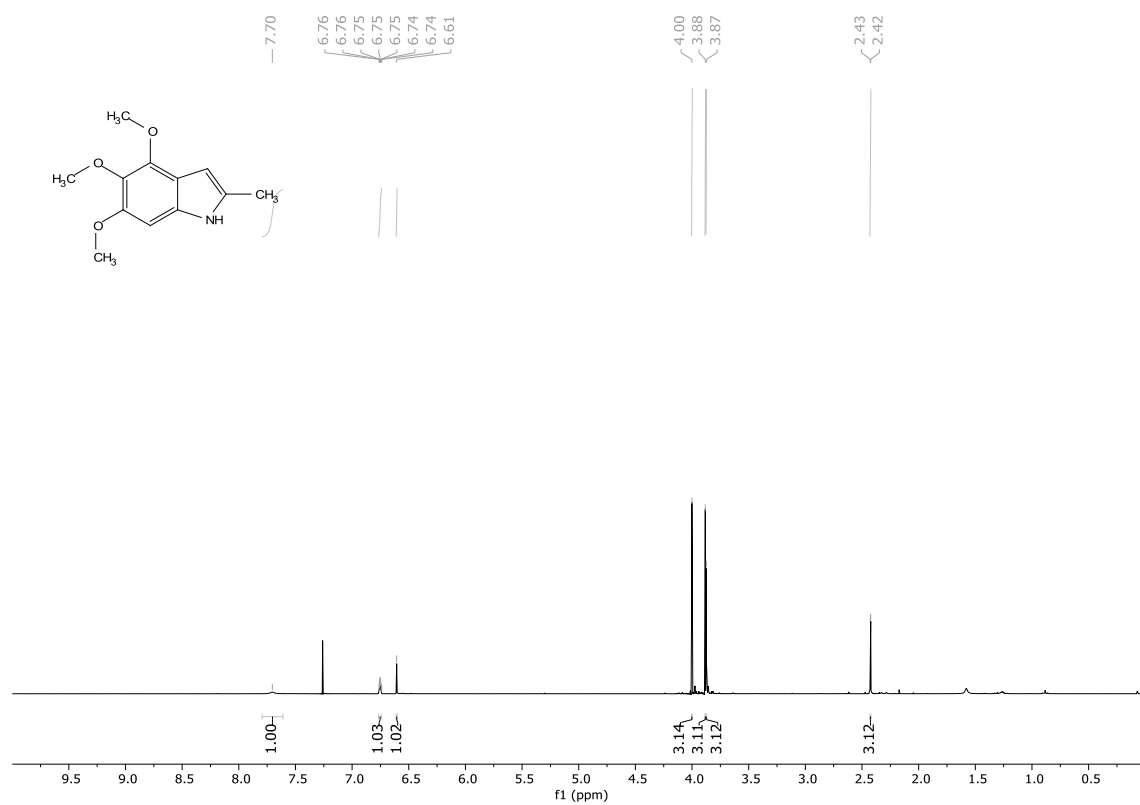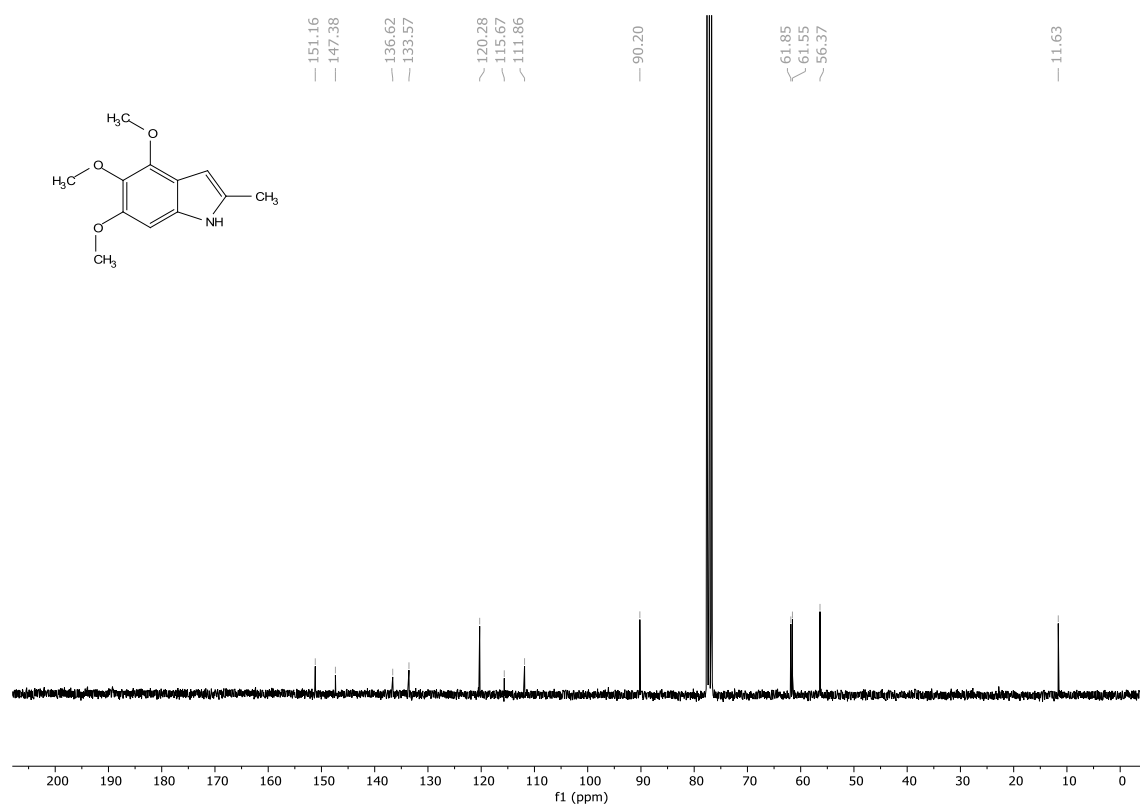

**5,6,7-trimethoxyquinoline (10a):**

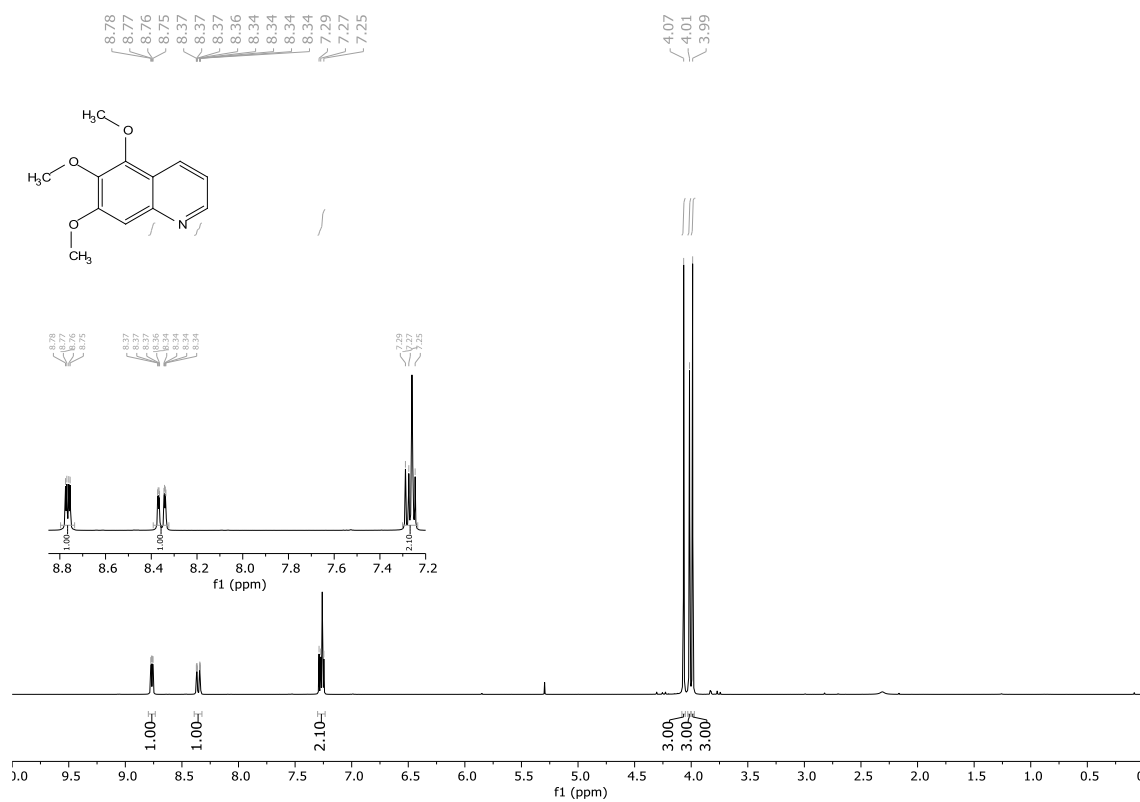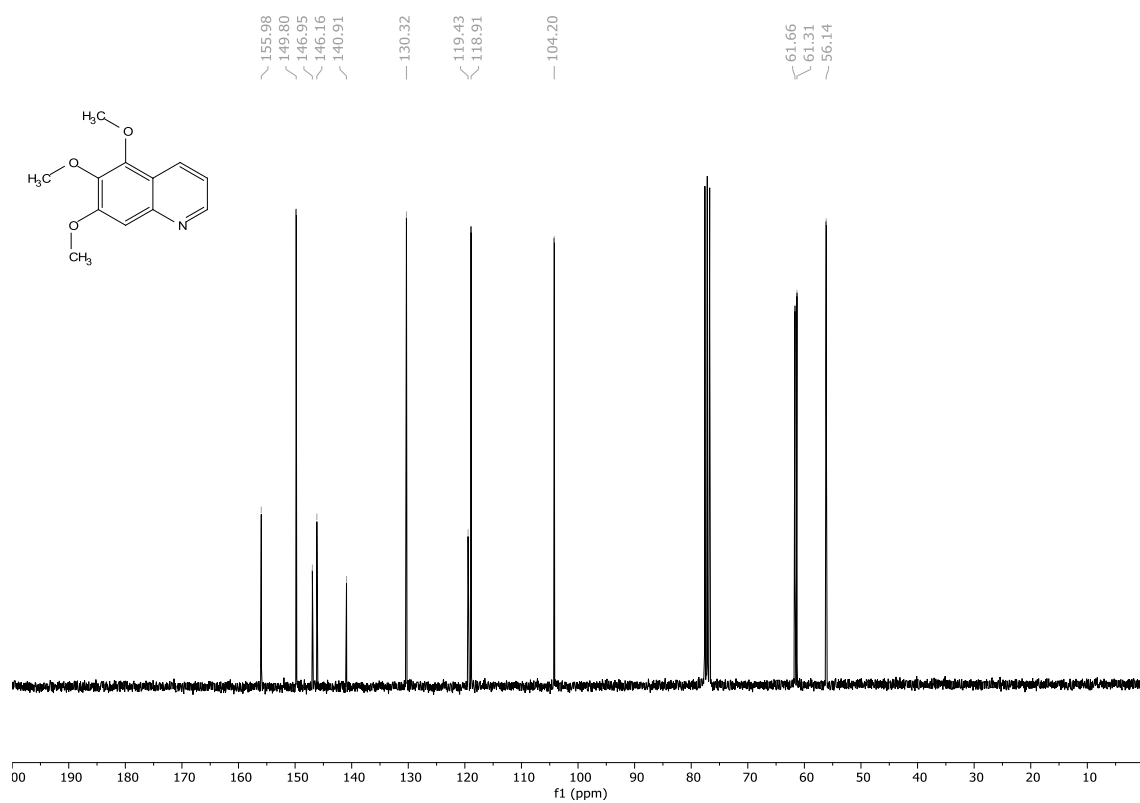

**5,6,7-trimethoxy-1,2,3,4-tetrahydroquinoline (10b):**

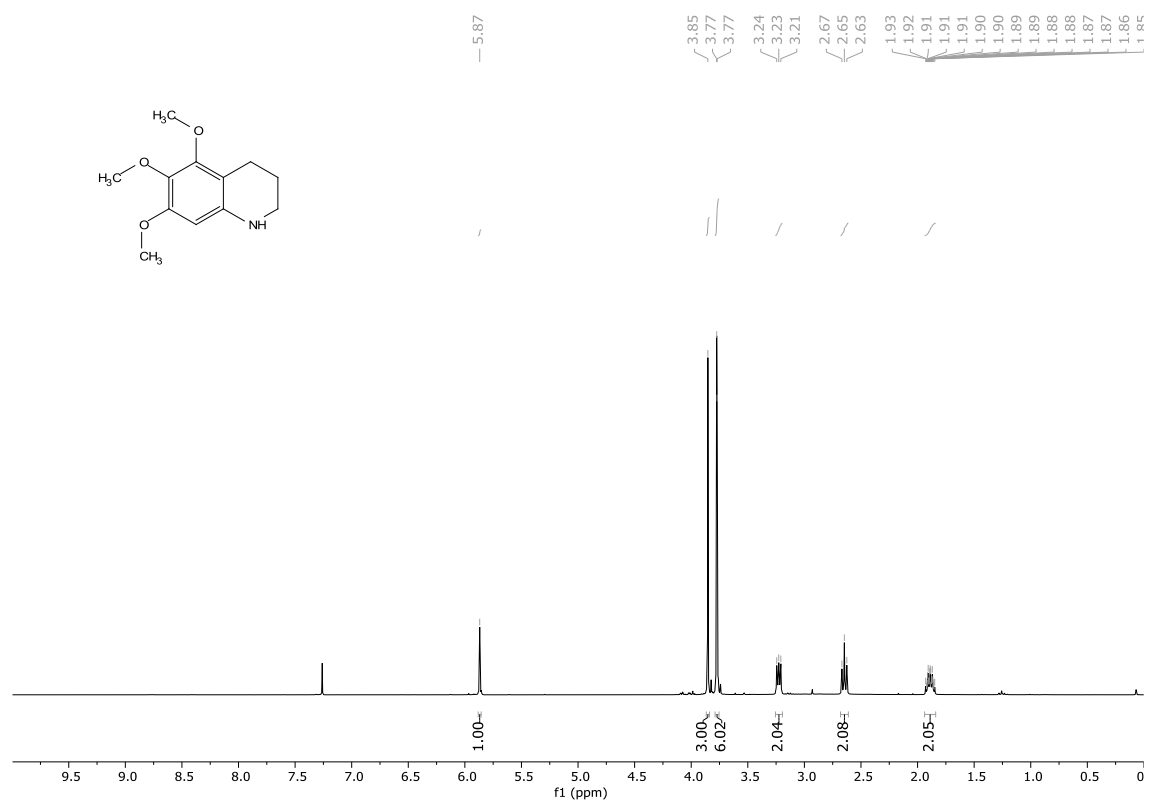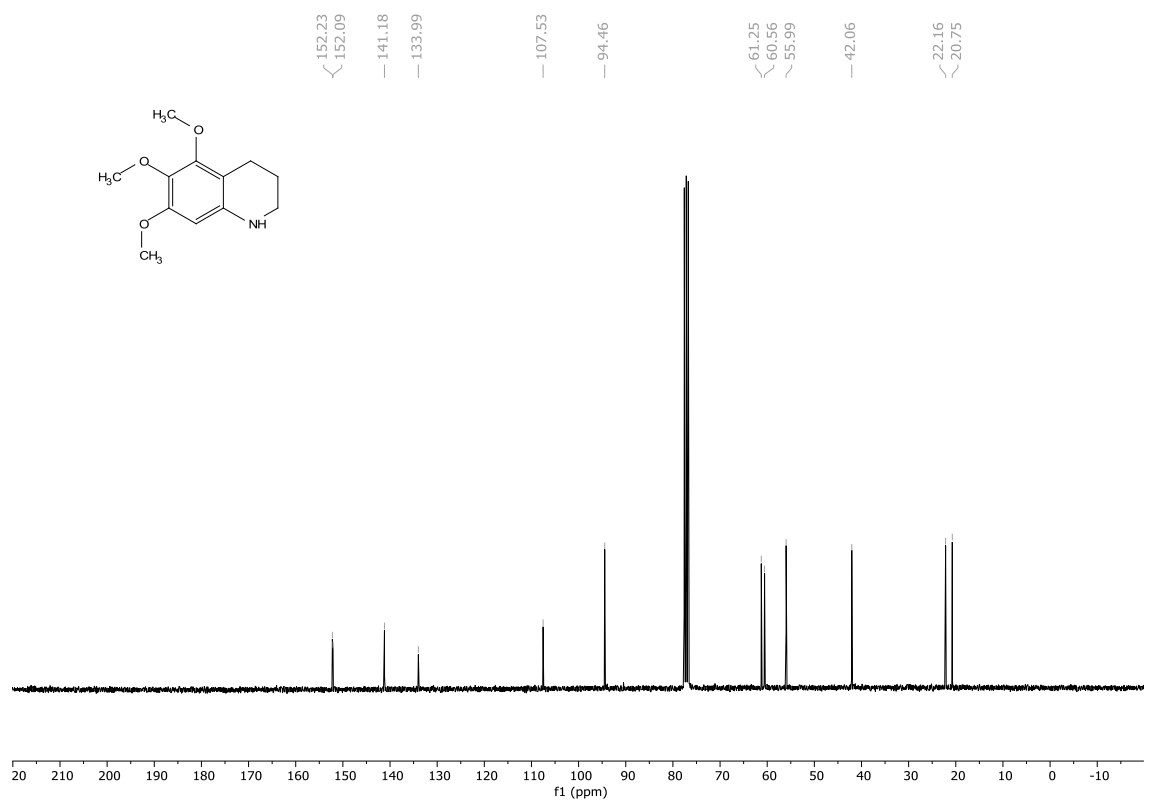



### 3,4,5-trimethoxyjulolidine (10c):

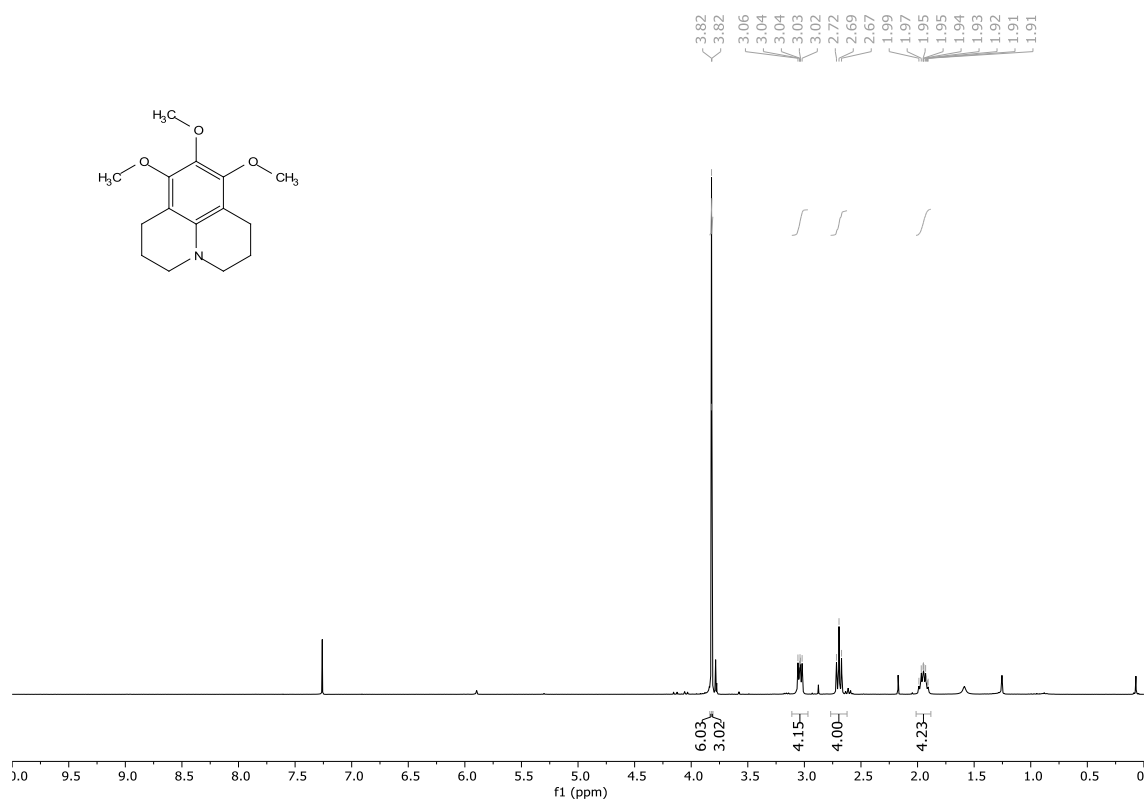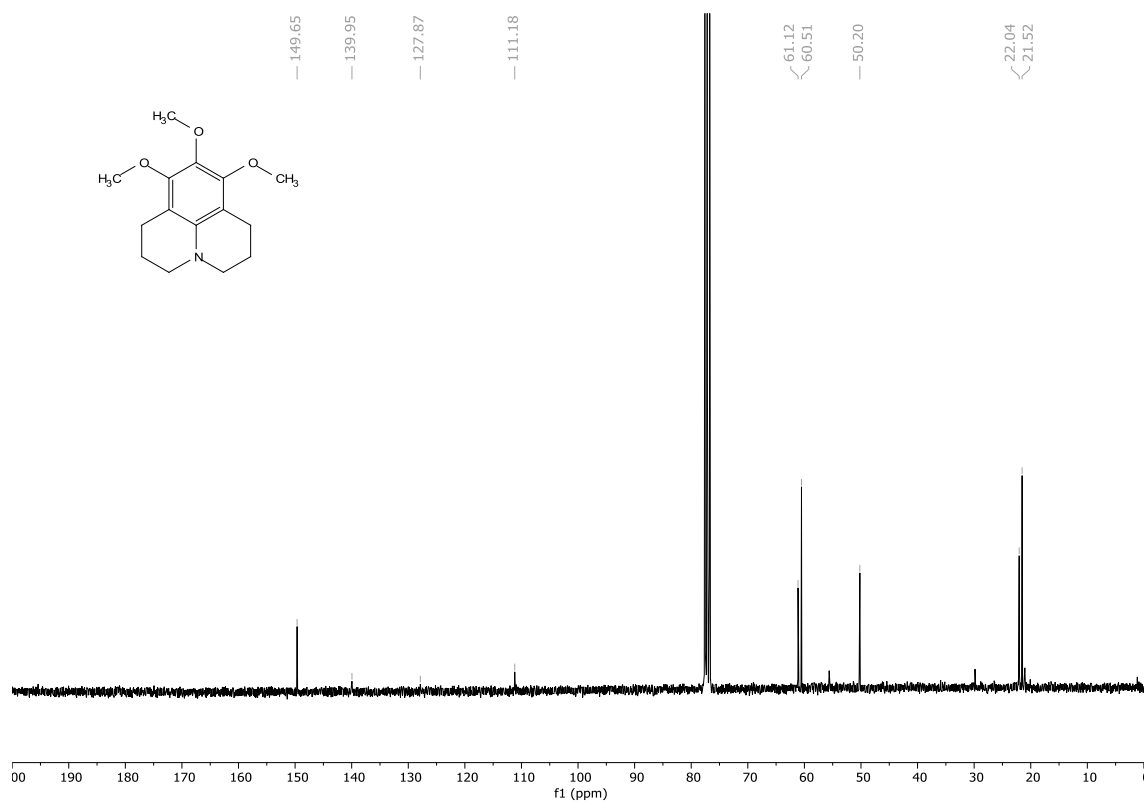

### 5,7-dimethylquinoline (11a):

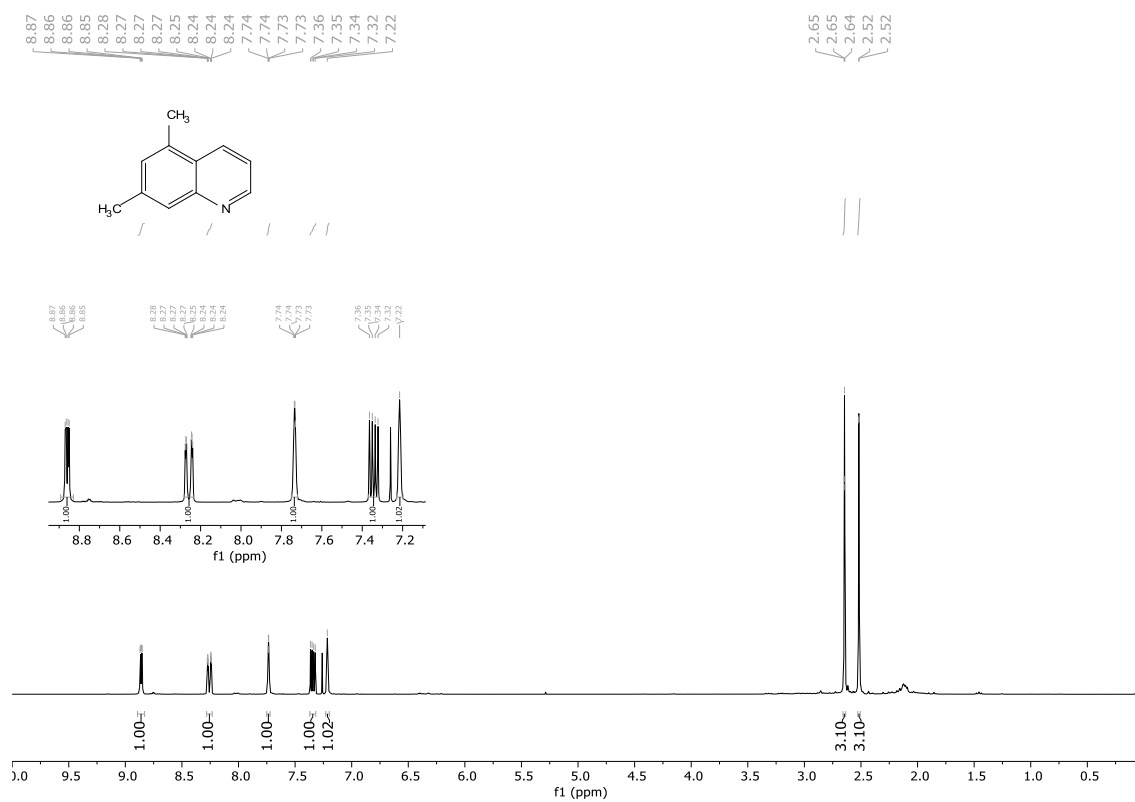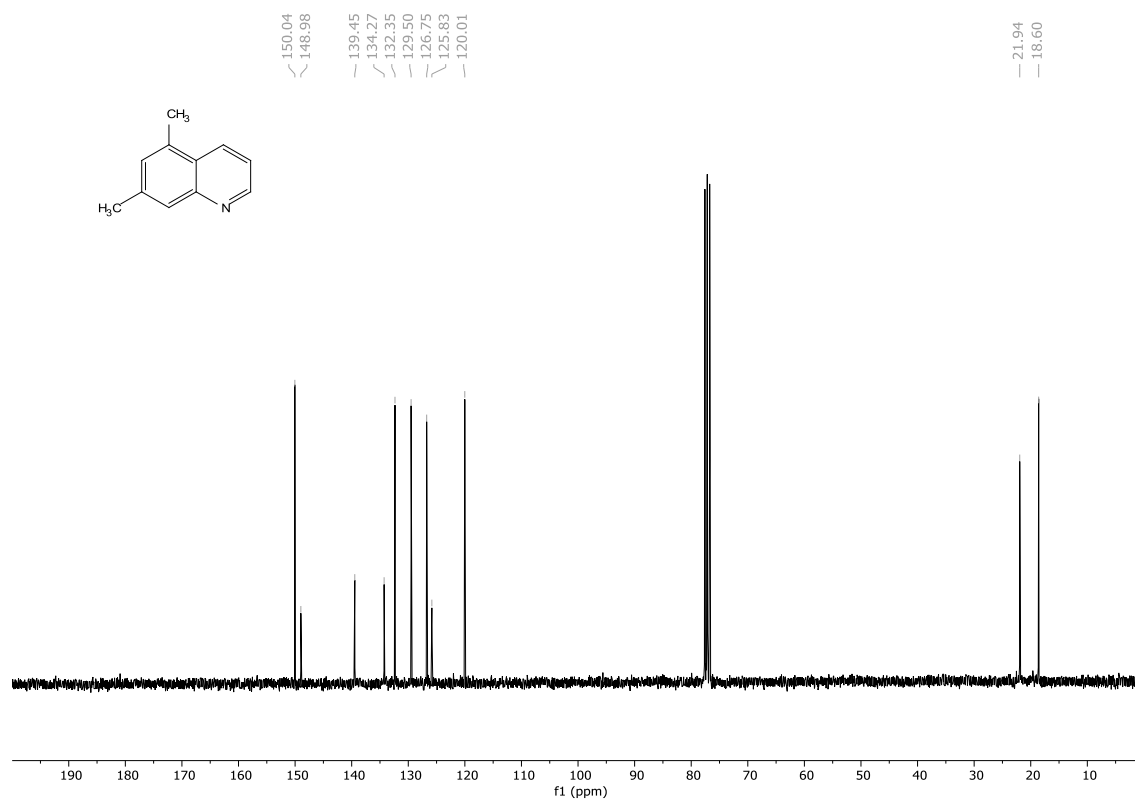

**5,7-dimethyl-1,2,3,4-tetrahydroquinoline (11b):**

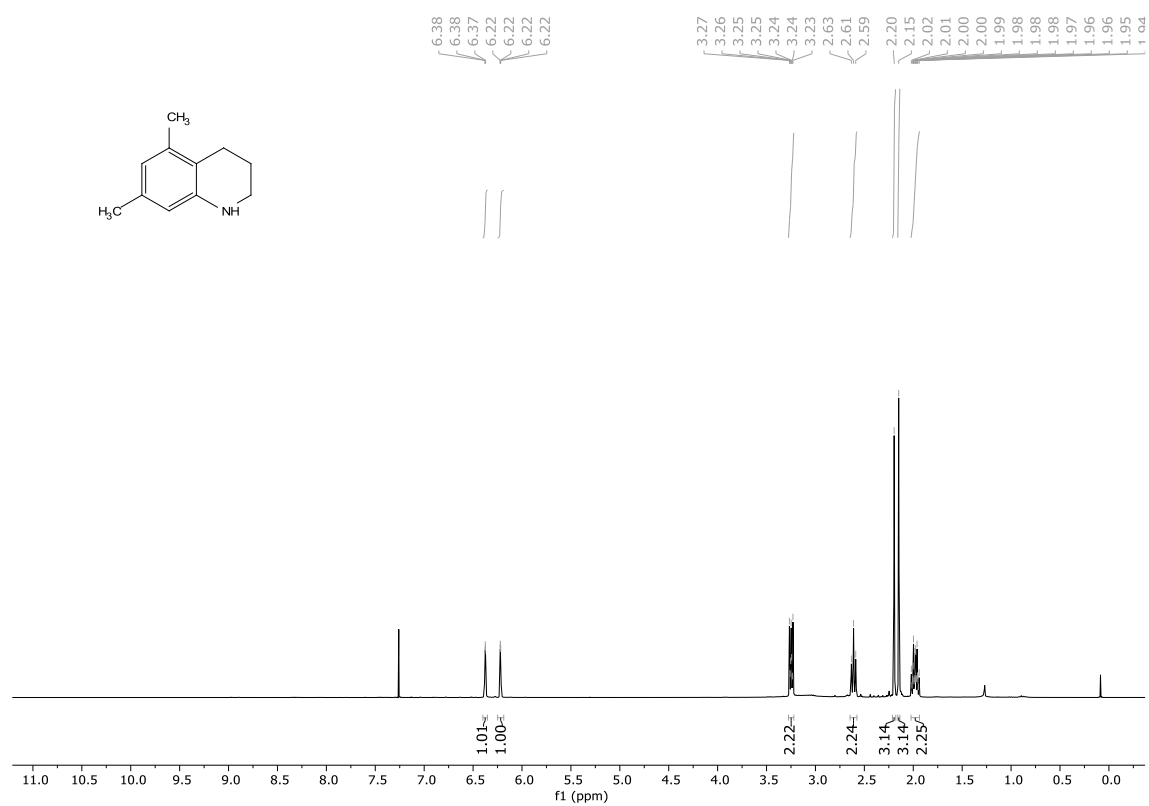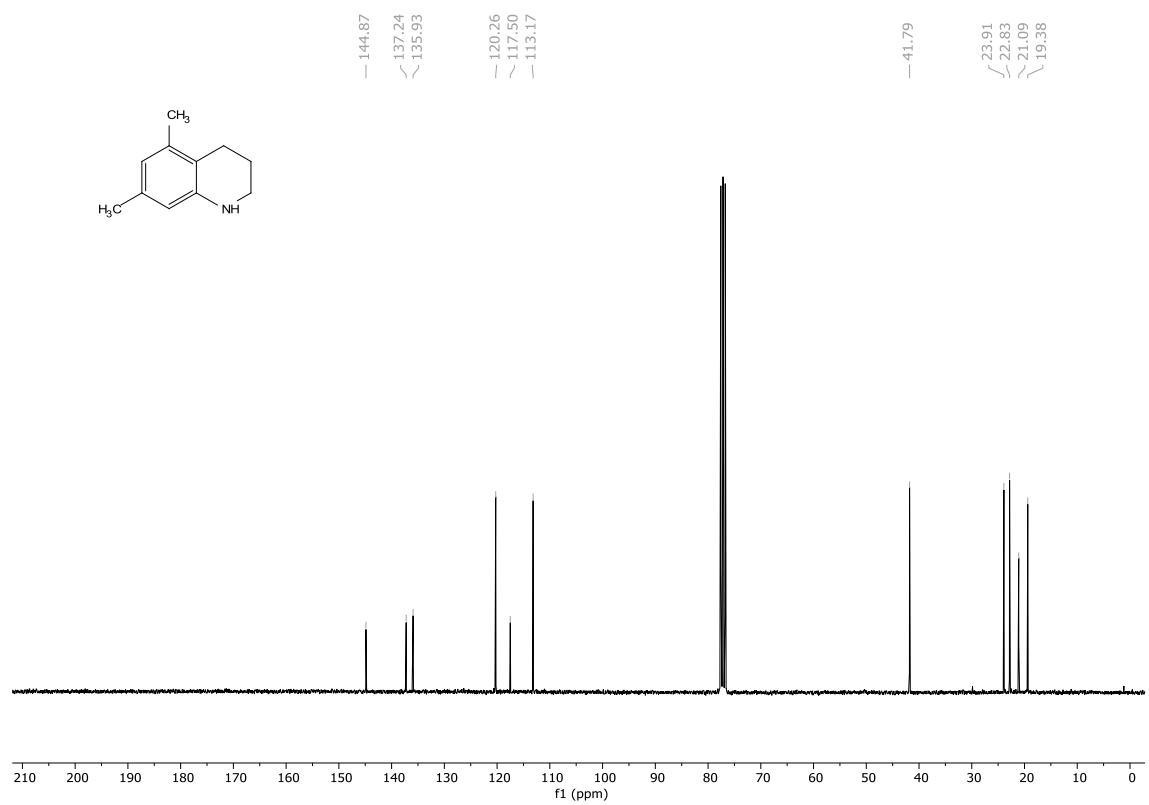

### 3,5-Dimethyljulolidine (11c):

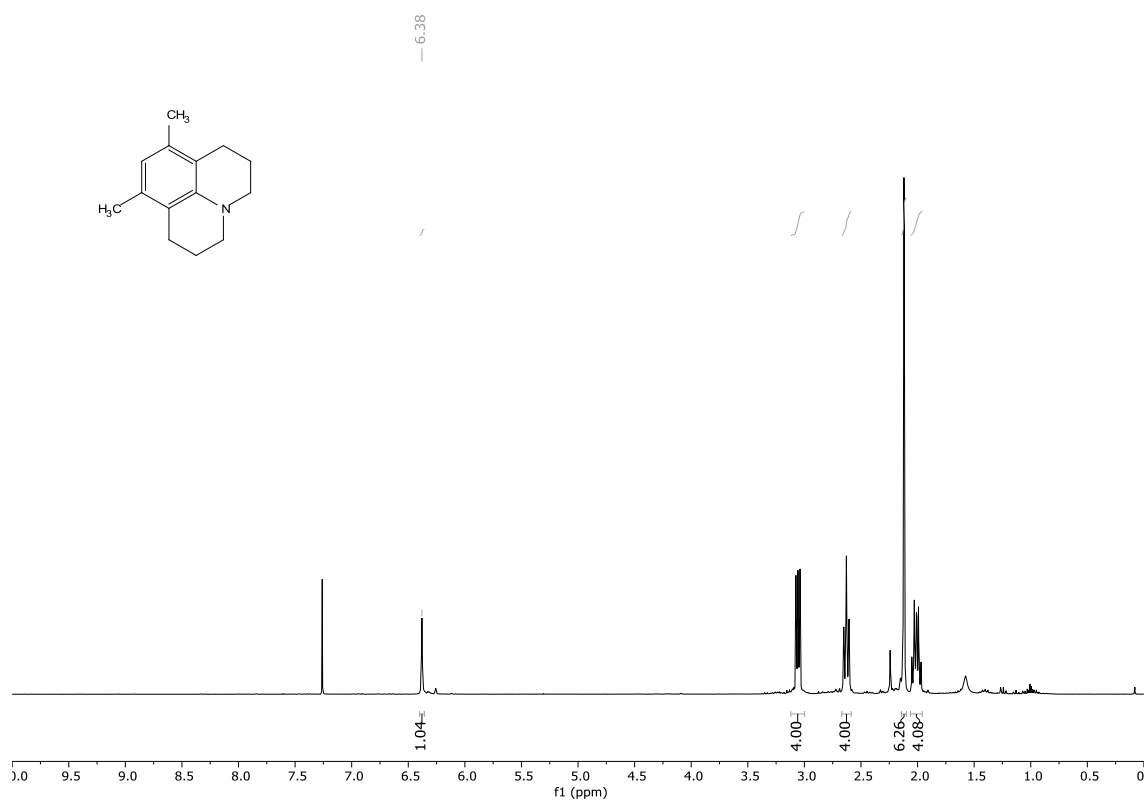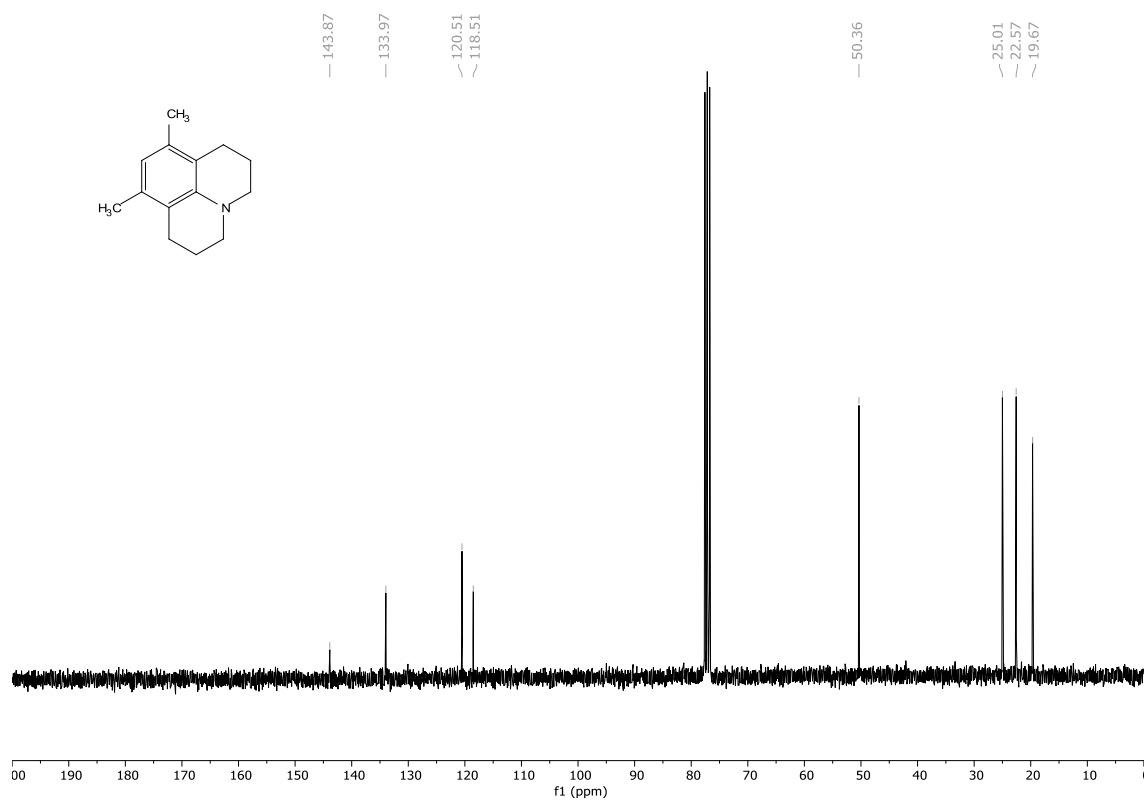

### Julolidine (12c):

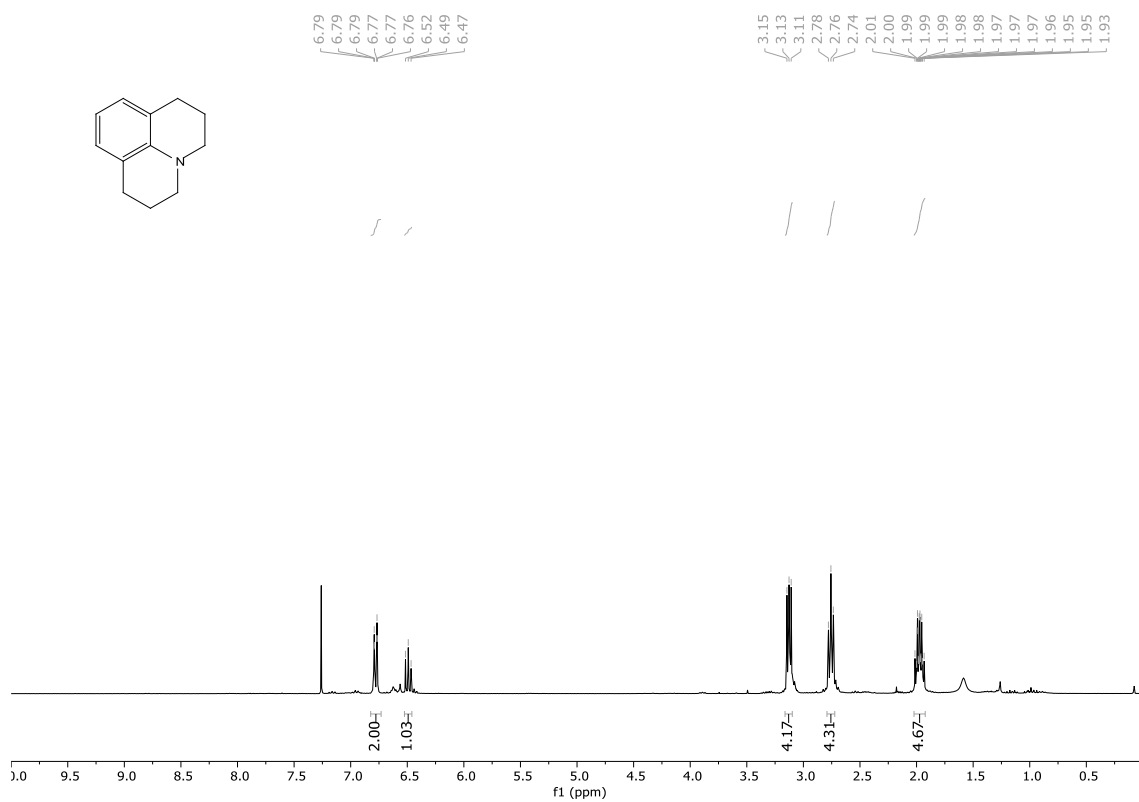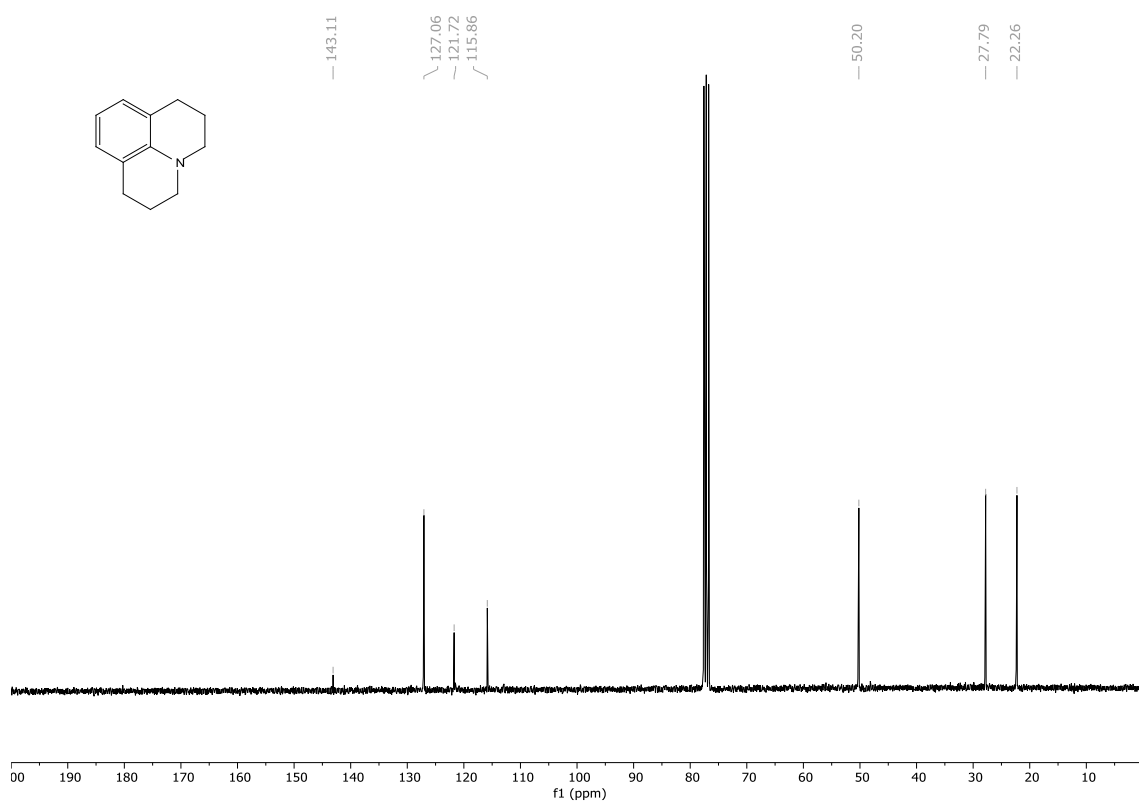

Supplement: d0ob01964j1.pdf [file d0ob01964j1.pdf]
